# Supplementary material for: The Origin of Stereoselectivity in the Hydrogenation of Oximes Catalyzed by Iridium Complexes: A DFT Mechanistic Study
Source: MDPI journal article supplement (doi:10.3390/molecules27238349), 2022-11-30
Supplement: s1 [file s1]

## Supporting Materials

# The Origin of Stereoselectivity in the Hydrogenation of Oximes Catalyzed by Iridium Complexes: A DFT Mechanistic Study

Qaim Ali <sup>1</sup>, Yongyong Chen <sup>1</sup>, Ruixue Zhang <sup>1</sup>, Zhewei Li <sup>1</sup>, Yanhui Tang <sup>1,2</sup>, Min Pu <sup>1</sup> and Ming Lei <sup>1,\*</sup>

<sup>1</sup> State Key Laboratory of Chemical Resource Engineering, Institute of Computational Chemistry, College of Chemistry, Beijing University of Chemical Technology, Beijing 100029, China

<sup>2</sup> School of Materials Design and Engineering, Beijing Institute of Fashion Technology, Beijing 100029, China

\* Correspondence: leim@mail.buct.edu.cn; Tel.: +86-10-6444-6598

|                                                                                                       |     |
|-------------------------------------------------------------------------------------------------------|-----|
| 1. Details of DFT calculations .....                                                                  | 2   |
| 2. Asymmetric Hydrogenation of Z-oximes to Hydroxylamines Catalyzed by Ir Complex A1 .....            | 3   |
| 3. Asymmetric Hydrogenation of Z-oximes to Hydroxylamines Catalyzed by Ir Complex B1 .....            | 4   |
| 4. Several Possible Forms of E-2a.....                                                                | 5   |
| 5. Independent Gradient Model Based on Hirshfeld Partition of Molecular Density (IGMH) analysis ..... | 6   |
| 6. The Hydride Transfer Step Catalyzed by Ir Complex A1 Using Different Functional .....              | 7   |
| 7. Computational Formula for R:S Ratios .....                                                         | 8   |
| 8. Energies of All the Structures.....                                                                | 9   |
| 9. Imaginary Frequencies of Transition States.....                                                    | 12  |
| 10. Cartesian Coordinates of All the Structures .....                                                 | 13  |
| References .....                                                                                      | 150 |

## 1. Details of DFT calculations

**Details of DFT calculations:** All the calculations were performed using  $\omega$ B97X-D/BSI method employing the Gaussian 09 program [1-2]. BSI indicates that the LANL2DZ basis set was used for Ir atom and 6-31G\* basis set for all other non-metal atoms [3-5]. Additionally, single point energies were calculated with ORCA package at the  $\omega$ B97M-V/def2-TZVP level using optimized geometries at the  $\omega$ B97X-D/BSI level [6-9]. The solution model based on the density (SMD) solvation model using *tert*-amyl alcohol as the solvent ( $\epsilon = 5.78$ ) was employed in calculations [10]. The frequency analyses were performed to verify that all transition states have one and only one imaginary frequency. The intrinsic reaction coordinate (IRC) calculations were performed for key steps to confirm transition states connecting two desired minima [11]. The quasi-rigid-rotor harmonic oscillator was used to consider low-frequency contributions utilizing the Shermo code [12-13]. To correct the overestimations of entropy contributions due to using the ideal gas phase model in Gaussian program, we applied a correction of  $(n-m)*1.9$  for a process from  $m$  components to  $n$  components according to the reference [14]. Unless otherwise stated, all energies of stationary points are the Gibbs free energies calculated at 298.15 K, 1.0 atm and compared to **A1** or **B1**. The noncovalent interactions are observed by mapping the independent gradient model based on Hirshfeld partition (IGMH) surfaces using Multiwfn [15-16]. In order to verify the reliability of the DFT calculations used in this work, single point energies were calculated at the  $\omega$ B97M-V/def2-TZVP, B3LYP-D3(BJ) [17-18]/def2-TZVP, PBE0-

D3(BJ) [19]/def2-TZVP level using optimized geometries at the  $\omega$ B97X-D/BSI level to investigate the reaction mechanism of stereoselectivity of asymmetric hydrogenation of oximes to hydroxylamine.

## 2. Asymmetric Hydrogenation of Z-oximes to Hydroxylamines Catalyzed by Ir

### Complex A1

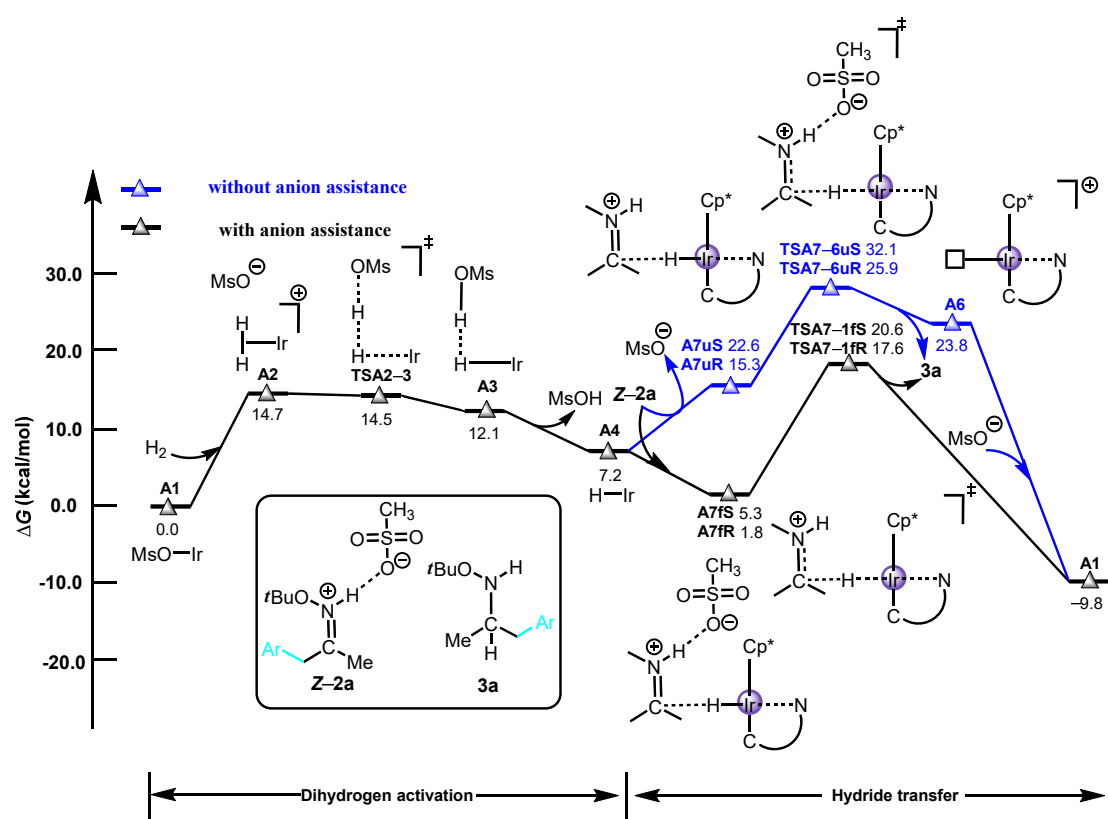

**Figure S1.** The Gibbs free energy profiles of asymmetric hydrogenation of Z-oximes to hydroxylamines catalyzed by Ir complex A1 (unit: kcal/mol). \* represents chirality and ‡ means this is a transition state.

### 3. Asymmetric Hydrogenation of Z-oximes to Hydroxylamines Catalyzed by Ir

#### Complex B1

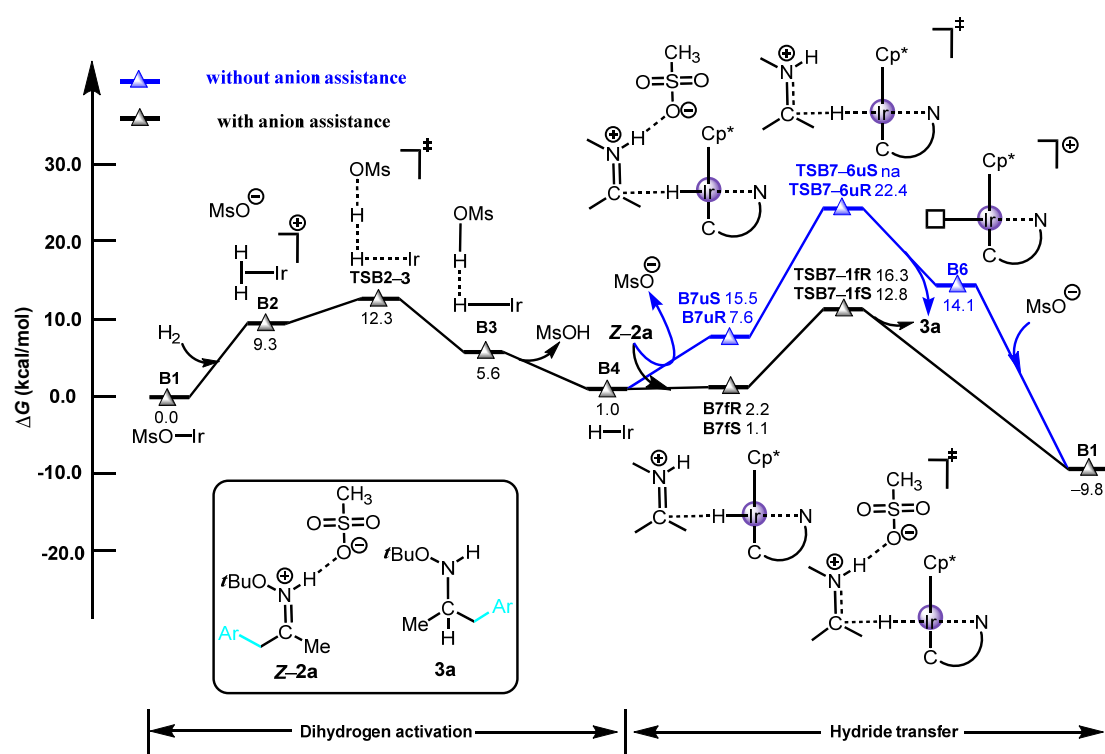

**Figure S2.** The Gibbs free energy profiles of asymmetric hydrogenation of Z-oximes to hydroxylamines catalyzed by Ir complex **B1** (unit: kcal/mol). \* represents chirality

and ‡ means this is a transition state.

#### 4. Several Possible Forms of *E*-2a.

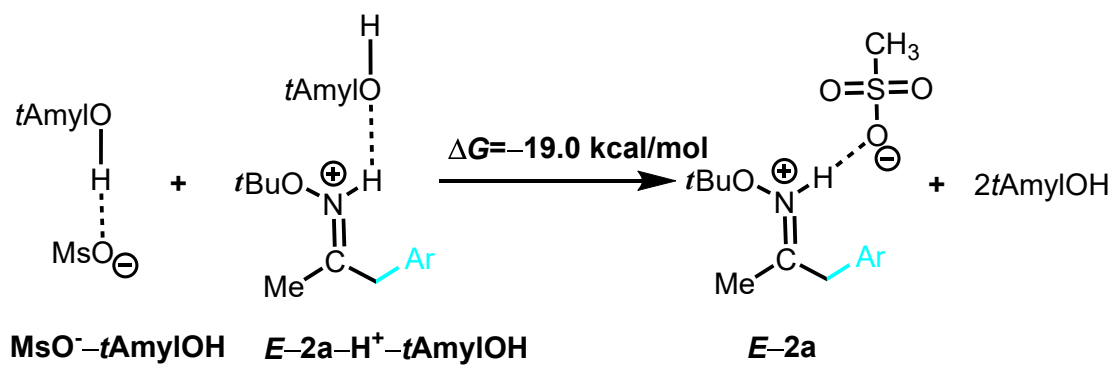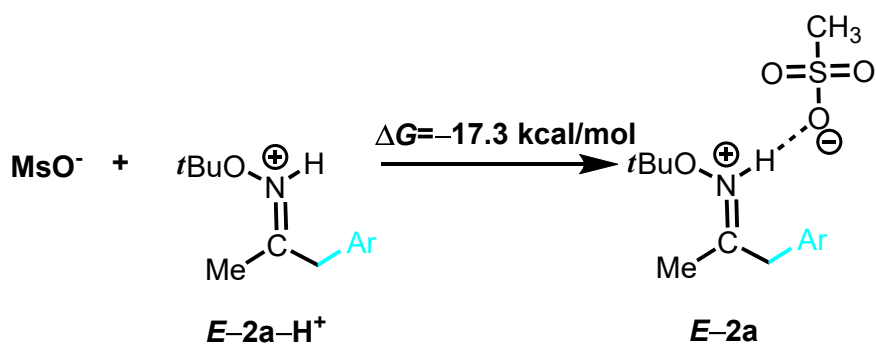

**Figure S3.** Several possible forms of *E*-2a.

## 5. Independent Gradient Model Based on Hirshfeld Partition of Molecular Density

(IGMH) analysis

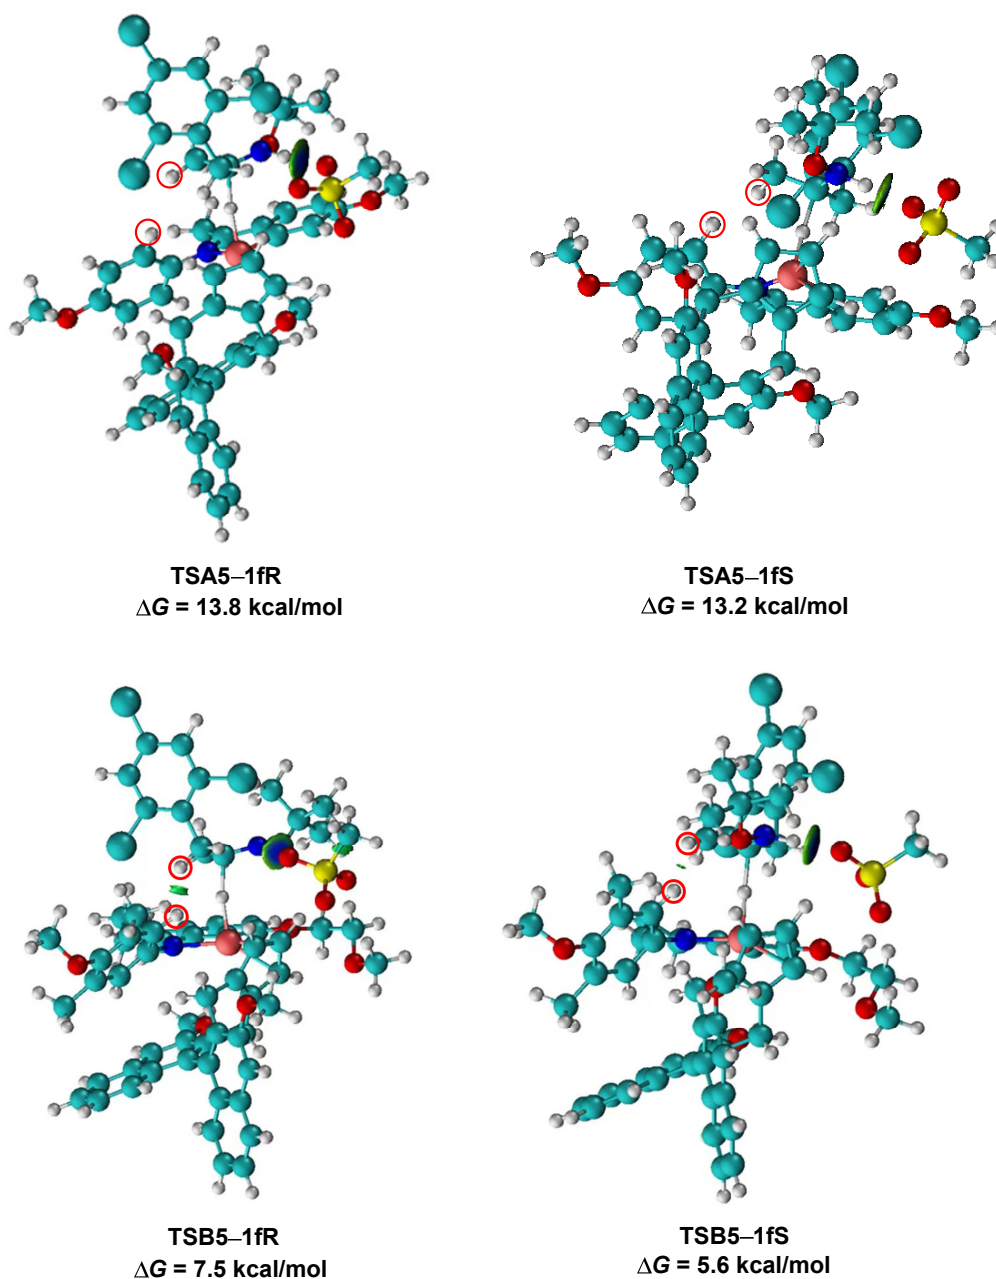

**Figure S4.** The IGMH analysis of the transition states of the  $\text{MsO}^-$ -assisted hydride transfer step of the reaction by catalyst **A1** and **B1** ( $\delta g^{\text{inter}} = 0.008$  a.u.).

## 6. The Hydride Transfer Step Catalyzed by Ir Complex A1 Using Different Functional

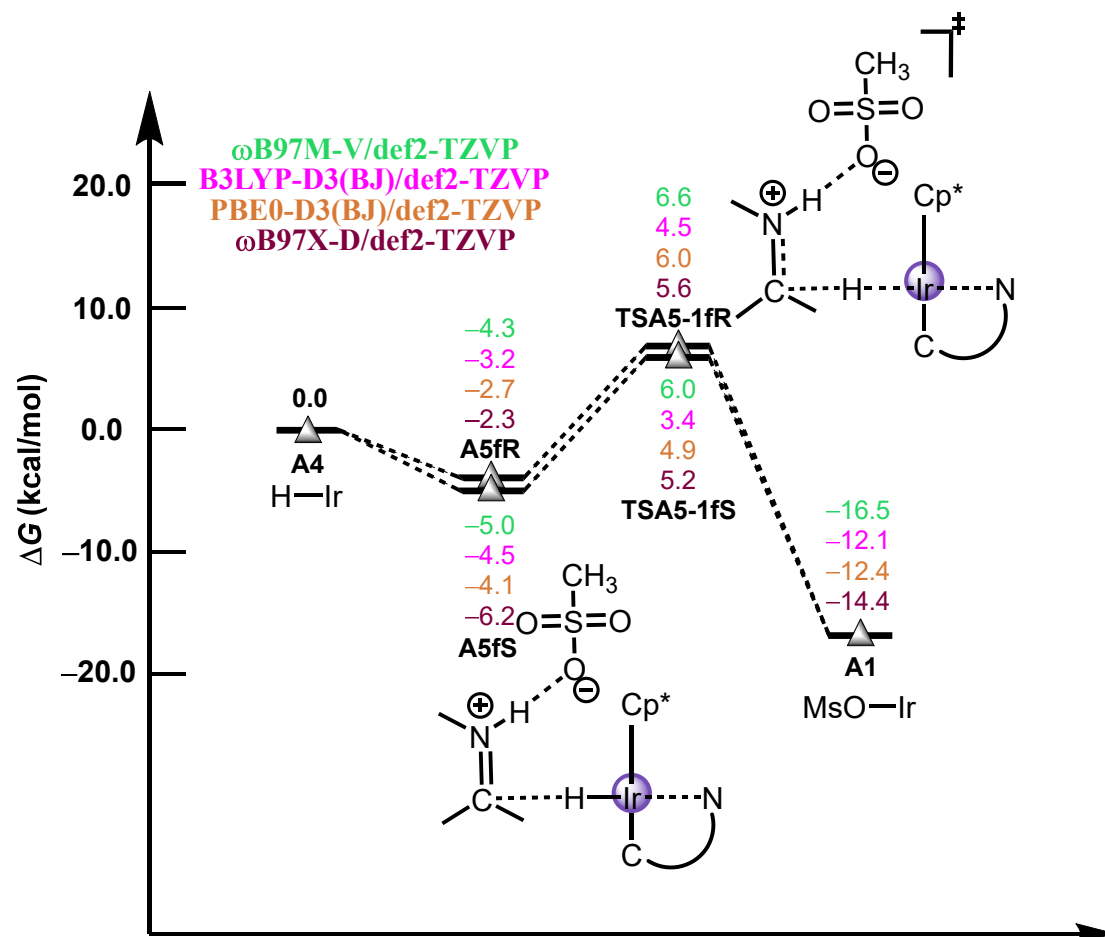

**Figure S5.** The Gibbs free energy profiles for the hydride transfer step of the asymmetric hydrogenation of oximes to hydroxylamines catalyzed by Ir complex **A1** using different functional (unit: kcal/mol). \* represents chirality and ‡ means this is a transition state.

## 7. Computational Formula for *R:S* Ratios

$$R:S = [1/(1 + e^{-\Delta\Delta G/RT})]:[e^{-\Delta\Delta G/RT}/(1 + e^{-\Delta\Delta G/RT})] \quad (1)$$

\*  $\Delta\Delta G$  is the differences in the relative Gibbs free energy between two optimized geometries

## 8. Energies of All the Structures

**Table S1.** The calculated absolute electronic energies ( $E$ , in a.u.), thermal free energies ( $G$ , in a.u.), and relative Gibbs energies ( $\Delta G$ , in kcal/mol) (Calculated at 298.15 K and 1 atm).

| Complex                | $E$           | $G$           | $\Delta G$ |
|------------------------|---------------|---------------|------------|
| <b>A1</b>              | -2862.1431381 | -2861.4216411 | 0.0        |
| <b>H<sub>2</sub></b>   | -1.1611025    | -1.1624505    | /          |
| <b>A2</b>              | -2863.2949914 | -2862.5575964 | 14.7       |
| <b>TSA2-3</b>          | -2863.2920204 | -2862.5580224 | 14.5       |
| <b>A3</b>              | -2863.2984835 | -2862.5618085 | 12.1       |
| <b>MsOH</b>            | -664.4107948  | -664.3773468  | /          |
| <b>A4</b>              | -2198.8746592 | -2198.1952972 | 7.2        |
| <b>E-2a</b>            | -2679.9476123 | -2679.6643653 | /          |
| <b>A5fR</b>            | -4878.8578214 | -4877.8634114 | 2.9        |
| <b>A5fS</b>            | -4878.8575130 | -4877.8646250 | 2.2        |
| <b>TSA5-1fR</b>        | -4878.8429560 | -4877.8461440 | 13.8       |
| <b>TSA5-1fS</b>        | -4878.8414797 | -4877.8469997 | 13.2       |
| <b>R-3a</b>            | -2016.7134580 | -2016.4642710 | /          |
| <b>S-3a</b>            | -2016.7134580 | -2016.4642950 | /          |
| <b>MsO<sup>-</sup></b> | -663.9640556  | -663.9397076  | /          |
| <b>A5uR</b>            | -4214.8417824 | -4213.8966074 | 21.8       |
| <b>A5uS</b>            | -4214.8434338 | -4213.8978378 | 21.1       |
| <b>TSA5-6uR</b>        | -4214.8346647 | -4213.8884187 | 27.0       |
| <b>TSA5-6uS</b>        | -4214.8304886 | -4213.8848666 | 29.2       |
| <b>A6</b>              | -2198.1030302 | -2197.4313812 | 24.3       |
| <b>Z-2a</b>            | -2679.9473710 | -2679.6634950 | /          |
| <b>A7fR</b>            | -4878.8563474 | -4877.8643614 | 1.8        |

|                           |               |               |      |
|---------------------------|---------------|---------------|------|
| <b>A7fS</b>               | -4878.8537967 | -4877.8588337 | 5.3  |
| <b>TSA7-1fR</b>           | -4878.8331378 | -4877.8391618 | 17.6 |
| <b>TSA7-1fS</b>           | -4878.8301471 | -4877.8343451 | 20.6 |
| <b>A7uR</b>               | -4214.8533303 | -4213.9062213 | 15.3 |
| <b>A7uS</b>               | -4214.8428416 | -4213.8945416 | 22.6 |
| <b>TSA7-6uR</b>           | -4214.8384828 | -4213.8892648 | 25.9 |
| <b>TSA7-6uS</b>           | -4214.8290717 | -4213.8793067 | 32.1 |
| <b>B1</b>                 | -3172.0115888 | -3171.1400098 | 0    |
| <b>B2</b>                 | -3173.1711861 | -3172.2846821 | 9.3  |
| <b>TSB2-3</b>             | -3173.1638759 | -3172.2798559 | 12.3 |
| <b>B3</b>                 | -3173.1777169 | -3172.2905779 | 5.6  |
| <b>B4</b>                 | -2508.7540989 | -2507.9235579 | 1.0  |
| <b>B5fR</b>               | -5188.7310825 | -5187.5850415 | 0.9  |
| <b>B5fS</b>               | -5188.7358299 | -5187.5925869 | -3.9 |
| <b>TSB5-1fR</b>           | -5188.7212877 | -5187.5745617 | 7.5  |
| <b>TSB5-1fS</b>           | -5188.7222309 | -5187.5775129 | 5.6  |
| <b>B5uR</b>               | -4524.7216575 | -4523.6257715 | 15.1 |
| <b>B5uS</b>               | -4524.7287542 | -4523.6302152 | 12.3 |
| <b>TSB5-6uR</b>           | -4524.7166776 | -4523.6200496 | 18.7 |
| <b>TSB5-6uS</b>           | -4524.7103344 | -4523.6134174 | 22.8 |
| <b>B6</b>                 | -2507.9858380 | -2507.1651160 | 14.7 |
| <b>B7fR</b>               | -5188.7278272 | -5187.5820932 | 2.2  |
| <b>B7fS</b>               | -5188.7303594 | -5187.5837864 | 1.1  |
| <b>TSB7-1fR</b>           | -5188.7044267 | -5187.5595377 | 16.3 |
| <b>TSB7-1fS</b>           | -5188.7102484 | -5187.5651084 | 12.8 |
| <b>B7uR</b>               | -4524.7334575 | -4523.6368625 | 7.6  |
| <b>B7uS</b>               | -4524.7218843 | -4523.6242333 | 15.5 |
| <b>TSB7-6uR</b>           | -4524.7110613 | -4523.6131103 | 22.5 |
| <b>E-2a-H<sup>+</sup></b> | -2015.9388469 | -2015.7000549 | /    |

---

|                                |               |               |   |
|--------------------------------|---------------|---------------|---|
| <b>t-AmylOH</b>                | -272.9535732  | -272.8179352  | / |
| <b>E-2a-H<sup>+</sup>-</b>     | -2288.9145460 | -2288.5179930 | / |
| <b>tAmylOH</b>                 |               |               |   |
| <b>MsO<sup>-</sup>-tAmylOH</b> | -936.9299102  | -936.7489352  | / |

---

## 9. Imaginary Frequencies of Transition States

**Table S2.** Calculated imaginary frequencies of transition states at  $\omega$ B97X-D/BSI level.

|                 |                 |
|-----------------|-----------------|
| <b>TSA2-3</b>   | 830.40 <i>i</i> |
| <b>TSA5-1fR</b> | 501.56 <i>i</i> |
| <b>TSA5-1fS</b> | 557.77 <i>i</i> |
| <b>TSA5-6uR</b> | 405.72 <i>i</i> |
| <b>TSA5-6uS</b> | 363.83 <i>i</i> |
| <b>TSA7-1fR</b> | 652.13 <i>i</i> |
| <b>TSA7-1fS</b> | 640.21 <i>i</i> |
| <b>TSA7-8uR</b> | 554.03 <i>i</i> |
| <b>TSA7-8uS</b> | 479.95 <i>i</i> |
| <b>TSB2-3</b>   | 995.09 <i>i</i> |
| <b>TSB5-1fR</b> | 562.14 <i>i</i> |
| <b>TSB5-1fS</b> | 524.78 <i>i</i> |
| <b>TSB5-6uR</b> | 339.83 <i>i</i> |
| <b>TSB5-6uS</b> | 364.59 <i>i</i> |
| <b>TSB7-1fR</b> | 709.91 <i>i</i> |
| <b>TSB7-1fS</b> | 631.68 <i>i</i> |
| <b>TSB7-8uR</b> | 771.36 <i>i</i> |

## 10. Cartesian Coordinates of All the Structures

**Table S3.** Atomic cartesian coordinates of intermediates and transition states (presented in Å).

A1

|    | Coordinates (Angstroms) |           |           |
|----|-------------------------|-----------|-----------|
|    | X                       | Y         | Z         |
| Ir | 1.579866                | -0.664223 | -0.614455 |
| C  | 2.885810                | 0.842289  | -0.325679 |
| N  | 1.332230                | -0.260700 | 1.417340  |
| C  | 3.691947                | 1.451099  | -1.279749 |
| C  | 4.617000                | 2.441354  | -0.919030 |
| C  | 4.765651                | 2.833074  | 0.417731  |
| C  | 3.966720                | 2.230647  | 1.381210  |
| C  | 3.033497                | 1.256608  | 1.023191  |
| C  | 2.199782                | 0.877822  | 3.431308  |
| C  | 2.148471                | 0.592741  | 1.964025  |
| C  | 0.335122                | -0.965475 | 2.149122  |
| C  | 0.291869                | -2.356312 | 2.101040  |
| C  | -0.743903               | -3.053560 | 2.716294  |
| C  | -1.755543               | -2.352798 | 3.379297  |
| C  | -1.705321               | -0.956487 | 3.441598  |
| C  | -0.666599               | -0.272100 | 2.830408  |
| O  | -2.822630               | -2.935538 | 3.988549  |
| C  | -2.951915               | -4.345533 | 3.909646  |
| H  | 5.483555                | 3.590204  | 0.710347  |
| H  | 1.687217                | 0.112444  | 4.016001  |
| H  | 3.240878                | 0.931375  | 3.762555  |
| H  | 1.067461                | -2.900583 | 1.571245  |
| H  | -0.643266               | 0.811194  | 2.854264  |
| H  | -3.877898               | -4.589605 | 4.433241  |
| H  | -3.025831               | -4.682982 | 2.868645  |
| H  | -2.114409               | -4.853030 | 4.403291  |
| C  | 1.031559                | -0.214715 | -2.657975 |
| C  | 1.310593                | -1.601468 | -2.594002 |
| C  | 0.279281                | -2.228261 | -1.786530 |
| C  | -0.578559               | -1.233793 | -1.307622 |

|   |           |           |           |
|---|-----------|-----------|-----------|
| C | -0.085593 | 0.062979  | -1.782726 |
| C | -0.808625 | 1.385786  | -1.751091 |
| C | -1.791118 | -1.442263 | -0.445796 |
| C | -1.395818 | 1.770929  | -0.412736 |
| C | -3.016600 | -0.877383 | -1.124273 |
| C | -3.726001 | -1.689967 | -2.061043 |
| C | -4.836890 | -1.214261 | -2.709065 |
| C | -5.278176 | 0.116670  | -2.478841 |
| C | -4.560339 | 0.956723  | -1.584746 |
| C | -3.416597 | 0.420231  | -0.904704 |
| C | -0.670931 | 2.677745  | 0.424715  |
| C | -1.178672 | 3.086551  | 1.632209  |
| C | -2.416593 | 2.568521  | 2.097233  |
| C | -3.148464 | 1.658953  | 1.288947  |
| C | -2.622106 | 1.301328  | 0.004668  |
| C | -2.921368 | 2.913312  | 3.378237  |
| C | -4.097254 | 2.374152  | 3.839026  |
| C | -4.824198 | 1.464869  | 3.037192  |
| C | -4.360170 | 1.116879  | 1.791866  |
| H | 1.575229  | 0.524796  | -3.231342 |
| H | 2.115587  | -2.113925 | -3.103276 |
| H | 0.212427  | -3.283403 | -1.553061 |
| H | -0.106943 | 2.156476  | -2.076625 |
| H | -1.608194 | 1.345687  | -2.500428 |
| H | -1.915172 | -2.509074 | -0.249794 |
| H | -1.652571 | -0.945411 | 0.516145  |
| H | -0.643760 | 3.789350  | 2.261832  |
| H | -2.353183 | 3.605638  | 3.994931  |
| H | -4.470647 | 2.642019  | 4.823689  |
| H | -5.748885 | 1.035268  | 3.411989  |
| H | -4.917968 | 0.409302  | 1.185970  |
| O | -3.197838 | -2.928684 | -2.239552 |
| C | -3.793794 | -3.775880 | -3.207185 |
| H | -3.754530 | -3.322985 | -4.204977 |
| H | -3.205513 | -4.694959 | -3.203334 |
| H | -4.833376 | -4.010320 | -2.948800 |
| O | 0.508584  | 3.107045  | -0.086394 |
| C | 1.209242  | 4.125861  | 0.603759  |
| H | 1.511970  | 3.801690  | 1.605542  |
| H | 2.100971  | 4.329087  | 0.009325  |
| H | 0.602536  | 5.036718  | 0.679417  |
| S | 4.474367  | -2.271305 | -0.302135 |
| C | 5.547095  | -1.209925 | 0.639355  |
| H | 5.341520  | -0.169924 | 0.380894  |

|   |           |           |           |
|---|-----------|-----------|-----------|
| H | 5.367340  | -1.379740 | 1.703307  |
| H | 6.581895  | -1.457866 | 0.389151  |
| O | 4.849502  | -3.657395 | 0.017583  |
| O | 4.609553  | -1.891676 | -1.716941 |
| O | 3.077441  | -2.002626 | 0.244730  |
| H | -0.751862 | -4.136182 | 2.660112  |
| H | 1.733009  | 1.846673  | 3.644340  |
| H | 4.081263  | 2.536361  | 2.417656  |
| H | 3.648115  | 1.164888  | -2.326441 |
| O | 5.336883  | 2.960031  | -1.943793 |
| C | 6.302276  | 3.960850  | -1.663010 |
| H | 6.754048  | 4.214131  | -2.623448 |
| H | 5.835952  | 4.855686  | -1.234153 |
| H | 7.078892  | 3.587267  | -0.985233 |
| H | -2.498161 | -0.418490 | 3.952853  |
| H | -5.388925 | -1.826934 | -3.413674 |
| C | -6.420573 | 0.634609  | -3.144990 |
| C | -6.825034 | 1.931037  | -2.944734 |
| C | -4.993457 | 2.298189  | -1.411754 |
| C | -6.098796 | 2.773960  | -2.073388 |
| H | -7.701458 | 2.314778  | -3.459797 |
| H | -6.970680 | -0.015566 | -3.820942 |
| H | -6.416066 | 3.802792  | -1.928366 |
| H | -4.439123 | 2.955335  | -0.749178 |

## A2

| Coordinates (Angstroms) |           |           |           |
|-------------------------|-----------|-----------|-----------|
|                         | X         | Y         | Z         |
| Ir                      | -1.884346 | 0.254627  | -0.632852 |
| C                       | -3.100893 | -1.343053 | -0.292651 |
| N                       | -1.591800 | -0.100936 | 1.410914  |
| C                       | -3.867534 | -2.022104 | -1.228444 |
| C                       | -4.672465 | -3.105902 | -0.848006 |
| C                       | -4.739672 | -3.514215 | 0.489963  |
| C                       | -3.985617 | -2.831449 | 1.434805  |
| C                       | -3.168080 | -1.763757 | 1.057827  |
| C                       | -2.288859 | -1.333147 | 3.436153  |
| C                       | -2.312439 | -1.030160 | 1.972035  |
| C                       | -0.610151 | 0.657509  | 2.114386  |
| C                       | -0.642740 | 2.046998  | 2.062891  |
| C                       | 0.378072  | 2.799293  | 2.635474  |

|   |           |           |           |
|---|-----------|-----------|-----------|
| C | 1.445716  | 2.154544  | 3.265459  |
| C | 1.472077  | 0.757267  | 3.331894  |
| C | 0.451258  | 0.016716  | 2.757509  |
| O | 2.501187  | 2.793599  | 3.835733  |
| C | 2.562776  | 4.206737  | 3.728282  |
| H | -5.364268 | -4.344280 | 0.798237  |
| H | -1.817039 | -0.537221 | 4.013729  |
| H | -1.458519 | 2.555814  | 1.559527  |
| H | 0.493801  | -1.066371 | 2.775977  |
| H | 3.490825  | 4.503273  | 4.220017  |
| H | 2.589496  | 4.525525  | 2.679198  |
| H | 1.716957  | 4.684761  | 4.236835  |
| C | -1.297133 | -0.320364 | -2.661290 |
| C | -1.622766 | 1.056098  | -2.692745 |
| C | -0.634368 | 1.762470  | -1.906506 |
| C | 0.242682  | 0.829250  | -1.343160 |
| C | -0.184441 | -0.506544 | -1.759284 |
| C | 0.614768  | -1.781555 | -1.684418 |
| C | 1.426147  | 1.159808  | -0.483536 |
| C | 1.300008  | -2.057545 | -0.366596 |
| C | 2.684876  | 0.713493  | -1.183782 |
| C | 3.311388  | 1.594340  | -2.107146 |
| C | 4.424582  | 1.220044  | -2.806128 |
| C | 4.966965  | -0.079235 | -2.636360 |
| C | 4.344647  | -0.986444 | -1.731958 |
| C | 3.187153  | -0.559013 | -1.003827 |
| C | 0.683484  | -2.965512 | 0.551657  |
| C | 1.288428  | -3.292997 | 1.739096  |
| C | 2.515179  | -2.678405 | 2.106075  |
| C | 3.133268  | -1.755472 | 1.220952  |
| C | 2.513594  | -1.489474 | -0.044637 |
| C | 3.116473  | -2.934169 | 3.366703  |
| C | 4.273715  | -2.294122 | 3.736480  |
| C | 4.883365  | -1.366894 | 2.861023  |
| C | 4.326507  | -1.106396 | 1.633076  |
| H | -1.810198 | -1.114980 | -3.186889 |
| H | -2.430700 | 1.512850  | -3.248568 |
| H | -0.614440 | 2.828608  | -1.724379 |
| H | -0.046301 | -2.613155 | -1.937116 |
| H | 1.373077  | -1.724724 | -2.475111 |
| H | 1.431034  | 2.234628  | -0.297504 |
| H | 1.344295  | 0.659307  | 0.481397  |
| H | 0.834457  | -3.994362 | 2.430916  |
| H | 2.638134  | -3.640601 | 4.040884  |

|   |           |           |           |
|---|-----------|-----------|-----------|
| H | 4.721276  | -2.493807 | 4.706117  |
| H | 5.792514  | -0.855742 | 3.164202  |
| H | 4.794324  | -0.383791 | 0.971990  |
| H | -1.743442 | -2.266166 | 3.619836  |
| H | 4.882909  | 1.914963  | -3.504690 |
| C | 6.115606  | -0.496039 | -3.360251 |
| C | 6.626496  | -1.758439 | -3.198785 |
| C | 4.893231  | -2.291181 | -1.596240 |
| C | 6.005261  | -2.665495 | -2.308544 |
| H | 7.506877  | -2.066854 | -3.755590 |
| H | 6.581868  | 0.205947  | -4.047195 |
| H | 6.412309  | -3.665795 | -2.190181 |
| H | 4.422554  | -2.999011 | -0.921090 |
| H | -3.466579 | 0.992506  | -0.218664 |
| S | -2.667329 | 4.500812  | -0.285512 |
| C | -3.366789 | 6.133018  | -0.118082 |
| H | -2.893912 | 6.799416  | -0.843790 |
| H | -4.441907 | 6.080945  | -0.307008 |
| H | -3.184820 | 6.496814  | 0.896051  |
| O | -3.358288 | 3.663860  | 0.731965  |
| H | -2.924601 | 1.583842  | 0.052096  |
| O | -1.215188 | 4.643670  | -0.016266 |
| O | -2.961761 | 4.067109  | -1.672175 |
| H | 2.312036  | 0.264745  | 3.813413  |
| H | 0.329182  | 3.879786  | 2.561231  |
| H | -4.037050 | -3.150480 | 2.471992  |
| H | -3.310891 | -1.470842 | 3.801208  |
| H | -3.877909 | -1.736283 | -2.276172 |
| O | -5.357461 | -3.695183 | -1.856909 |
| C | -6.196762 | -4.800330 | -1.557537 |
| H | -6.997238 | -4.515741 | -0.865110 |
| H | -6.634693 | -5.105817 | -2.509157 |
| H | -5.622726 | -5.635091 | -1.139128 |
| O | 2.744720  | 2.833266  | -2.311391 |
| C | 3.332325  | 3.873981  | -1.536048 |
| H | 4.385557  | 4.019897  | -1.806374 |
| H | 2.768653  | 4.782880  | -1.756417 |
| H | 3.265734  | 3.657391  | -0.461817 |
| O | -0.505347 | -3.469938 | 0.138165  |
| C | -1.084852 | -4.522391 | 0.888739  |
| H | -0.394479 | -5.370884 | 0.968022  |
| H | -1.374839 | -4.189417 | 1.891853  |
| H | -1.976585 | -4.824852 | 0.338545  |

# A3

| ----- |                         |           |           |
|-------|-------------------------|-----------|-----------|
|       | Coordinates (Angstroms) |           |           |
|       | X                       | Y         | Z         |
| ----- |                         |           |           |
| Ir    | -1.374252               | -0.373347 | -1.226696 |
| C     | -2.765591               | -1.227199 | -0.052754 |
| N     | -1.432435               | 0.920251  | 0.407047  |
| C     | -3.483414               | -2.398011 | -0.302770 |
| C     | -4.427968               | -2.881461 | 0.606618  |
| C     | -4.693207               | -2.198876 | 1.805090  |
| C     | -3.997331               | -1.029879 | 2.067906  |
| C     | -3.046918               | -0.542880 | 1.162520  |
| C     | -2.484074               | 1.552251  | 2.555478  |
| C     | -2.277902               | 0.663909  | 1.368682  |
| C     | -0.539422               | 2.027135  | 0.444201  |
| C     | -0.549942               | 2.961553  | -0.592878 |
| C     | 0.386180                | 3.988114  | -0.607755 |
| C     | 1.342763                | 4.072711  | 0.403185  |
| C     | 1.352635                | 3.149187  | 1.444125  |
| C     | 0.408790                | 2.127693  | 1.461228  |
| O     | 2.302135                | 5.061376  | 0.349217  |
| C     | 1.952857                | 6.236403  | 1.071745  |
| H     | -5.423500               | -2.563600 | 2.517918  |
| H     | -2.077515               | 2.551962  | 2.393330  |
| H     | -3.552087               | 1.643633  | 2.773047  |
| H     | -1.282868               | 2.876047  | -1.389030 |
| H     | 0.424150                | 1.381740  | 2.247282  |
| H     | 2.781610                | 6.937679  | 0.951987  |
| H     | 1.035253                | 6.686967  | 0.671579  |
| H     | 1.809801                | 6.019607  | 2.138229  |
| C     | -0.479635               | -2.163408 | -2.149898 |
| C     | -0.813696               | -1.225317 | -3.173505 |
| C     | 0.064355                | -0.088428 | -3.019698 |
| C     | 0.880803                | -0.314095 | -1.889265 |
| C     | 0.564604                | -1.613947 | -1.338131 |
| C     | 1.303099                | -2.374103 | -0.267595 |
| C     | 1.954452                | 0.621171  | -1.399512 |
| C     | 1.681094                | -1.554634 | 0.945250  |
| C     | 3.289432                | -0.084008 | -1.364138 |
| C     | 4.093743                | -0.114006 | -2.536268 |
| C     | 5.289244                | -0.777314 | -2.568477 |
| C     | 5.746005                | -1.478144 | -1.423314 |

|   |           |           |           |
|---|-----------|-----------|-----------|
| C | 4.948964  | -1.481040 | -0.243440 |
| C | 3.708239  | -0.765997 | -0.239328 |
| C | 0.832095  | -1.581066 | 2.096883  |
| C | 1.166858  | -0.895942 | 3.238221  |
| C | 2.336639  | -0.089709 | 3.268827  |
| C | 3.172916  | -0.016922 | 2.123092  |
| C | 2.829516  | -0.794845 | 0.969491  |
| C | 2.664275  | 0.687556  | 4.410836  |
| C | 3.767192  | 1.506188  | 4.412488  |
| C | 4.594305  | 1.586430  | 3.269043  |
| C | 4.302558  | 0.841957  | 2.151919  |
| H | -0.923303 | -3.142645 | -2.018703 |
| H | -1.526898 | -1.380572 | -3.972083 |
| H | 0.095317  | 0.790196  | -3.651042 |
| H | 0.680137  | -3.216133 | 0.042560  |
| H | 2.213447  | -2.799117 | -0.708273 |
| H | 1.990945  | 1.489845  | -2.060381 |
| H | 1.712191  | 0.984291  | -0.399728 |
| H | 0.538192  | -0.928952 | 4.121717  |
| H | 2.019502  | 0.630610  | 5.284762  |
| H | 4.004262  | 2.097804  | 5.292611  |
| H | 5.458922  | 2.244267  | 3.273297  |
| H | 4.935279  | 0.917332  | 1.272827  |
| O | 3.615888  | 0.513653  | -3.666599 |
| C | 4.150550  | 1.817381  | -3.873963 |
| H | 5.234814  | 1.777435  | -4.036387 |
| H | 3.662901  | 2.215185  | -4.766588 |
| H | 3.938386  | 2.473186  | -3.019663 |
| O | -0.286622 | -2.335122 | 1.960936  |
| C | -1.079858 | -2.574783 | 3.109599  |
| H | -1.511322 | -1.647652 | 3.502297  |
| H | -1.883443 | -3.236206 | 2.782990  |
| H | -0.492308 | -3.068666 | 3.893469  |
| H | 0.392867  | 4.722804  | -1.407536 |
| H | -2.001066 | 1.126080  | 3.442704  |
| H | -4.194953 | -0.503711 | 2.998603  |
| H | -3.335090 | -2.962868 | -1.219545 |
| O | -5.051391 | -4.031848 | 0.242405  |
| C | -5.997926 | -4.604273 | 1.130001  |
| H | -6.348595 | -5.514911 | 0.641323  |
| H | -5.537567 | -4.863615 | 2.090750  |
| H | -6.848516 | -3.932991 | 1.296306  |
| H | 2.109896  | 3.215611  | 2.220033  |
| H | 5.878144  | -0.784336 | -3.482013 |

|   |           |           |           |
|---|-----------|-----------|-----------|
| C | 6.973339  | -2.193437 | -1.435295 |
| C | 7.391757  | -2.887251 | -0.328596 |
| C | 5.406462  | -2.219350 | 0.882394  |
| C | 6.596615  | -2.901603 | 0.841370  |
| H | 8.332163  | -3.430878 | -0.348544 |
| H | 7.573627  | -2.183563 | -2.341835 |
| H | 6.930592  | -3.459692 | 1.711620  |
| H | 4.803067  | -2.244298 | 1.784625  |
| H | -2.641211 | 0.430227  | -1.832309 |
| S | -5.447304 | 1.876080  | -0.797309 |
| C | -5.958737 | 1.877157  | 0.893592  |
| H | -7.037019 | 1.699044  | 0.909870  |
| H | -5.437310 | 1.072802  | 1.414832  |
| H | -5.732322 | 2.850116  | 1.334004  |
| O | -3.909539 | 2.300602  | -0.667561 |
| H | -3.319302 | 1.577389  | -1.011139 |
| O | -6.128784 | 2.951031  | -1.501652 |
| O | -5.515216 | 0.524306  | -1.334217 |

#### A4

|    | Coordinates (Angstroms) |           |           |
|----|-------------------------|-----------|-----------|
|    | X                       | Y         | Z         |
| Ir | -1.890593               | -0.104989 | -1.480818 |
| C  | -3.521414               | -0.281168 | -0.309837 |
| N  | -1.783956               | 1.615038  | -0.308044 |
| C  | -4.424790               | -1.346524 | -0.256517 |
| C  | -5.516951               | -1.333392 | 0.615233  |
| C  | -5.756620               | -0.235569 | 1.457503  |
| C  | -4.874189               | 0.832672  | 1.419004  |
| C  | -3.767115               | 0.816394  | 0.563416  |
| C  | -2.871720               | 3.101788  | 1.346561  |
| C  | -2.763750               | 1.857629  | 0.519428  |
| C  | -0.643158               | 2.457655  | -0.414875 |
| C  | -0.288512               | 3.001549  | -1.650791 |
| C  | 0.882611                | 3.739148  | -1.772958 |
| C  | 1.707652                | 3.924485  | -0.663634 |
| C  | 1.356026                | 3.391340  | 0.572302  |
| C  | 0.180150                | 2.657648  | 0.692482  |
| O  | 2.896233                | 4.611599  | -0.798573 |
| C  | 2.756115                | 6.020935  | -0.657704 |
| H  | -6.605066               | -0.210392 | 2.131302  |

|   |           |           |           |
|---|-----------|-----------|-----------|
| H | -2.178506 | 3.876854  | 1.016153  |
| H | -3.889667 | 3.499845  | 1.285857  |
| H | -0.922288 | 2.828397  | -2.514792 |
| H | -0.088218 | 2.209456  | 1.642494  |
| H | 3.750751  | 6.452048  | -0.791715 |
| H | 2.077174  | 6.430574  | -1.416829 |
| H | 2.377060  | 6.280960  | 0.339248  |
| C | -1.366280 | -2.232234 | -1.821387 |
| C | -1.398445 | -1.543809 | -3.073215 |
| C | -0.295611 | -0.613555 | -3.080767 |
| C | 0.365921  | -0.710566 | -1.832900 |
| C | -0.274558 | -1.731953 | -1.041538 |
| C | 0.191954  | -2.315390 | 0.267415  |
| C | 1.581837  | 0.090452  | -1.445340 |
| C | 0.626565  | -1.288109 | 1.288281  |
| C | 2.724994  | -0.811653 | -1.048085 |
| C | 3.626022  | -1.282859 | -2.041723 |
| C | 4.661445  | -2.120959 | -1.730684 |
| C | 4.848038  | -2.559469 | -0.395595 |
| C | 3.946292  | -2.119666 | 0.614684  |
| C | 2.880362  | -1.232884 | 0.257746  |
| C | -0.312638 | -0.840673 | 2.271623  |
| C | 0.046868  | 0.072063  | 3.231451  |
| C | 1.352087  | 0.633799  | 3.227376  |
| C | 2.293165  | 0.223085  | 2.246069  |
| C | 1.903705  | -0.773720 | 1.291904  |
| C | 1.723329  | 1.636721  | 4.161138  |
| C | 2.970285  | 2.211195  | 4.118826  |
| C | 3.905138  | 1.807578  | 3.138737  |
| C | 3.572743  | 0.836984  | 2.225094  |
| H | -2.032882 | -3.031227 | -1.520844 |
| H | -2.066052 | -1.754913 | -3.898102 |
| H | -0.011216 | 0.043245  | -3.892638 |
| H | -0.618862 | -2.920287 | 0.679375  |
| H | 1.027749  | -2.997798 | 0.070100  |
| H | 1.867368  | 0.721271  | -2.289463 |
| H | 1.342938  | 0.754288  | -0.612634 |
| H | -0.655497 | 0.400544  | 3.990095  |
| H | 0.997134  | 1.950655  | 4.907123  |
| H | 3.240116  | 2.980881  | 4.836718  |
| H | 4.885958  | 2.273140  | 3.104025  |
| H | 4.292088  | 0.541065  | 1.467897  |
| O | 3.414531  | -0.895079 | -3.347894 |
| C | 4.261801  | 0.166466  | -3.776911 |

|   |           |           |           |
|---|-----------|-----------|-----------|
| H | 5.318405  | -0.123793 | -3.723301 |
| H | 3.997742  | 0.378175  | -4.815409 |
| H | 4.105249  | 1.067496  | -3.169915 |
| O | -1.542211 | -1.402989 | 2.175747  |
| C | -2.495448 | -1.117238 | 3.183111  |
| H | -2.733170 | -0.048701 | 3.219771  |
| H | -3.391863 | -1.676943 | 2.912512  |
| H | -2.138132 | -1.449526 | 4.165945  |
| H | 1.174340  | 4.160558  | -2.730630 |
| H | -2.665347 | 2.882812  | 2.400605  |
| H | -5.052143 | 1.679898  | 2.076575  |
| H | -4.304664 | -2.218174 | -0.895088 |
| O | -6.308091 | -2.440075 | 0.580368  |
| C | -7.433361 | -2.491425 | 1.441858  |
| H | -7.904241 | -3.459801 | 1.262968  |
| H | -7.135600 | -2.427736 | 2.495304  |
| H | -8.150617 | -1.694847 | 1.211475  |
| H | 2.012160  | 3.529571  | 1.426787  |
| H | 5.333879  | -2.462236 | -2.513468 |
| C | 5.908940  | -3.437979 | -0.046600 |
| C | 6.066598  | -3.868661 | 1.245632  |
| C | 4.131086  | -2.594685 | 1.942342  |
| C | 5.164742  | -3.443253 | 2.249421  |
| H | 6.881243  | -4.539949 | 1.502943  |
| H | 6.593970  | -3.765138 | -0.825053 |
| H | 5.291390  | -3.795195 | 3.269497  |
| H | 3.441263  | -2.280870 | 2.719562  |
| H | -2.875766 | 0.793872  | -2.387795 |

# A5fR

|    | Coordinates (Angstroms) |           |           |
|----|-------------------------|-----------|-----------|
|    | X                       | Y         | Z         |
| Ir | -0.019178               | -0.210782 | 0.131227  |
| C  | 0.708002                | -2.039699 | -0.259230 |
| N  | -0.645396               | -0.525955 | -1.828429 |
| C  | 1.404278                | -2.879989 | 0.613852  |
| C  | 1.866506                | -4.130624 | 0.200629  |
| C  | 1.624846                | -4.601527 | -1.099603 |
| C  | 0.950863                | -3.775902 | -1.985982 |
| C  | 0.495369                | -2.516150 | -1.583248 |
| C  | -0.542615               | -1.929326 | -3.867177 |

|   |           |           |           |
|---|-----------|-----------|-----------|
| C | -0.259720 | -1.618940 | -2.429079 |
| C | -1.506793 | 0.422965  | -2.444409 |
| C | -1.131837 | 1.766991  | -2.533821 |
| C | -2.022977 | 2.706379  | -3.025019 |
| C | -3.310287 | 2.321919  | -3.423014 |
| C | -3.683543 | 0.980285  | -3.353995 |
| C | -2.776558 | 0.042881  | -2.863779 |
| O | -4.122237 | 3.325269  | -3.855342 |
| C | -5.450915 | 2.990978  | -4.220832 |
| H | 1.965350  | -5.578202 | -1.423588 |
| H | -0.859213 | -1.044645 | -4.422682 |
| H | 0.355760  | -2.334910 | -4.342460 |
| H | -0.146728 | 2.073634  | -2.196389 |
| H | -3.076533 | -0.995329 | -2.775958 |
| H | -5.932076 | 3.931987  | -4.493094 |
| H | -5.471600 | 2.312254  | -5.082411 |
| H | -5.991187 | 2.534463  | -3.382523 |
| C | -0.363270 | -0.369461 | 2.311058  |
| C | 0.410011  | 0.799466  | 2.033219  |
| C | -0.447698 | 1.719406  | 1.323255  |
| C | -1.704417 | 1.094593  | 1.135788  |
| C | -1.675785 | -0.203954 | 1.764121  |
| C | -2.832058 | -1.138816 | 2.000739  |
| C | -2.880273 | 1.713264  | 0.422896  |
| C | -3.685162 | -1.384243 | 0.778224  |
| C | -4.119618 | 1.720167  | 1.285851  |
| C | -4.366700 | 2.828662  | 2.142080  |
| C | -5.472202 | 2.881935  | 2.945956  |
| C | -6.392812 | 1.804186  | 2.962991  |
| C | -6.153098 | 0.669000  | 2.138034  |
| C | -4.998023 | 0.653810  | 1.291368  |
| C | -3.405669 | -2.524874 | -0.039707 |
| C | -4.167973 | -2.805679 | -1.145406 |
| C | -5.220560 | -1.930199 | -1.524912 |
| C | -5.498544 | -0.776580 | -0.744251 |
| C | -4.715496 | -0.538058 | 0.433733  |
| C | -5.977195 | -2.164498 | -2.702911 |
| C | -6.965529 | -1.293308 | -3.091235 |
| C | -7.240548 | -0.142893 | -2.317499 |
| C | -6.521640 | 0.109048  | -1.173356 |
| H | -0.022667 | -1.231185 | 2.870738  |
| H | 1.416702  | 0.987283  | 2.383527  |
| H | -0.189032 | 2.716458  | 0.990450  |
| H | -2.435736 | -2.089046 | 2.366043  |

|   |           |           |           |
|---|-----------|-----------|-----------|
| H | -3.460515 | -0.727925 | 2.800277  |
| H | -2.615314 | 2.732480  | 0.134197  |
| H | -3.090338 | 1.163039  | -0.496696 |
| H | -3.974958 | -3.679000 | -1.759319 |
| H | -5.755720 | -3.047259 | -3.298314 |
| H | -7.535209 | -1.483936 | -3.996737 |
| H | -8.019640 | 0.546198  | -2.631312 |
| H | -6.729919 | 1.002835  | -0.593073 |
| O | -3.437978 | 3.846968  | 2.162201  |
| C | -3.827779 | 5.003827  | 1.430318  |
| H | -4.730865 | 5.457991  | 1.856453  |
| H | -3.000234 | 5.713141  | 1.499239  |
| H | -4.012713 | 4.761745  | 0.375584  |
| O | -2.365201 | -3.283338 | 0.381609  |
| C | -2.079572 | -4.481437 | -0.316361 |
| H | -1.832388 | -4.284775 | -1.364848 |
| H | -1.212367 | -4.916706 | 0.181870  |
| H | -2.924309 | -5.179641 | -0.261549 |
| H | -1.744463 | 3.753883  | -3.093508 |
| H | -1.330705 | -2.686660 | -3.950880 |
| H | 0.772109  | -4.131377 | -2.997837 |
| H | 1.633594  | -2.571497 | 1.629117  |
| O | 2.570243  | -4.829233 | 1.132851  |
| C | 3.019040  | -6.131827 | 0.803695  |
| H | 3.531125  | -6.503314 | 1.693069  |
| H | 2.179298  | -6.796450 | 0.566809  |
| H | 3.725135  | -6.116949 | -0.035506 |
| H | -4.670710 | 0.646930  | -3.653472 |
| H | -5.635272 | 3.744448  | 3.586938  |
| C | -7.540044 | 1.826272  | 3.801010  |
| C | -8.410979 | 0.767327  | 3.826012  |
| C | -7.068563 | -0.417586 | 2.198536  |
| C | -8.168430 | -0.368234 | 3.017624  |
| H | -9.285306 | 0.794000  | 4.470641  |
| H | -7.713564 | 2.700264  | 4.424032  |
| H | -8.858801 | -1.206620 | 3.049105  |
| H | -6.889913 | -1.298950 | 1.590712  |
| H | 1.313313  | 0.259733  | -0.618818 |
| C | 6.163863  | 2.180663  | 0.295146  |
| C | 7.117920  | 3.161369  | 0.057386  |
| C | 6.693056  | 4.374300  | -0.465138 |
| C | 5.355153  | 4.619674  | -0.735147 |
| C | 4.434594  | 3.609620  | -0.483032 |
| C | 4.799000  | 2.356667  | 0.028482  |

|    |          |           |           |
|----|----------|-----------|-----------|
| H  | 8.163537 | 2.981125  | 0.277589  |
| H  | 5.031256 | 5.574929  | -1.131045 |
| Cl | 2.757492 | 3.979925  | -0.819874 |
| Cl | 7.868094 | 5.623783  | -0.782543 |
| Cl | 6.726603 | 0.674035  | 0.977850  |
| C  | 3.797851 | 1.255448  | 0.289005  |
| H  | 2.787248 | 1.670776  | 0.327953  |
| H  | 3.977751 | 0.787468  | 1.261084  |
| N  | 3.960843 | -0.999033 | -0.477783 |
| C  | 3.784969 | 0.230447  | -0.810690 |
| C  | 3.581375 | 0.628860  | -2.225924 |
| H  | 2.895478 | 1.477197  | -2.272704 |
| H  | 4.543302 | 0.951200  | -2.644000 |
| H  | 3.193678 | -0.197489 | -2.821386 |
| O  | 3.854687 | -1.987238 | -1.407593 |
| C  | 5.128735 | -2.690566 | -1.675124 |
| C  | 6.128948 | -1.709162 | -2.270863 |
| H  | 5.743674 | -1.270993 | -3.197145 |
| H  | 6.374198 | -0.904949 | -1.569567 |
| H  | 7.060085 | -2.237035 | -2.501064 |
| C  | 4.700965 | -3.731994 | -2.697583 |
| H  | 5.586311 | -4.251983 | -3.076035 |
| H  | 4.027866 | -4.468201 | -2.250522 |
| H  | 4.190694 | -3.256969 | -3.542559 |
| C  | 5.640555 | -3.332284 | -0.391869 |
| H  | 6.033874 | -2.589650 | 0.309716  |
| H  | 4.841924 | -3.890088 | 0.108245  |
| H  | 6.454055 | -4.023980 | -0.633912 |
| H  | 4.031480 | -1.313039 | 0.522371  |
| S  | 3.717662 | -1.235500 | 3.390023  |
| C  | 4.887702 | -1.794216 | 4.611291  |
| H  | 4.883626 | -2.886845 | 4.627643  |
| H  | 5.881276 | -1.427495 | 4.342764  |
| H  | 4.595495 | -1.403823 | 5.589098  |
| O  | 3.777247 | 0.245277  | 3.388908  |
| O  | 2.399239 | -1.768069 | 3.794086  |
| O  | 4.212154 | -1.825553 | 2.108196  |

# A5fS

Coordinates (Angstroms)

X

Y

Z

|    |           |           |           |
|----|-----------|-----------|-----------|
| Ir | 0.257158  | 0.239781  | 0.293573  |
| C  | -0.963370 | -0.367602 | -1.172833 |
| N  | 0.571707  | -1.816802 | 0.281712  |
| C  | -1.761692 | 0.436445  | -1.990187 |
| C  | -2.572764 | -0.118150 | -2.982077 |
| C  | -2.615203 | -1.506203 | -3.192255 |
| C  | -1.833434 | -2.321708 | -2.386957 |
| C  | -1.014526 | -1.772828 | -1.393961 |
| C  | -0.062826 | -4.038220 | -0.609967 |
| C  | -0.134323 | -2.543710 | -0.541450 |
| C  | 1.558929  | -2.370845 | 1.144963  |
| C  | 1.488528  | -2.151749 | 2.517820  |
| C  | 2.500868  | -2.599457 | 3.362923  |
| C  | 3.606324  | -3.264602 | 2.826359  |
| C  | 3.677803  | -3.492593 | 1.448902  |
| C  | 2.660025  | -3.049755 | 0.618456  |
| O  | 4.658112  | -3.723342 | 3.557403  |
| C  | 4.661878  | -3.476902 | 4.953130  |
| H  | -3.248622 | -1.945955 | -3.953960 |
| H  | 0.401554  | -4.468748 | 0.279041  |
| H  | -1.066908 | -4.459890 | -0.714296 |
| H  | 0.641290  | -1.613795 | 2.932017  |
| H  | 2.731265  | -3.202178 | -0.452515 |
| H  | 5.594287  | -3.902288 | 5.328657  |
| H  | 4.642542  | -2.401494 | 5.168234  |
| H  | 3.816314  | -3.968273 | 5.450017  |
| C  | 0.830729  | 2.235044  | -0.488212 |
| C  | 0.343457  | 2.367613  | 0.847523  |
| C  | 1.306490  | 1.735668  | 1.717866  |
| C  | 2.328648  | 1.180818  | 0.912962  |
| C  | 2.058666  | 1.504889  | -0.467380 |
| C  | 2.968762  | 1.318791  | -1.652164 |
| C  | 3.531516  | 0.427143  | 1.416662  |
| C  | 3.635394  | -0.035455 | -1.735972 |
| C  | 4.804570  | 1.104650  | 0.970740  |
| C  | 5.330143  | 2.172538  | 1.760580  |
| C  | 6.471692  | 2.833077  | 1.387257  |
| C  | 7.132245  | 2.480048  | 0.179768  |
| C  | 6.605602  | 1.446244  | -0.642249 |
| C  | 5.421295  | 0.760490  | -0.211132 |
| C  | 3.033248  | -1.057709 | -2.536502 |
| C  | 3.640095  | -2.277637 | -2.700377 |
| C  | 4.842655  | -2.573260 | -2.003941 |
| C  | 5.427467  | -1.593746 | -1.157578 |

|   |           |           |           |
|---|-----------|-----------|-----------|
| C | 4.810431  | -0.303022 | -1.067828 |
| C | 5.447895  | -3.853943 | -2.097721 |
| C | 6.576601  | -4.153764 | -1.374704 |
| C | 7.149659  | -3.185093 | -0.519644 |
| C | 6.587842  | -1.935789 | -0.415062 |
| H | 0.360979  | 2.646103  | -1.372757 |
| H | -0.532991 | 2.924097  | 1.146213  |
| H | 1.257125  | 1.678973  | 2.797941  |
| H | 2.386843  | 1.493395  | -2.560107 |
| H | 3.745529  | 2.092933  | -1.620406 |
| H | 3.488518  | 0.367807  | 2.506353  |
| H | 3.518009  | -0.595551 | 1.035243  |
| H | 3.205109  | -3.047308 | -3.329105 |
| H | 4.996870  | -4.598903 | -2.749113 |
| H | 7.029812  | -5.138083 | -1.454714 |
| H | 8.035609  | -3.432173 | 0.058621  |
| H | 7.026979  | -1.200939 | 0.252734  |
| O | 4.602866  | 2.460364  | 2.871867  |
| C | 5.015418  | 3.554794  | 3.671418  |
| H | 5.021160  | 4.487406  | 3.094416  |
| H | 4.280272  | 3.632012  | 4.474074  |
| H | 6.008053  | 3.383132  | 4.104901  |
| O | 1.854574  | -0.709501 | -3.108767 |
| C | 1.229162  | -1.630850 | -3.983048 |
| H | 0.987332  | -2.569338 | -3.471952 |
| H | 0.306804  | -1.148931 | -4.310084 |
| H | 1.864389  | -1.838487 | -4.853245 |
| H | 2.417784  | -2.413701 | 4.427920  |
| H | 0.517398  | -4.353650 | -1.485468 |
| H | -1.864840 | -3.396202 | -2.548922 |
| H | -1.791817 | 1.512411  | -1.846605 |
| O | -3.322231 | 0.769668  | -3.684595 |
| C | -4.195076 | 0.284867  | -4.689626 |
| H | -4.690629 | 1.165608  | -5.101862 |
| H | -3.644577 | -0.226552 | -5.488476 |
| H | -4.950972 | -0.390472 | -4.271194 |
| H | 4.546269  | -4.001834 | 1.040939  |
| H | 6.882898  | 3.638350  | 1.986842  |
| C | 8.307583  | 3.160212  | -0.234417 |
| C | 8.928304  | 2.838494  | -1.415654 |
| C | 7.262177  | 1.146032  | -1.865169 |
| C | 8.396419  | 1.823229  | -2.242478 |
| H | 9.826896  | 3.367445  | -1.721163 |
| H | 8.706580  | 3.946799  | 0.401590  |

|    |           |           |           |
|----|-----------|-----------|-----------|
| H  | 8.886127  | 1.580673  | -3.181407 |
| H  | 6.857303  | 0.371838  | -2.509878 |
| H  | -0.977750 | -0.141230 | 1.240962  |
| C  | -5.967858 | -2.512878 | 0.153865  |
| C  | -7.153032 | -3.166532 | 0.469254  |
| C  | -8.284662 | -2.401731 | 0.709754  |
| C  | -8.252357 | -1.017196 | 0.634465  |
| C  | -7.047482 | -0.404813 | 0.314124  |
| C  | -5.866073 | -1.117410 | 0.064212  |
| H  | -7.188400 | -4.248208 | 0.525868  |
| H  | -9.141009 | -0.425022 | 0.819638  |
| Cl | -7.049344 | 1.338993  | 0.216287  |
| Cl | -9.781247 | -3.200084 | 1.114709  |
| Cl | -4.574338 | -3.526651 | -0.142217 |
| C  | -4.574407 | -0.410036 | -0.282487 |
| H  | -4.751822 | 0.395290  | -0.999868 |
| H  | -3.884127 | -1.112532 | -0.760048 |
| N  | -3.549865 | 1.359407  | 0.943900  |
| C  | -3.858575 | 0.111316  | 0.934086  |
| C  | -3.515000 | -0.805221 | 2.047913  |
| H  | -2.959488 | -1.656317 | 1.641247  |
| H  | -2.920814 | -0.315467 | 2.816323  |
| H  | -4.440861 | -1.194484 | 2.488006  |
| O  | -2.784908 | 1.879469  | 1.939355  |
| C  | -3.490442 | 2.835975  | 2.822204  |
| C  | -3.966383 | 4.033845  | 2.013772  |
| H  | -3.136334 | 4.480203  | 1.459038  |
| H  | -4.758340 | 3.766973  | 1.306749  |
| H  | -4.373774 | 4.788233  | 2.694959  |
| C  | -2.378194 | 3.215500  | 3.788601  |
| H  | -2.768426 | 3.904767  | 4.543804  |
| H  | -1.985664 | 2.328272  | 4.296634  |
| H  | -1.556859 | 3.712263  | 3.261930  |
| C  | -4.634997 | 2.123474  | 3.529680  |
| H  | -5.392706 | 1.771996  | 2.821114  |
| H  | -4.269976 | 1.272042  | 4.112800  |
| H  | -5.124903 | 2.822962  | 4.214628  |
| H  | -3.754855 | 2.001004  | 0.131533  |
| S  | -3.329033 | 4.035194  | -1.551743 |
| C  | -3.132992 | 4.008803  | -3.320302 |
| H  | -2.646068 | 3.078067  | -3.616308 |
| H  | -4.117750 | 4.078811  | -3.789204 |
| H  | -2.522113 | 4.866918  | -3.611921 |
| O  | -3.983117 | 5.315866  | -1.217584 |

|   |           |          |           |
|---|-----------|----------|-----------|
| O | -1.975227 | 3.885579 | -0.970756 |
| O | -4.193495 | 2.852001 | -1.227894 |

# A5uR

| Coordinates (Angstroms) |           |           |           |
|-------------------------|-----------|-----------|-----------|
|                         | X         | Y         | Z         |
| Ir                      | 0.477976  | 0.782094  | -0.904802 |
| C                       | 1.239728  | 2.630753  | -0.699131 |
| N                       | 0.426422  | 1.056442  | 1.159773  |
| C                       | 1.619658  | 3.511999  | -1.715190 |
| C                       | 2.182023  | 4.758468  | -1.427399 |
| C                       | 2.397366  | 5.164195  | -0.100044 |
| C                       | 2.026213  | 4.305394  | 0.923217  |
| C                       | 1.447559  | 3.062832  | 0.640523  |
| C                       | 1.110371  | 2.418094  | 3.111639  |
| C                       | 0.972972  | 2.138986  | 1.646146  |
| C                       | -0.260254 | 0.126631  | 1.988160  |
| C                       | 0.131715  | -1.212508 | 2.033276  |
| C                       | -0.601882 | -2.129932 | 2.767027  |
| C                       | -1.752724 | -1.725714 | 3.455235  |
| C                       | -2.147193 | -0.388577 | 3.420057  |
| C                       | -1.392992 | 0.526169  | 2.688552  |
| O                       | -2.415707 | -2.707252 | 4.122665  |
| C                       | -3.625412 | -2.362631 | 4.778906  |
| H                       | 2.845515  | 6.122542  | 0.134423  |
| H                       | 0.962779  | 1.520685  | 3.715030  |
| H                       | 2.107701  | 2.818210  | 3.319233  |
| H                       | 1.007695  | -1.522660 | 1.474674  |
| H                       | -1.711564 | 1.561457  | 2.635678  |
| H                       | -4.002996 | -3.288318 | 5.216512  |
| H                       | -3.455252 | -1.629343 | 5.576590  |
| H                       | -4.361902 | -1.968237 | 4.068801  |
| C                       | -0.477992 | 0.932427  | -2.902986 |
| C                       | 0.391594  | -0.200241 | -2.869762 |
| C                       | -0.188067 | -1.157600 | -1.958555 |
| C                       | -1.363890 | -0.585545 | -1.411650 |
| C                       | -1.576377 | 0.705400  | -2.015443 |
| C                       | -2.796274 | 1.581461  | -1.922508 |
| C                       | -2.262315 | -1.252915 | -0.401087 |
| C                       | -3.337979 | 1.756331  | -0.523832 |
| C                       | -3.669968 | -1.381752 | -0.927910 |

|   |           |           |           |
|---|-----------|-----------|-----------|
| C | -4.032680 | -2.543308 | -1.663653 |
| C | -5.279265 | -2.686538 | -2.207108 |
| C | -6.245354 | -1.660152 | -2.053919 |
| C | -5.907113 | -0.486731 | -1.322044 |
| C | -4.597489 | -0.371896 | -0.754585 |
| C | -2.925695 | 2.891551  | 0.243387  |
| C | -3.442401 | 3.124996  | 1.492727  |
| C | -4.346296 | 2.195347  | 2.073581  |
| C | -4.724645 | 1.031283  | 1.352273  |
| C | -4.214298 | 0.846868  | 0.024504  |
| C | -4.847999 | 2.386275  | 3.388104  |
| C | -5.684077 | 1.461357  | 3.964528  |
| C | -6.053192 | 0.298134  | 3.251642  |
| C | -5.581441 | 0.088405  | 1.978093  |
| H | -0.350455 | 1.810173  | -3.524729 |
| H | 1.266979  | -0.347546 | -3.488012 |
| H | 0.206282  | -2.136293 | -1.722373 |
| H | -2.551897 | 2.557829  | -2.346903 |
| H | -3.583020 | 1.151143  | -2.554450 |
| H | -1.851637 | -2.236959 | -0.167848 |
| H | -2.274918 | -0.676605 | 0.525946  |
| H | -3.153311 | 3.995761  | 2.071371  |
| H | -4.555879 | 3.280339  | 3.933957  |
| H | -6.062722 | 1.620600  | 4.970462  |
| H | -6.712980 | -0.431285 | 3.713014  |
| H | -5.863675 | -0.812708 | 1.442633  |
| O | -3.086013 | -3.533936 | -1.833532 |
| C | -3.222578 | -4.611317 | -0.910775 |
| H | -4.203844 | -5.091567 | -1.010559 |
| H | -2.442401 | -5.334658 | -1.154260 |
| H | -3.097280 | -4.264475 | 0.123419  |
| O | -2.014029 | 3.686025  | -0.369406 |
| C | -1.536322 | 4.826180  | 0.321768  |
| H | -1.073963 | 4.548345  | 1.275495  |
| H | -0.784226 | 5.274231  | -0.329350 |
| H | -2.344027 | 5.547219  | 0.499159  |
| H | -0.311141 | -3.174877 | 2.814067  |
| H | 0.380696  | 3.170642  | 3.432434  |
| H | 2.186312  | 4.618894  | 1.951677  |
| H | 1.498212  | 3.247898  | -2.762753 |
| O | 2.500933  | 5.517152  | -2.509721 |
| C | 3.100238  | 6.785093  | -2.299529 |
| H | 3.247226  | 7.213605  | -3.292697 |
| H | 2.448080  | 7.445752  | -1.716153 |

|    |           |           |           |
|----|-----------|-----------|-----------|
| H  | 4.071185  | 6.688717  | -1.799362 |
| H  | -3.037242 | -0.043163 | 3.934370  |
| H  | -5.525559 | -3.586635 | -2.764373 |
| C  | -7.542758 | -1.777659 | -2.620578 |
| C  | -8.465560 | -0.773825 | -2.473625 |
| C  | -6.883719 | 0.539339  | -1.197099 |
| C  | -8.128897 | 0.398576  | -1.756625 |
| H  | -9.454797 | -0.873247 | -2.911552 |
| H  | -7.790366 | -2.679784 | -3.174796 |
| H  | -8.862680 | 1.192972  | -1.652322 |
| H  | -6.635168 | 1.447262  | -0.656210 |
| H  | 2.005241  | 0.389282  | -0.625257 |
| C  | 6.383818  | -2.013606 | 0.622903  |
| C  | 7.731308  | -1.703831 | 0.503282  |
| C  | 8.087182  | -0.363590 | 0.437175  |
| C  | 7.136749  | 0.644814  | 0.494810  |
| C  | 5.797682  | 0.290813  | 0.614640  |
| C  | 5.374123  | -1.043988 | 0.677356  |
| H  | 8.479766  | -2.486987 | 0.465354  |
| H  | 7.427238  | 1.687768  | 0.446829  |
| Cl | 4.640990  | 1.597605  | 0.698720  |
| Cl | 9.770310  | 0.063940  | 0.282260  |
| Cl | 5.954804  | -3.707470 | 0.713990  |
| C  | 3.922735  | -1.430198 | 0.819036  |
| H  | 3.310847  | -0.530386 | 0.949496  |
| H  | 3.771287  | -2.042220 | 1.714829  |
| N  | 2.498234  | -3.054451 | -0.164757 |
| C  | 3.352196  | -2.118071 | -0.387881 |
| C  | 3.707760  | -1.723766 | -1.770713 |
| H  | 3.909039  | -0.651414 | -1.814438 |
| H  | 4.628585  | -2.252547 | -2.052073 |
| H  | 2.926564  | -1.989057 | -2.482464 |
| O  | 1.800685  | -3.626678 | -1.169687 |
| C  | 1.188529  | -4.933366 | -0.830976 |
| C  | 2.303683  | -5.940540 | -0.599684 |
| H  | 2.975822  | -5.978414 | -1.462749 |
| H  | 2.888116  | -5.691441 | 0.293347  |
| H  | 1.871735  | -6.934443 | -0.446804 |
| C  | 0.396423  | -5.217305 | -2.097844 |
| H  | -0.075531 | -6.200445 | -2.013343 |
| H  | -0.385808 | -4.465156 | -2.246624 |
| H  | 1.054222  | -5.223742 | -2.972932 |
| C  | 0.269120  | -4.778671 | 0.375347  |
| H  | 0.813839  | -4.668349 | 1.321308  |

|   |           |           |          |
|---|-----------|-----------|----------|
| H | -0.404519 | -3.926472 | 0.242550 |
| H | -0.335876 | -5.685218 | 0.473208 |
| H | 2.244367  | -3.338000 | 0.782591 |

# A5uS

| Coordinates (Angstroms) |           |           |           |
|-------------------------|-----------|-----------|-----------|
|                         | X         | Y         | Z         |
| Ir                      | -0.181372 | -0.611013 | -0.478677 |
| C                       | -1.184457 | -1.186417 | 1.157119  |
| N                       | -0.115655 | 1.099704  | 0.723059  |
| C                       | -1.683667 | -2.463394 | 1.446833  |
| C                       | -2.424998 | -2.718770 | 2.605924  |
| C                       | -2.701288 | -1.692025 | 3.523256  |
| C                       | -2.189299 | -0.427429 | 3.272586  |
| C                       | -1.432472 | -0.171794 | 2.124192  |
| C                       | -0.947035 | 2.285491  | 2.732823  |
| C                       | -0.803275 | 1.098969  | 1.830976  |
| C                       | 0.692067  | 2.199546  | 0.323532  |
| C                       | 0.490596  | 2.803620  | -0.918726 |
| C                       | 1.349857  | 3.807444  | -1.348207 |
| C                       | 2.421426  | 4.197260  | -0.544064 |
| C                       | 2.622191  | 3.603308  | 0.698028  |
| C                       | 1.756341  | 2.603352  | 1.128729  |
| O                       | 3.313840  | 5.147806  | -0.991706 |
| C                       | 2.863549  | 6.486422  | -0.814233 |
| H                       | -3.280722 | -1.872105 | 4.421067  |
| H                       | -0.621459 | 3.210004  | 2.253465  |
| H                       | -1.993602 | 2.399871  | 3.032253  |
| H                       | -0.322599 | 2.468231  | -1.554963 |
| H                       | 1.919812  | 2.110819  | 2.081000  |
| H                       | 3.645541  | 7.136675  | -1.212389 |
| H                       | 1.928091  | 6.667823  | -1.358567 |
| H                       | 2.708918  | 6.708856  | 0.249541  |
| C                       | 0.668611  | -2.544265 | -1.132886 |
| C                       | 0.055566  | -1.896294 | -2.248303 |
| C                       | 0.844471  | -0.727949 | -2.551969 |
| C                       | 1.895701  | -0.650375 | -1.607197 |
| C                       | 1.817095  | -1.788181 | -0.725320 |
| C                       | 2.822065  | -2.234033 | 0.305402  |
| C                       | 2.938983  | 0.434606  | -1.566120 |
| C                       | 3.319824  | -1.127804 | 1.208499  |

|   |           |           |           |
|---|-----------|-----------|-----------|
| C | 4.328967  | -0.147920 | -1.639588 |
| C | 4.919982  | -0.385863 | -2.910442 |
| C | 6.170200  | -0.927423 | -3.028619 |
| C | 6.898488  | -1.295247 | -1.868622 |
| C | 6.314591  | -1.097615 | -0.585149 |
| C | 5.012477  | -0.509177 | -0.495872 |
| C | 2.686120  | -0.925792 | 2.476156  |
| C | 3.113123  | 0.058004  | 3.332289  |
| C | 4.169179  | 0.927549  | 2.948747  |
| C | 4.798294  | 0.759636  | 1.686688  |
| C | 4.362764  | -0.308983 | 0.835773  |
| C | 4.582993  | 1.994027  | 3.789487  |
| C | 5.573084  | 2.859425  | 3.392794  |
| C | 6.193864  | 2.698192  | 2.133375  |
| C | 5.813972  | 1.673135  | 1.301304  |
| H | 0.348143  | -3.479607 | -0.690911 |
| H | -0.784536 | -2.267458 | -2.818771 |
| H | 0.675678  | -0.027778 | -3.359929 |
| H | 2.365013  | -3.021612 | 0.908748  |
| H | 3.677685  | -2.686097 | -0.211029 |
| H | 2.764878  | 1.121401  | -2.396680 |
| H | 2.839471  | 1.011662  | -0.644758 |
| H | 2.648395  | 0.206969  | 4.301105  |
| H | 4.095530  | 2.119447  | 4.753429  |
| H | 5.878355  | 3.672992  | 4.045247  |
| H | 6.969152  | 3.392031  | 1.821205  |
| H | 6.288931  | 1.563775  | 0.331288  |
| O | 4.177911  | -0.088668 | -4.033754 |
| C | 4.508975  | 1.159877  | -4.633334 |
| H | 5.537298  | 1.155253  | -5.015228 |
| H | 3.813323  | 1.301878  | -5.463215 |
| H | 4.395695  | 1.983550  | -3.916759 |
| O | 1.670677  | -1.782833 | 2.745260  |
| C | 1.047787  | -1.713471 | 4.015198  |
| H | 0.578871  | -0.737042 | 4.177704  |
| H | 0.278736  | -2.487120 | 4.010004  |
| H | 1.768447  | -1.916005 | 4.817158  |
| H | 1.208338  | 4.277532  | -2.317040 |
| H | -0.358350 | 2.144475  | 3.646632  |
| H | -2.381300 | 0.362736  | 3.993793  |
| H | -1.507994 | -3.296063 | 0.770287  |
| O | -2.852013 | -3.998488 | 2.750329  |
| C | -3.625632 | -4.336911 | 3.891058  |
| H | -3.850271 | -5.399948 | 3.790153  |

|    |           |           |           |
|----|-----------|-----------|-----------|
| H  | -3.064188 | -4.172035 | 4.817800  |
| H  | -4.563094 | -3.769070 | 3.920463  |
| H  | 3.465060  | 3.909087  | 1.310989  |
| H  | 6.599290  | -1.093618 | -4.013211 |
| C  | 8.191439  | -1.876295 | -1.962680 |
| C  | 8.874849  | -2.252386 | -0.834568 |
| C  | 7.045394  | -1.508290 | 0.563393  |
| C  | 8.292107  | -2.069010 | 0.441403  |
| H  | 9.862299  | -2.697770 | -0.917688 |
| H  | 8.629092  | -2.019143 | -2.947697 |
| H  | 8.835858  | -2.376969 | 1.330142  |
| H  | 6.604835  | -1.379565 | 1.547200  |
| H  | -1.587430 | 0.011632  | -0.939257 |
| C  | -5.022061 | 2.593385  | -0.229639 |
| C  | -5.981176 | 3.576536  | -0.441426 |
| C  | -7.315391 | 3.198629  | -0.485262 |
| C  | -7.703697 | 1.875816  | -0.322518 |
| C  | -6.712813 | 0.927397  | -0.112052 |
| C  | -5.349257 | 1.242170  | -0.057219 |
| H  | -5.690741 | 4.612608  | -0.570152 |
| H  | -8.748320 | 1.589377  | -0.356919 |
| Cl | -7.216143 | -0.735391 | 0.089895  |
| Cl | -8.534849 | 4.415979  | -0.750814 |
| Cl | -3.352402 | 3.114628  | -0.182267 |
| C  | -4.310928 | 0.180354  | 0.191568  |
| H  | -4.559772 | -0.405571 | 1.083507  |
| H  | -3.341748 | 0.647838  | 0.397651  |
| N  | -3.734558 | -1.934301 | -0.707805 |
| C  | -4.057569 | -0.719908 | -0.983483 |
| C  | -4.120064 | -0.225944 | -2.377035 |
| H  | -5.174290 | -0.152184 | -2.674468 |
| H  | -3.694727 | 0.780348  | -2.427142 |
| H  | -3.598619 | -0.889755 | -3.065050 |
| O  | -3.232000 | -2.780151 | -1.636030 |
| C  | -4.002627 | -4.040983 | -1.769899 |
| C  | -4.146930 | -4.711358 | -0.409328 |
| H  | -3.171975 | -4.847307 | 0.068188  |
| H  | -4.803462 | -4.149155 | 0.264321  |
| H  | -4.599516 | -5.697982 | -0.549076 |
| C  | -3.105880 | -4.843766 | -2.697960 |
| H  | -3.569149 | -5.814009 | -2.900329 |
| H  | -2.965143 | -4.324230 | -3.651356 |
| H  | -2.127322 | -5.015318 | -2.237537 |
| C  | -5.347063 | -3.718542 | -2.403794 |

|   |           |           |           |
|---|-----------|-----------|-----------|
| H | -5.954800 | -3.077734 | -1.755517 |
| H | -5.213393 | -3.223076 | -3.370678 |
| H | -5.903513 | -4.647509 | -2.565676 |
| H | -3.587628 | -2.237060 | 0.260676  |

## A6

| Coordinates (Angstroms) |           |           |           |
|-------------------------|-----------|-----------|-----------|
|                         | X         | Y         | Z         |
| Ir                      | -1.823187 | -0.282188 | -1.418303 |
| C                       | -3.488197 | -0.349893 | -0.248046 |
| N                       | -1.775572 | 1.605234  | -0.510097 |
| C                       | -4.366305 | -1.408017 | -0.086141 |
| C                       | -5.519300 | -1.276008 | 0.711671  |
| C                       | -5.805518 | -0.068752 | 1.354756  |
| C                       | -4.931695 | 1.002768  | 1.193370  |
| C                       | -3.788600 | 0.871582  | 0.408406  |
| C                       | -2.961478 | 3.265039  | 0.877539  |
| C                       | -2.799456 | 1.928837  | 0.232823  |
| C                       | -0.631002 | 2.441056  | -0.656085 |
| C                       | -0.224413 | 2.850166  | -1.925904 |
| C                       | 0.955365  | 3.569090  | -2.074398 |
| C                       | 1.733116  | 3.867062  | -0.954987 |
| C                       | 1.325353  | 3.468225  | 0.314475  |
| C                       | 0.141948  | 2.753014  | 0.461067  |
| O                       | 2.933674  | 4.524472  | -1.102079 |
| C                       | 2.808148  | 5.938130  | -1.214310 |
| H                       | -6.690252 | 0.050259  | 1.968885  |
| H                       | -2.271448 | 4.006265  | 0.472828  |
| H                       | -3.986493 | 3.620431  | 0.737269  |
| H                       | -0.821917 | 2.590948  | -2.795548 |
| H                       | -0.172336 | 2.408775  | 1.440598  |
| H                       | 3.819416  | 6.333579  | -1.331771 |
| H                       | 2.205858  | 6.217563  | -2.088163 |
| H                       | 2.353228  | 6.364251  | -0.310879 |
| C                       | -1.403745 | -2.391883 | -1.640604 |
| C                       | -1.420906 | -1.830141 | -2.933983 |
| C                       | -0.298660 | -0.912936 | -3.049859 |
| C                       | 0.361759  | -0.852222 | -1.821002 |
| C                       | -0.363716 | -1.724256 | -0.883821 |
| C                       | 0.078701  | -2.164451 | 0.484233  |
| C                       | 1.578920  | -0.033188 | -1.498627 |

|   |           |           |           |
|---|-----------|-----------|-----------|
| C | 0.571879  | -1.061734 | 1.391362  |
| C | 2.688246  | -0.923507 | -0.992603 |
| C | 3.568114  | -1.534054 | -1.927128 |
| C | 4.569820  | -2.372108 | -1.521450 |
| C | 4.734931  | -2.669870 | -0.145088 |
| C | 3.849383  | -2.090206 | 0.807765  |
| C | 2.822530  | -1.202303 | 0.352234  |
| C | -0.333671 | -0.503728 | 2.348769  |
| C | 0.075646  | 0.472519  | 3.221468  |
| C | 1.396772  | 0.987617  | 3.145107  |
| C | 2.305473  | 0.465328  | 2.186805  |
| C | 1.868015  | -0.599425 | 1.332321  |
| C | 1.817159  | 2.049708  | 3.988043  |
| C | 3.079945  | 2.577465  | 3.876623  |
| C | 3.981330  | 2.066297  | 2.915148  |
| C | 3.602602  | 1.034210  | 2.091571  |
| H | -2.069409 | -3.152309 | -1.254424 |
| H | -2.117741 | -2.073644 | -3.725686 |
| H | -0.047484 | -0.334541 | -3.929968 |
| H | -0.755703 | -2.686898 | 0.956406  |
| H | 0.875343  | -2.903425 | 0.334724  |
| H | 1.888560  | 0.502667  | -2.397764 |
| H | 1.336495  | 0.712510  | -0.739001 |
| H | -0.597979 | 0.886573  | 3.963941  |
| H | 1.116136  | 2.443615  | 4.720141  |
| H | 3.388663  | 3.392154  | 4.525841  |
| H | 4.974627  | 2.496540  | 2.824780  |
| H | 4.298356  | 0.654716  | 1.349638  |
| O | 3.358986  | -1.284874 | -3.265726 |
| C | 4.263842  | -0.338701 | -3.828321 |
| H | 5.298274  | -0.698511 | -3.771621 |
| H | 3.978573  | -0.218345 | -4.875609 |
| H | 4.190033  | 0.628715  | -3.315646 |
| O | -1.582478 | -1.028788 | 2.321991  |
| C | -2.529668 | -0.568182 | 3.268905  |
| H | -2.708062 | 0.507865  | 3.164857  |
| H | -3.452047 | -1.109828 | 3.053977  |
| H | -2.204224 | -0.790994 | 4.292325  |
| H | 1.290445  | 3.885071  | -3.058019 |
| H | -2.787152 | 3.179404  | 1.956615  |
| H | -5.158622 | 1.937754  | 1.697741  |
| H | -4.201382 | -2.367161 | -0.568902 |
| O | -6.293291 | -2.380801 | 0.789328  |
| C | -7.458573 | -2.340089 | 1.601539  |

|   |           |           |           |
|---|-----------|-----------|-----------|
| H | -7.912507 | -3.328559 | 1.517494  |
| H | -7.206468 | -2.143021 | 2.649773  |
| H | -8.167273 | -1.585616 | 1.241056  |
| H | 1.944170  | 3.700036  | 1.176384  |
| H | 5.228915  | -2.824740 | -2.257613 |
| C | 5.755853  | -3.551490 | 0.301027  |
| C | 5.890225  | -3.851938 | 1.632200  |
| C | 4.009178  | -2.431721 | 2.178863  |
| C | 5.003288  | -3.288469 | 2.579505  |
| H | 6.673288  | -4.528303 | 1.963157  |
| H | 6.429051  | -3.984735 | -0.434545 |
| H | 5.111494  | -3.537362 | 3.631429  |
| H | 3.330985  | -2.012932 | 2.915733  |

# A7fR

|    | Coordinates (Angstroms) |           |           |
|----|-------------------------|-----------|-----------|
|    | X                       | Y         | Z         |
| Ir | 0.134969                | 0.113874  | 0.529147  |
| C  | 0.943447                | -0.902994 | 2.061452  |
| N  | -0.189297               | -1.866589 | -0.030979 |
| C  | 1.527886                | -0.378143 | 3.218504  |
| C  | 2.069084                | -1.209726 | 4.202222  |
| C  | 2.058964                | -2.606337 | 4.057341  |
| C  | 1.492001                | -3.147065 | 2.913684  |
| C  | 0.935859                | -2.320843 | 1.930951  |
| C  | 0.189520                | -4.272445 | 0.421191  |
| C  | 0.287327                | -2.810020 | 0.734237  |
| C  | -0.948883               | -2.138692 | -1.202275 |
| C  | -0.554476               | -1.607926 | -2.434338 |
| C  | -1.356203               | -1.773138 | -3.551374 |
| C  | -2.575173               | -2.457202 | -3.453596 |
| C  | -2.965430               | -3.004769 | -2.232179 |
| C  | -2.145422               | -2.841083 | -1.117224 |
| O  | -3.309667               | -2.527931 | -4.597273 |
| C  | -4.584996               | -3.143461 | -4.526581 |
| H  | 2.482232                | -3.260036 | 4.811110  |
| H  | -0.035318               | -4.455291 | -0.631381 |
| H  | 1.128421                | -4.776286 | 0.668299  |
| H  | 0.372404                | -1.047352 | -2.506426 |
| H  | -2.462772               | -3.237971 | -0.159476 |
| H  | -5.021754               | -3.043502 | -5.521825 |

|   |           |           |           |
|---|-----------|-----------|-----------|
| H | -4.503333 | -4.207607 | -4.273630 |
| H | -5.229816 | -2.640831 | -3.795586 |
| C | -0.583308 | 1.944034  | 1.554990  |
| C | 0.216505  | 2.308007  | 0.430318  |
| C | -0.504282 | 1.919157  | -0.757231 |
| C | -1.707845 | 1.293664  | -0.349852 |
| C | -1.783137 | 1.317729  | 1.090306  |
| C | -2.958342 | 0.949182  | 1.957393  |
| C | -2.761487 | 0.744460  | -1.275077 |
| C | -3.630579 | -0.353751 | 1.586699  |
| C | -4.098164 | 1.390378  | -1.001772 |
| C | -4.407155 | 2.632194  | -1.636762 |
| C | -5.603211 | 3.263137  | -1.411117 |
| C | -6.543002 | 2.699781  | -0.506226 |
| C | -6.238792 | 1.486256  | 0.169017  |
| C | -4.988113 | 0.840402  | -0.106787 |
| C | -3.239348 | -1.552600 | 2.263563  |
| C | -3.856285 | -2.749136 | 1.996394  |
| C | -4.853345 | -2.826969 | 0.987562  |
| C | -5.227698 | -1.657975 | 0.272587  |
| C | -4.608360 | -0.411890 | 0.617576  |
| C | -5.452717 | -4.067328 | 0.643880  |
| C | -6.380965 | -4.145915 | -0.365394 |
| C | -6.750382 | -2.984322 | -1.081205 |
| C | -6.184352 | -1.771244 | -0.770157 |
| H | -0.338109 | 2.141302  | 2.590987  |
| H | 1.135314  | 2.870272  | 0.484080  |
| H | -0.192900 | 2.072260  | -1.782089 |
| H | -2.616656 | 0.898908  | 2.993931  |
| H | -3.699874 | 1.756227  | 1.907494  |
| H | -2.458425 | 0.917865  | -2.309769 |
| H | -2.851814 | -0.334471 | -1.139132 |
| H | -3.582682 | -3.657905 | 2.521992  |
| H | -5.159148 | -4.959271 | 1.192583  |
| H | -6.832940 | -5.101458 | -0.616855 |
| H | -7.484142 | -3.052095 | -1.879565 |
| H | -6.465232 | -0.885845 | -1.332433 |
| O | -3.425689 | 3.105327  | -2.448178 |
| C | -3.622098 | 4.358300  | -3.079560 |
| H | -3.770276 | 5.155374  | -2.341094 |
| H | -2.707400 | 4.553046  | -3.642267 |
| H | -4.473924 | 4.329596  | -3.769886 |
| O | -2.244884 | -1.393524 | 3.170898  |
| C | -1.840913 | -2.518341 | 3.930193  |

|    |           |           |           |
|----|-----------|-----------|-----------|
| H  | -1.474781 | -3.325107 | 3.285955  |
| H  | -1.028004 | -2.171229 | 4.569390  |
| H  | -2.665034 | -2.887673 | 4.553027  |
| H  | -1.063227 | -1.358311 | -4.511322 |
| H  | -0.600238 | -4.739079 | 1.022091  |
| H  | 1.478499  | -4.228092 | 2.799528  |
| H  | 1.599830  | 0.694263  | 3.374197  |
| O  | 2.600774  | -0.568792 | 5.279145  |
| C  | 3.173041  | -1.344732 | 6.317793  |
| H  | 3.517356  | -0.629834 | 7.067279  |
| H  | 2.434442  | -2.016498 | 6.771801  |
| H  | 4.028897  | -1.928192 | 5.957363  |
| H  | -3.903862 | -3.536329 | -2.118894 |
| H  | -5.850203 | 4.201073  | -1.896993 |
| C  | -7.783113 | 3.340793  | -0.246985 |
| C  | -8.677251 | 2.809235  | 0.648973  |
| C  | -7.177408 | 0.968678  | 1.100548  |
| C  | -8.368640 | 1.611982  | 1.333771  |
| H  | -9.622740 | 3.310583  | 0.837348  |
| H  | -8.011167 | 4.266958  | -0.769238 |
| H  | -9.076113 | 1.202217  | 2.049343  |
| H  | -6.946167 | 0.052007  | 1.634738  |
| H  | 1.573811  | -0.135105 | -0.116130 |
| C  | 6.290080  | -0.696863 | -1.911664 |
| C  | 7.317172  | -1.624040 | -1.803834 |
| C  | 6.977153  | -2.949633 | -1.573231 |
| C  | 5.654446  | -3.350453 | -1.459036 |
| C  | 4.658684  | -2.386984 | -1.573066 |
| C  | 4.934064  | -1.032440 | -1.798362 |
| H  | 8.352646  | -1.318218 | -1.898637 |
| H  | 5.400127  | -4.389394 | -1.285002 |
| Cl | 3.008214  | -2.941173 | -1.434096 |
| Cl | 8.242926  | -4.141025 | -1.426713 |
| Cl | 6.741743  | 0.967590  | -2.204290 |
| C  | 3.858006  | 0.013419  | -1.935922 |
| H  | 2.869292  | -0.454152 | -2.005756 |
| H  | 3.986725  | 0.579259  | -2.863415 |
| N  | 3.270790  | 2.129348  | -0.964554 |
| C  | 3.796763  | 0.971548  | -0.783329 |
| C  | 4.278404  | 0.626101  | 0.584429  |
| H  | 4.082727  | -0.431995 | 0.778295  |
| H  | 5.360156  | 0.789736  | 0.654482  |
| H  | 3.768130  | 1.220394  | 1.345094  |
| O  | 2.659451  | 2.407267  | -2.142963 |

|   |          |          |           |
|---|----------|----------|-----------|
| C | 2.792113 | 3.806743 | -2.609107 |
| C | 2.305978 | 3.686411 | -4.045845 |
| H | 2.310318 | 4.674750 | -4.515140 |
| H | 2.955545 | 3.023307 | -4.626618 |
| H | 1.283635 | 3.295074 | -4.078059 |
| C | 1.874747 | 4.702956 | -1.786024 |
| H | 2.188045 | 4.765029 | -0.739969 |
| H | 1.905426 | 5.716609 | -2.199546 |
| H | 0.841265 | 4.345019 | -1.831148 |
| C | 4.250447 | 4.235431 | -2.537212 |
| H | 4.353283 | 5.228020 | -2.987089 |
| H | 4.606379 | 4.303089 | -1.503700 |
| H | 4.889084 | 3.541602 | -3.093556 |
| H | 3.244954 | 2.848809 | -0.199025 |
| S | 3.301501 | 4.010339 | 2.404520  |
| C | 4.835746 | 3.768012 | 3.275558  |
| H | 5.524457 | 4.575686 | 3.016663  |
| H | 4.638449 | 3.775879 | 4.350327  |
| H | 5.261512 | 2.805156 | 2.983310  |
| O | 2.431542 | 2.870729 | 2.766586  |
| O | 3.679897 | 3.976263 | 0.952502  |
| O | 2.777236 | 5.327896 | 2.807511  |

# A7fS

| Coordinates (Angstroms) |           |           |           |
|-------------------------|-----------|-----------|-----------|
|                         | X         | Y         | Z         |
| Ir                      | -0.141913 | 0.407611  | -0.142245 |
| C                       | 0.827642  | 0.411883  | 1.616185  |
| N                       | -0.403627 | -1.551658 | 0.514769  |
| C                       | 1.460144  | 1.493903  | 2.233594  |
| C                       | 2.108831  | 1.350623  | 3.461388  |
| C                       | 2.171392  | 0.108265  | 4.111480  |
| C                       | 1.556326  | -0.979990 | 3.511976  |
| C                       | 0.882250  | -0.839042 | 2.293790  |
| C                       | 0.121764  | -3.303025 | 2.182652  |
| C                       | 0.174775  | -1.911050 | 1.628812  |
| C                       | -1.226599 | -2.434496 | -0.238355 |
| C                       | -0.965745 | -2.653197 | -1.588005 |
| C                       | -1.825929 | -3.425587 | -2.363932 |
| C                       | -2.970009 | -3.981418 | -1.785184 |
| C                       | -3.229016 | -3.775547 | -0.426647 |

|   |           |           |           |
|---|-----------|-----------|-----------|
| C | -2.363396 | -3.007768 | 0.336676  |
| O | -3.886300 | -4.729210 | -2.458769 |
| C | -3.706618 | -4.905838 | -3.853890 |
| H | 2.681822  | -0.011947 | 5.060052  |
| H | -0.115096 | -4.040563 | 1.413440  |
| H | 1.078570  | -3.572334 | 2.638496  |
| H | -0.091036 | -2.201173 | -2.045177 |
| H | -2.584546 | -2.820714 | 1.381193  |
| H | -4.562363 | -5.491656 | -4.193855 |
| H | -3.696353 | -3.943292 | -4.379848 |
| H | -2.783401 | -5.455730 | -4.073536 |
| C | -0.844829 | 2.508268  | -0.252885 |
| C | -0.220488 | 2.157276  | -1.486922 |
| C | -1.052195 | 1.167499  | -2.124402 |
| C | -2.150309 | 0.901056  | -1.267942 |
| C | -2.048197 | 1.744306  | -0.103678 |
| C | -3.061893 | 1.938272  | 0.995330  |
| C | -3.256334 | -0.077534 | -1.566128 |
| C | -3.637894 | 0.651503  | 1.543028  |
| C | -4.612235 | 0.579769  | -1.483955 |
| C | -5.162567 | 1.203262  | -2.636970 |
| C | -6.381538 | 1.822832  | -2.604098 |
| C | -7.118551 | 1.880703  | -1.393746 |
| C | -6.574356 | 1.291941  | -0.217165 |
| C | -5.305436 | 0.633027  | -0.291350 |
| C | -3.063111 | 0.073094  | 2.720493  |
| C | -3.563264 | -1.088404 | 3.254445  |
| C | -4.642638 | -1.759360 | 2.619225  |
| C | -5.218506 | -1.212145 | 1.441898  |
| C | -4.702776 | 0.025478  | 0.934164  |
| C | -5.135793 | -2.993679 | 3.118213  |
| C | -6.151880 | -3.657715 | 2.475408  |
| C | -6.721732 | -3.116838 | 1.300611  |
| C | -6.263855 | -1.923377 | 0.796814  |
| H | -0.487472 | 3.259044  | 0.440419  |
| H | 0.657197  | 2.630479  | -1.903941 |
| H | -0.892200 | 0.715645  | -3.094964 |
| H | -2.582632 | 2.495302  | 1.803548  |
| H | -3.879432 | 2.565143  | 0.618815  |
| H | -3.092370 | -0.500114 | -2.559383 |
| H | -3.221381 | -0.905730 | -0.856470 |
| H | -3.141049 | -1.524811 | 4.153421  |
| H | -4.689106 | -3.410543 | 4.017866  |
| H | -6.518517 | -4.602569 | 2.867498  |

|    |            |           |           |
|----|------------|-----------|-----------|
| H  | -7.520832  | -3.649854 | 0.792970  |
| H  | -6.699838  | -1.521398 | -0.112535 |
| O  | -4.412109  | 1.204428  | -3.793535 |
| C  | -4.789131  | 0.206902  | -4.736315 |
| H  | -5.814851  | 0.364163  | -5.092184 |
| H  | -4.094482  | 0.295963  | -5.574620 |
| H  | -4.709810  | -0.798353 | -4.301988 |
| O  | -2.030791  | 0.771761  | 3.251650  |
| C  | -1.514242  | 0.363217  | 4.505055  |
| H  | -1.079855  | -0.640343 | 4.451956  |
| H  | -0.730849  | 1.081498  | 4.750191  |
| H  | -2.293944  | 0.388910  | 5.276220  |
| H  | -1.596717  | -3.575178 | -3.412974 |
| H  | -0.640892  | -3.371067 | 2.967550  |
| H  | 1.598272   | -1.942619 | 4.015027  |
| H  | 1.488472   | 2.470723  | 1.759704  |
| O  | 2.674569   | 2.485841  | 3.956020  |
| C  | 3.517687   | 2.387022  | 5.090468  |
| H  | 3.934858   | 3.384544  | 5.240562  |
| H  | 2.956102   | 2.093642  | 5.985767  |
| H  | 4.336087   | 1.676641  | 4.920833  |
| H  | -4.124611  | -4.204274 | 0.013595  |
| H  | -6.775796  | 2.288914  | -3.503343 |
| C  | -8.379001  | 2.532546  | -1.324982 |
| C  | -9.067552  | 2.605828  | -0.140985 |
| C  | -7.308535  | 1.395593  | 0.996231  |
| C  | -8.522730  | 2.034095  | 1.032697  |
| H  | -10.030013 | 3.107929  | -0.098416 |
| H  | -8.787231  | 2.976976  | -2.229428 |
| H  | -9.068033  | 2.105892  | 1.969642  |
| H  | -6.896942  | 0.967101  | 1.904833  |
| H  | 1.267808   | -0.141802 | -0.655553 |
| C  | 6.129275   | -1.554198 | -2.089048 |
| C  | 7.313991   | -2.165422 | -1.699098 |
| C  | 7.294485   | -2.956812 | -0.560107 |
| C  | 6.130217   | -3.147381 | 0.170064  |
| C  | 4.967665   | -2.518032 | -0.258964 |
| C  | 4.924190   | -1.694848 | -1.391448 |
| H  | 8.226154   | -2.018716 | -2.265481 |
| H  | 6.123151   | -3.769907 | 1.057124  |
| Cl | 3.532334   | -2.787423 | 0.694640  |
| Cl | 8.766816   | -3.730273 | -0.033164 |
| Cl | 6.186011   | -0.546446 | -3.516617 |
| C  | 3.652425   | -1.046923 | -1.880936 |

|   |          |           |           |
|---|----------|-----------|-----------|
| H | 2.799650 | -1.387623 | -1.284286 |
| H | 3.453172 | -1.363822 | -2.909023 |
| N | 3.944146 | 1.143613  | -0.834082 |
| C | 3.592611 | 0.454335  | -1.860222 |
| C | 2.993302 | 1.161055  | -3.022776 |
| H | 3.548894 | 0.912053  | -3.932092 |
| H | 1.972499 | 0.779110  | -3.146582 |
| H | 2.961505 | 2.243358  | -2.892321 |
| O | 4.289606 | 0.521407  | 0.318558  |
| C | 5.426818 | 1.134752  | 1.044313  |
| C | 5.055198 | 2.530391  | 1.531549  |
| H | 5.801657 | 2.854361  | 2.264419  |
| H | 5.047591 | 3.263051  | 0.720514  |
| H | 4.076349 | 2.530344  | 2.015332  |
| C | 5.591369 | 0.166083  | 2.205958  |
| H | 5.886658 | -0.826002 | 1.850203  |
| H | 6.371156 | 0.535035  | 2.879446  |
| H | 4.655274 | 0.077062  | 2.767044  |
| C | 6.651920 | 1.158647  | 0.142741  |
| H | 7.486593 | 1.616026  | 0.684189  |
| H | 6.948185 | 0.147781  | -0.150756 |
| H | 6.474557 | 1.758512  | -0.757113 |
| H | 3.871305 | 2.192466  | -0.829938 |
| S | 2.745039 | 4.680881  | -1.097287 |
| C | 3.359969 | 6.328124  | -0.819683 |
| H | 3.989320 | 6.621641  | -1.663154 |
| H | 2.509705 | 7.009423  | -0.734434 |
| H | 3.941301 | 6.340156  | 0.105336  |
| O | 1.964768 | 4.306357  | 0.100176  |
| O | 3.972302 | 3.832590  | -1.257921 |
| O | 1.948068 | 4.729107  | -2.341729 |

# A7uR

| Coordinates (Angstroms) |           |           |           |
|-------------------------|-----------|-----------|-----------|
|                         | X         | Y         | Z         |
| Ir                      | 0.373966  | -0.395941 | 0.094269  |
| C                       | 1.058190  | -1.842479 | -1.110587 |
| N                       | -0.048278 | 0.357003  | -1.800254 |
| C                       | 1.544573  | -3.103507 | -0.742748 |
| C                       | 2.043778  | -4.005752 | -1.689812 |
| C                       | 2.078392  | -3.670145 | -3.052316 |

|   |           |           |           |
|---|-----------|-----------|-----------|
| C | 1.567598  | -2.439977 | -3.442460 |
| C | 1.051919  | -1.543009 | -2.501760 |
| C | 0.281552  | 0.190851  | -4.248401 |
| C | 0.407243  | -0.290956 | -2.836474 |
| C | -0.859276 | 1.519958  | -1.921816 |
| C | -0.470833 | 2.721264  | -1.323878 |
| C | -1.318486 | 3.816053  | -1.349014 |
| C | -2.576293 | 3.723191  | -1.959453 |
| C | -2.963591 | 2.530612  | -2.570377 |
| C | -2.098232 | 1.438636  | -2.546990 |
| O | -3.346112 | 4.843462  | -1.903569 |
| C | -4.651630 | 4.777856  | -2.453812 |
| H | 2.472229  | -4.352963 | -3.796092 |
| H | 0.005528  | 1.245585  | -4.297675 |
| H | 1.234222  | 0.056401  | -4.770614 |
| H | 0.492734  | 2.787322  | -0.829554 |
| H | -2.408263 | 0.500845  | -2.994652 |
| H | -5.100289 | 5.756976  | -2.277319 |
| H | -4.621831 | 4.583725  | -3.532900 |
| H | -5.253192 | 4.006553  | -1.957747 |
| C | -0.186607 | -1.569969 | 1.878120  |
| C | 0.615915  | -0.459675 | 2.283996  |
| C | -0.158561 | 0.736245  | 2.061904  |
| C | -1.395423 | 0.355063  | 1.488924  |
| C | -1.441121 | -1.081012 | 1.385598  |
| C | -2.624417 | -1.943393 | 1.028623  |
| C | -2.498434 | 1.300533  | 1.092646  |
| C | -3.401338 | -1.480303 | -0.184106 |
| C | -3.781918 | 0.949601  | 1.805354  |
| C | -4.018750 | 1.490400  | 3.106172  |
| C | -5.164989 | 1.192875  | 3.796831  |
| C | -6.122302 | 0.306113  | 3.234631  |
| C | -5.889164 | -0.274215 | 1.958009  |
| C | -4.691415 | 0.077246  | 1.251388  |
| C | -3.096604 | -2.043947 | -1.464086 |
| C | -3.805386 | -1.683538 | -2.582626 |
| C | -4.817788 | -0.690860 | -2.495734 |
| C | -5.112169 | -0.090401 | -1.242881 |
| C | -4.394889 | -0.530791 | -0.082357 |
| C | -5.515459 | -0.252428 | -3.652021 |
| C | -6.457820 | 0.743420  | -3.570876 |
| C | -6.744885 | 1.348313  | -2.325878 |
| C | -6.086455 | 0.940950  | -1.190554 |
| H | 0.082277  | -2.614779 | 1.974166  |

|   |           |           |           |
|---|-----------|-----------|-----------|
| H | 1.581836  | -0.519127 | 2.766730  |
| H | 0.139786  | 1.751509  | 2.288717  |
| H | -2.266979 | -2.962812 | 0.865723  |
| H | -3.302959 | -1.980768 | 1.889799  |
| H | -2.197208 | 2.322704  | 1.330593  |
| H | -2.659852 | 1.252324  | 0.014052  |
| H | -3.594482 | -2.121722 | -3.552108 |
| H | -5.286787 | -0.717556 | -4.608000 |
| H | -6.983211 | 1.070573  | -4.463925 |
| H | -7.489677 | 2.137153  | -2.268585 |
| H | -6.305628 | 1.418212  | -0.240397 |
| O | -3.025551 | 2.293494  | 3.568065  |
| C | -3.175028 | 2.875575  | 4.851476  |
| H | -3.257994 | 2.106476  | 5.628795  |
| H | -2.269794 | 3.461576  | 5.018511  |
| H | -4.049518 | 3.536481  | 4.888806  |
| O | -2.082319 | -2.944091 | -1.462380 |
| C | -1.753303 | -3.592520 | -2.677872 |
| H | -1.444597 | -2.871996 | -3.442953 |
| H | -0.916894 | -4.253189 | -2.444818 |
| H | -2.597761 | -4.186421 | -3.048437 |
| H | -1.028557 | 4.753268  | -0.883590 |
| H | -0.475238 | -0.388788 | -4.789572 |
| H | 1.567373  | -2.188707 | -4.500160 |
| H | 1.526168  | -3.423651 | 0.295986  |
| O | 2.486807  | -5.186169 | -1.188334 |
| C | 2.985280  | -6.165531 | -2.086738 |
| H | 3.259580  | -7.022001 | -1.468363 |
| H | 2.219303  | -6.470175 | -2.808755 |
| H | 3.873049  | -5.803935 | -2.618375 |
| H | -3.930331 | 2.422931  | -3.049625 |
| H | -5.358653 | 1.608522  | 4.779944  |
| C | -7.309932 | -0.027377 | 3.937751  |
| C | -8.220974 | -0.905006 | 3.404509  |
| C | -6.843451 | -1.188685 | 1.438687  |
| C | -7.982488 | -1.495690 | 2.142810  |
| H | -9.126181 | -1.151363 | 3.952963  |
| H | -7.483573 | 0.424827  | 4.911349  |
| H | -8.702582 | -2.197493 | 1.731285  |
| H | -6.666773 | -1.651882 | 0.472621  |
| H | 1.797768  | 0.278351  | -0.184787 |
| C | 6.748213  | 1.515389  | 0.446912  |
| C | 7.533726  | 2.553940  | -0.032939 |
| C | 6.924385  | 3.779592  | -0.263031 |

|    |          |           |           |
|----|----------|-----------|-----------|
| C  | 5.571795 | 3.974653  | -0.025993 |
| C  | 4.822875 | 2.904888  | 0.451223  |
| C  | 5.376883 | 1.643888  | 0.704754  |
| H  | 8.591220 | 2.407941  | -0.219464 |
| H  | 5.105957 | 4.936401  | -0.205954 |
| Cl | 3.125634 | 3.201970  | 0.742319  |
| Cl | 7.882980 | 5.106286  | -0.863397 |
| Cl | 7.533906 | -0.022434 | 0.725406  |
| C  | 4.573763 | 0.490676  | 1.247108  |
| H  | 3.595811 | 0.832750  | 1.607070  |
| H  | 5.067405 | 0.047239  | 2.116986  |
| N  | 3.863125 | -1.727080 | 0.674115  |
| C  | 4.277042 | -0.585088 | 0.249305  |
| C  | 4.370661 | -0.384215 | -1.218306 |
| H  | 3.810011 | 0.516954  | -1.488372 |
| H  | 5.415886 | -0.218711 | -1.501272 |
| H  | 3.977169 | -1.239298 | -1.772649 |
| O  | 3.576005 | -1.934267 | 1.980387  |
| C  | 4.277273 | -3.099482 | 2.580482  |
| C  | 5.770599 | -2.813707 | 2.605574  |
| H  | 6.288134 | -3.643221 | 3.098270  |
| H  | 6.178399 | -2.724853 | 1.592821  |
| H  | 5.985619 | -1.896003 | 3.162006  |
| C  | 3.670658 | -3.120984 | 3.973670  |
| H  | 2.592109 | -3.303668 | 3.923966  |
| H  | 4.131918 | -3.922303 | 4.558610  |
| H  | 3.846469 | -2.170226 | 4.487694  |
| C  | 3.948616 | -4.365200 | 1.801798  |
| H  | 4.396944 | -5.219934 | 2.317952  |
| H  | 2.868535 | -4.529511 | 1.749184  |
| H  | 4.361175 | -4.350759 | 0.786975  |
| H  | 3.492264 | -2.433784 | 0.028321  |

# A7uS

| Coordinates (Angstroms) |           |          |           |
|-------------------------|-----------|----------|-----------|
|                         | X         | Y        | Z         |
| Ir                      | 0.460948  | 0.511122 | -0.287311 |
| C                       | 1.175840  | 2.381799 | -0.113939 |
| N                       | -0.094350 | 1.027127 | 1.656544  |
| C                       | 1.795328  | 3.147906 | -1.105303 |
| C                       | 2.287045  | 4.428275 | -0.837282 |

|   |           |           |           |
|---|-----------|-----------|-----------|
| C | 2.177046  | 4.989141  | 0.445339  |
| C | 1.556867  | 4.249850  | 1.440962  |
| C | 1.052797  | 2.971634  | 1.175286  |
| C | 0.070677  | 2.630897  | 3.534642  |
| C | 0.321046  | 2.169717  | 2.131845  |
| C | -0.973542 | 0.172914  | 2.378285  |
| C | -0.624409 | -1.156764 | 2.628240  |
| C | -1.533940 | -2.019754 | 3.215864  |
| C | -2.818405 | -1.571619 | 3.552574  |
| C | -3.166906 | -0.240192 | 3.326074  |
| C | -2.239228 | 0.620085  | 2.741582  |
| O | -3.650258 | -2.506519 | 4.085178  |
| C | -4.975147 | -2.110789 | 4.402536  |
| H | 2.560991  | 5.978164  | 0.665943  |
| H | -0.249019 | 1.814442  | 4.184726  |
| H | 0.983488  | 3.068302  | 3.950515  |
| H | 0.359472  | -1.512780 | 2.342785  |
| H | -2.520120 | 1.646437  | 2.532398  |
| H | -5.471962 | -3.005775 | 4.780610  |
| H | -4.984724 | -1.335251 | 5.177753  |
| H | -5.503990 | -1.746940 | 3.513455  |
| C | 0.018990  | 0.429098  | -2.454140 |
| C | 0.778045  | -0.721524 | -2.078266 |
| C | -0.064993 | -1.533794 | -1.236802 |
| C | -1.298107 | -0.861459 | -1.070018 |
| C | -1.274932 | 0.352800  | -1.844518 |
| C | -2.428405 | 1.271090  | -2.151620 |
| C | -2.455357 | -1.378867 | -0.259116 |
| C | -3.287848 | 1.619686  | -0.957748 |
| C | -3.684441 | -1.522562 | -1.121359 |
| C | -3.889426 | -2.730613 | -1.842218 |
| C | -4.967972 | -2.897812 | -2.665313 |
| C | -5.901364 | -1.843960 | -2.838134 |
| C | -5.703990 | -0.614309 | -2.147287 |
| C | -4.574436 | -0.478337 | -1.277884 |
| C | -3.012336 | 2.822484  | -0.232365 |
| C | -3.790876 | 3.199846  | 0.833020  |
| C | -4.847958 | 2.360080  | 1.275261  |
| C | -5.114195 | 1.141611  | 0.595276  |
| C | -4.321369 | 0.804555  | -0.551182 |
| C | -5.619257 | 2.694127  | 2.419812  |
| C | -6.606353 | 1.853927  | 2.873937  |
| C | -6.866846 | 0.637482  | 2.202819  |
| C | -6.136484 | 0.290572  | 1.091576  |

|   |           |           |           |
|---|-----------|-----------|-----------|
| H | 0.345521  | 1.211257  | -3.128450 |
| H | 1.761235  | -0.983758 | -2.445781 |
| H | 0.192847  | -2.484903 | -0.795914 |
| H | -2.030434 | 2.186242  | -2.595922 |
| H | -3.056450 | 0.796376  | -2.915603 |
| H | -2.175670 | -2.338769 | 0.178098  |
| H | -2.669807 | -0.698447 | 0.566562  |
| H | -3.603314 | 4.122093  | 1.372373  |
| H | -5.410691 | 3.628062  | 2.936505  |
| H | -7.187479 | 2.120701  | 3.752549  |
| H | -7.645923 | -0.025449 | 2.568682  |
| H | -6.336958 | -0.650916 | 0.589773  |
| O | -2.944680 | -3.729276 | -1.723760 |
| C | -3.279051 | -4.731913 | -0.769703 |
| H | -4.197779 | -5.258250 | -1.056981 |
| H | -2.446088 | -5.438562 | -0.753646 |
| H | -3.411915 | -4.300063 | 0.231044  |
| O | -1.951399 | 3.530232  | -0.690818 |
| C | -1.630150 | 4.755925  | -0.057893 |
| H | -1.414720 | 4.611222  | 1.006190  |
| H | -0.734649 | 5.122719  | -0.561419 |
| H | -2.442641 | 5.483708  | -0.174581 |
| H | -1.275335 | -3.056950 | 3.409010  |
| H | -0.703170 | 3.407056  | 3.552161  |
| H | 1.459008  | 4.688629  | 2.430803  |
| H | 1.925111  | 2.761828  | -2.113087 |
| O | 2.872127  | 5.060607  | -1.889351 |
| C | 3.424254  | 6.350909  | -1.684342 |
| H | 3.847772  | 6.650459  | -2.644546 |
| H | 2.654946  | 7.073876  | -1.388308 |
| H | 4.219161  | 6.329308  | -0.929584 |
| H | -4.152219 | 0.141682  | 3.570796  |
| H | -5.098985 | -3.834512 | -3.200665 |
| C | -7.019053 | -1.983654 | -3.703379 |
| C | -7.902316 | -0.949626 | -3.881091 |
| C | -6.632636 | 0.440888  | -2.361568 |
| C | -7.703424 | 0.276688  | -3.204406 |
| H | -8.753261 | -1.066071 | -4.546407 |
| H | -7.159962 | -2.927489 | -4.224485 |
| H | -8.403692 | 1.093455  | -3.355813 |
| H | -6.485920 | 1.389290  | -1.853969 |
| H | 1.865615  | 0.137256  | 0.388394  |
| C | 6.050263  | 0.415248  | -0.702968 |
| C | 7.330949  | 0.953247  | -0.646829 |

|    |           |           |           |
|----|-----------|-----------|-----------|
| C  | 8.387131  | 0.112166  | -0.329610 |
| C  | 8.190075  | -1.236841 | -0.069880 |
| C  | 6.895382  | -1.732573 | -0.138469 |
| C  | 5.786012  | -0.938267 | -0.457993 |
| H  | 7.495257  | 2.006381  | -0.842959 |
| H  | 9.020205  | -1.886501 | 0.181689  |
| Cl | 6.667886  | -3.431074 | 0.211997  |
| Cl | 10.001253 | 0.766636  | -0.247252 |
| Cl | 4.745610  | 1.511836  | -1.080954 |
| C  | 4.400696  | -1.527548 | -0.528831 |
| H  | 4.402653  | -2.479372 | -1.066642 |
| H  | 3.725070  | -0.870633 | -1.091852 |
| N  | 2.814329  | -2.591192 | 0.921235  |
| C  | 3.748719  | -1.713748 | 0.805287  |
| C  | 4.073184  | -0.871208 | 1.983145  |
| H  | 5.133866  | -0.976451 | 2.232669  |
| H  | 3.893760  | 0.178936  | 1.723835  |
| H  | 3.468275  | -1.128966 | 2.855312  |
| O  | 2.368274  | -3.288868 | -0.145453 |
| C  | 2.007785  | -4.697137 | 0.162184  |
| C  | 0.904274  | -4.726983 | 1.214638  |
| H  | 0.498642  | -5.741965 | 1.268161  |
| H  | 1.268083  | -4.482098 | 2.219214  |
| H  | 0.087673  | -4.049005 | 0.945234  |
| C  | 1.501241  | -5.181106 | -1.187335 |
| H  | 2.263235  | -5.043475 | -1.961155 |
| H  | 1.268788  | -6.248001 | -1.119107 |
| H  | 0.592400  | -4.648395 | -1.484701 |
| C  | 3.261833  | -5.434765 | 0.604574  |
| H  | 3.016578  | -6.484406 | 0.795835  |
| H  | 4.029570  | -5.397436 | -0.174496 |
| H  | 3.671774  | -5.016384 | 1.530726  |
| H  | 2.277806  | -2.694586 | 1.784124  |

## B1

| Coordinates (Angstroms) |          |           |           |
|-------------------------|----------|-----------|-----------|
|                         | X        | Y         | Z         |
| Ir                      | 1.487418 | -0.369189 | 0.404324  |
| C                       | 2.690633 | 0.132770  | -1.152726 |
| N                       | 0.881355 | 1.590072  | -0.002236 |
| C                       | 3.689141 | -0.642291 | -1.761327 |

|   |           |           |           |
|---|-----------|-----------|-----------|
| C | 4.534177  | -0.085872 | -2.723350 |
| C | 4.394937  | 1.249366  | -3.113049 |
| C | 3.407867  | 2.050143  | -2.557205 |
| C | 2.576985  | 1.466088  | -1.585064 |
| C | 1.338631  | 3.681683  | -1.262064 |
| C | 1.547054  | 2.239226  | -0.907752 |
| C | -0.127379 | 2.204440  | 0.793723  |
| C | 0.030536  | 2.212989  | 2.177277  |
| C | -0.960204 | 2.741995  | 3.001427  |
| C | -2.109838 | 3.266979  | 2.398823  |
| C | -2.291887 | 3.258090  | 1.012005  |
| C | -1.287219 | 2.710953  | 0.213802  |
| O | -3.125872 | 3.768436  | 3.188729  |
| C | -2.935755 | 5.125518  | 3.575174  |
| H | 5.073536  | 1.657548  | -3.858157 |
| H | 0.955508  | 4.234680  | -0.399757 |
| H | 0.932366  | 1.793264  | 2.613555  |
| H | -1.417929 | 2.656194  | -0.863028 |
| H | -3.799415 | 5.401497  | 4.184626  |
| H | -2.021029 | 5.248274  | 4.167405  |
| H | -2.884118 | 5.784701  | 2.699471  |
| C | 1.226862  | -2.489415 | 0.011333  |
| C | 1.603231  | -2.339601 | 1.366663  |
| C | 0.520274  | -1.662570 | 2.056816  |
| C | -0.470097 | -1.333548 | 1.122260  |
| C | -0.017137 | -1.786054 | -0.193246 |
| C | -0.836133 | -1.902856 | -1.450059 |
| C | -1.770360 | -0.634010 | 1.401143  |
| C | -1.683055 | -0.702882 | -1.803737 |
| C | -2.921649 | -1.529713 | 1.009920  |
| C | -3.402470 | -2.478733 | 1.953813  |
| C | -4.405868 | -3.353322 | 1.643188  |
| C | -4.973635 | -3.350940 | 0.344212  |
| C | -4.493236 | -2.427195 | -0.627026 |
| C | -3.460115 | -1.502878 | -0.262263 |
| C | -1.182863 | 0.240168  | -2.756844 |
| C | -1.956407 | 1.289059  | -3.187760 |
| C | -3.263923 | 1.472098  | -2.664332 |
| C | -3.757285 | 0.584331  | -1.670687 |
| C | -2.940184 | -0.524540 | -1.268422 |
| C | -4.093809 | 2.531860  | -3.117793 |
| C | -5.355219 | 2.706920  | -2.604131 |
| C | -5.836350 | 1.842085  | -1.595720 |
| C | -5.052854 | 0.811889  | -1.135971 |

|   |           |           |           |
|---|-----------|-----------|-----------|
| H | 1.799291  | -2.981545 | -0.760698 |
| H | 2.515342  | -2.706151 | 1.816143  |
| H | 0.502307  | -1.402237 | 3.107811  |
| H | -0.155148 | -2.124155 | -2.274693 |
| H | -1.488785 | -2.776599 | -1.333669 |
| H | -1.815199 | -0.374330 | 2.460433  |
| H | -1.822602 | 0.296463  | 0.833813  |
| H | -1.596819 | 1.988728  | -3.934526 |
| H | -3.712481 | 3.203108  | -3.883573 |
| H | -5.983039 | 3.517117  | -2.964740 |
| H | -6.827328 | 1.996852  | -1.178553 |
| H | -5.429270 | 0.157551  | -0.356127 |
| O | -2.801585 | -2.519405 | 3.193210  |
| C | -3.520948 | -1.824996 | 4.207975  |
| H | -4.502503 | -2.284296 | 4.378749  |
| H | -2.923199 | -1.895855 | 5.119188  |
| H | -3.660973 | -0.768690 | 3.944351  |
| O | 0.071393  | -0.013955 | -3.201492 |
| C | 0.619076  | 0.831162  | -4.197162 |
| H | 0.693237  | 1.866205  | -3.843732 |
| H | 1.619231  | 0.444007  | -4.395850 |
| H | 0.021658  | 0.795226  | -5.116689 |
| S | 4.383193  | 0.418707  | 1.919639  |
| C | 5.332382  | 1.460485  | 0.834248  |
| H | 5.113401  | 1.189567  | -0.200441 |
| H | 5.069052  | 2.504633  | 1.017417  |
| H | 6.392989  | 1.300097  | 1.044180  |
| O | 4.704951  | 0.820318  | 3.299437  |
| O | 4.713128  | -0.973077 | 1.578997  |
| O | 2.934765  | 0.777597  | 1.620469  |
| H | 0.560940  | 3.725804  | -2.038541 |
| H | -4.752034 | -4.065830 | 2.387197  |
| C | -6.000363 | -4.266057 | -0.011519 |
| C | -6.523781 | -4.274825 | -1.278949 |
| C | -5.047537 | -2.473732 | -1.935817 |
| C | -6.036422 | -3.371045 | -2.251997 |
| H | -7.307857 | -4.979264 | -1.541937 |
| H | -6.360093 | -4.963665 | 0.740858  |
| H | -6.447981 | -3.391234 | -3.257185 |
| H | -4.678393 | -1.790802 | -2.694340 |
| C | -3.560192 | 3.798598  | 0.412293  |
| H | -4.435751 | 3.252401  | 0.778900  |
| H | -3.709385 | 4.853696  | 0.669153  |
| H | -3.537829 | 3.716852  | -0.677201 |

|   |           |           |           |
|---|-----------|-----------|-----------|
| C | -0.804068 | 2.728516  | 4.498389  |
| H | -0.354931 | 3.660478  | 4.863376  |
| H | -1.773190 | 2.614377  | 4.993693  |
| H | -0.152895 | 1.906365  | 4.811600  |
| C | 3.202039  | 3.491254  | -2.953819 |
| C | 2.630193  | 4.308190  | -1.795384 |
| H | 4.146572  | 3.924500  | -3.300484 |
| H | 2.504819  | 3.538111  | -3.803970 |
| H | 3.368473  | 4.361984  | -0.985401 |
| H | 2.425206  | 5.334207  | -2.117446 |
| H | 5.319089  | -0.682581 | -3.177310 |
| O | 3.777466  | -1.943413 | -1.367693 |
| C | 4.980249  | -2.658938 | -1.570289 |
| H | 5.819765  | -2.121477 | -1.110022 |
| H | 5.189534  | -2.802962 | -2.638527 |
| C | 4.794966  | -4.015101 | -0.932586 |
| H | 5.697844  | -4.620133 | -1.111196 |
| H | 3.944019  | -4.531024 | -1.405122 |
| O | 4.565257  | -3.845749 | 0.446520  |
| C | 4.260219  | -5.056557 | 1.099039  |
| H | 4.126892  | -4.830968 | 2.160067  |
| H | 3.332164  | -5.501535 | 0.708686  |
| H | 5.071923  | -5.792524 | 0.992433  |

## B2

|    | Coordinates (Angstroms) |           |           |
|----|-------------------------|-----------|-----------|
|    | X                       | Y         | Z         |
| Ir | 1.660562                | 0.063048  | -0.391893 |
| C  | 2.483571                | 1.930126  | -0.479498 |
| N  | 0.942426                | 0.950148  | 1.367893  |
| C  | 3.368412                | 2.430990  | -1.436789 |
| C  | 3.898413                | 3.716251  | -1.309949 |
| C  | 3.593837                | 4.510665  | -0.204535 |
| C  | 2.743471                | 4.041879  | 0.789297  |
| C  | 2.195006                | 2.759502  | 0.619841  |
| C  | 0.946477                | 2.958989  | 2.836505  |
| C  | 1.319304                | 2.168772  | 1.617836  |
| C  | 0.076112                | 0.220281  | 2.236753  |
| C  | 0.485139                | -1.023957 | 2.707612  |
| C  | -0.353696               | -1.786565 | 3.520547  |
| C  | -1.615462               | -1.270207 | 3.834727  |

|   |           |           |           |
|---|-----------|-----------|-----------|
| C | -2.052416 | -0.030153 | 3.355851  |
| C | -1.192345 | 0.709367  | 2.545968  |
| O | -2.495035 | -2.011867 | 4.597921  |
| C | -2.299018 | -1.880366 | 6.001746  |
| H | 4.041926  | 5.497156  | -0.115613 |
| H | 0.720343  | 2.292184  | 3.672891  |
| H | 1.461103  | -1.414403 | 2.434185  |
| H | -1.522284 | 1.658032  | 2.132666  |
| H | -3.128094 | -2.403841 | 6.483539  |
| H | -1.352487 | -2.334652 | 6.318987  |
| H | -2.308718 | -0.826335 | 6.305770  |
| C | 1.274086  | -0.212088 | -2.526678 |
| C | 1.867913  | -1.403752 | -2.049032 |
| C | 0.942982  | -2.030073 | -1.126863 |
| C | -0.180503 | -1.201424 | -0.999810 |
| C | 0.029150  | -0.014700 | -1.825719 |
| C | -0.999438 | 0.993667  | -2.259322 |
| C | -1.413854 | -1.500100 | -0.198312 |
| C | -1.961874 | 1.487918  | -1.204973 |
| C | -2.574057 | -1.635499 | -1.156227 |
| C | -2.794387 | -2.890450 | -1.789079 |
| C | -3.778915 | -3.056321 | -2.722899 |
| C | -4.590579 | -1.957536 | -3.103277 |
| C | -4.376830 | -0.686551 | -2.498606 |
| C | -3.351377 | -0.548952 | -1.506513 |
| C | -1.720086 | 2.759539  | -0.597104 |
| C | -2.625743 | 3.312294  | 0.273860  |
| C | -3.807939 | 2.603930  | 0.615485  |
| C | -4.038780 | 1.311758  | 0.071855  |
| C | -3.097144 | 0.781168  | -0.870903 |
| C | -4.768532 | 3.164162  | 1.499092  |
| C | -5.903481 | 2.469220  | 1.836577  |
| C | -6.121728 | 1.173145  | 1.317365  |
| C | -5.209196 | 0.607712  | 0.460726  |
| H | 1.695225  | 0.467798  | -3.253466 |
| H | 2.833253  | -1.793499 | -2.340046 |
| H | 1.114992  | -2.948609 | -0.580273 |
| H | -0.473610 | 1.845382  | -2.695824 |
| H | -1.573762 | 0.527038  | -3.069268 |
| H | -1.255758 | -2.417163 | 0.371168  |
| H | -1.610462 | -0.697317 | 0.512608  |
| H | -2.465844 | 4.291210  | 0.712704  |
| H | -4.588299 | 4.156425  | 1.905586  |
| H | -6.632072 | 2.909652  | 2.511622  |

|   |           |           |           |
|---|-----------|-----------|-----------|
| H | -7.014087 | 0.621813  | 1.599886  |
| H | -5.384439 | -0.390202 | 0.071616  |
| H | 0.022320  | 3.509636  | 2.608217  |
| H | -3.923192 | -4.026135 | -3.191671 |
| C | -5.602099 | -2.098118 | -4.090813 |
| C | -6.365949 | -1.024151 | -4.470059 |
| C | -5.178347 | 0.408613  | -2.923607 |
| C | -6.147505 | 0.243240  | -3.881175 |
| H | -7.136312 | -1.140812 | -5.227168 |
| H | -5.755733 | -3.073935 | -4.544987 |
| H | -6.750199 | 1.091799  | -4.192648 |
| H | -5.017617 | 1.388480  | -2.485301 |
| C | -3.434052 | 0.460283  | 3.689094  |
| H | -4.197128 | -0.228702 | 3.310929  |
| H | -3.582269 | 0.540080  | 4.772241  |
| H | -3.612616 | 1.444513  | 3.249747  |
| C | 0.090805  | -3.130864 | 4.031941  |
| H | 0.605448  | -3.034250 | 4.996249  |
| H | -0.762266 | -3.800631 | 4.177508  |
| H | 0.789173  | -3.595735 | 3.329604  |
| C | 2.407660  | 4.851827  | 2.017495  |
| C | 2.054696  | 3.951733  | 3.201046  |
| H | 3.249767  | 5.503982  | 2.273563  |
| H | 1.557418  | 5.513686  | 1.797237  |
| H | 2.946488  | 3.397462  | 3.519575  |
| H | 1.727192  | 4.556787  | 4.052503  |
| H | 4.575520  | 4.096125  | -2.070226 |
| O | 3.699185  | 1.621101  | -2.490570 |
| C | 5.058924  | 1.602277  | -2.906637 |
| H | 5.716383  | 1.805013  | -2.052459 |
| H | 5.240773  | 2.359786  | -3.679813 |
| C | 5.352163  | 0.231559  | -3.467038 |
| H | 6.376784  | 0.229845  | -3.870498 |
| H | 4.662450  | 0.001824  | -4.294638 |
| O | 5.217641  | -0.722935 | -2.436879 |
| C | 5.623025  | -2.011506 | -2.847919 |
| H | 5.436603  | -2.690013 | -2.013719 |
| H | 5.052261  | -2.352512 | -3.724794 |
| H | 6.694221  | -2.029485 | -3.100313 |
| H | 3.317144  | -0.103881 | 0.249697  |
| S | 3.532193  | -3.444202 | 1.282832  |
| C | 4.627133  | -4.684526 | 1.949935  |
| H | 4.516514  | -5.605903 | 1.372988  |
| H | 5.656666  | -4.324120 | 1.883525  |

|   |           |           |           |
|---|-----------|-----------|-----------|
| H | 4.365916  | -4.867801 | 2.995176  |
| O | 3.727155  | -2.241643 | 2.135254  |
| H | 2.886254  | -0.615265 | 0.772381  |
| O | 2.162986  | -4.007292 | 1.385702  |
| O | 3.958069  | -3.228780 | -0.120365 |
| O | -1.956028 | -3.934437 | -1.466157 |
| C | -2.481725 | -4.813069 | -0.475097 |
| H | -3.376406 | -5.329299 | -0.844562 |
| H | -1.700214 | -5.544000 | -0.258553 |
| H | -2.735750 | -4.269771 | 0.444058  |
| O | -0.565608 | 3.359041  | -0.978500 |
| C | -0.333475 | 4.693297  | -0.563026 |
| H | -1.133088 | 5.357384  | -0.913563 |
| H | -0.249977 | 4.764327  | 0.527037  |
| H | 0.611775  | 4.987450  | -1.020311 |

### B3

|    | Coordinates (Angstroms) |           |           |
|----|-------------------------|-----------|-----------|
|    | X                       | Y         | Z         |
| Ir | -1.334588               | -0.872726 | -0.470158 |
| C  | -2.558042               | -1.090766 | 1.121048  |
| N  | -1.132962               | 0.956245  | 0.500427  |
| C  | -3.375120               | -2.192789 | 1.442780  |
| C  | -4.210143               | -2.165645 | 2.554113  |
| C  | -4.274121               | -1.029743 | 3.376891  |
| C  | -3.499243               | 0.082436  | 3.102976  |
| C  | -2.645049               | 0.021032  | 1.982003  |
| C  | -1.894982               | 2.435183  | 2.358643  |
| C  | -1.830784               | 1.149475  | 1.585281  |
| C  | -0.347133               | 1.987791  | -0.088278 |
| C  | -0.607462               | 2.345000  | -1.408180 |
| C  | 0.141640                | 3.328964  | -2.047673 |
| C  | 1.175240                | 3.939607  | -1.328514 |
| C  | 1.470423                | 3.581476  | -0.008154 |
| C  | 0.700666                | 2.591726  | 0.603162  |
| O  | 1.968893                | 4.892633  | -1.937652 |
| C  | 1.421616                | 6.205809  | -1.902524 |
| H  | -4.953635               | -1.028204 | 4.225999  |
| H  | -1.717443               | 3.286806  | 1.695112  |
| H  | -1.403111               | 1.845170  | -1.948927 |
| H  | 0.929238                | 2.277992  | 1.617375  |

|   |           |           |           |
|---|-----------|-----------|-----------|
| H | 2.165841  | 6.867756  | -2.351388 |
| H | 0.489274  | 6.267892  | -2.477238 |
| H | 1.226083  | 6.526338  | -0.871662 |
| C | -0.564620 | -2.943015 | -0.740690 |
| C | -1.110627 | -2.461746 | -1.968517 |
| C | -0.253124 | -1.390645 | -2.425857 |
| C | 0.754233  | -1.185212 | -1.453285 |
| C | 0.586699  | -2.166892 | -0.405870 |
| C | 1.525079  | -2.463762 | 0.730416  |
| C | 1.843870  | -0.144492 | -1.524529 |
| C | 2.008602  | -1.243995 | 1.478308  |
| C | 3.215074  | -0.767155 | -1.405812 |
| C | 3.869608  | -1.213581 | -2.586958 |
| C | 5.100020  | -1.808628 | -2.546109 |
| C | 5.745247  | -2.022143 | -1.302247 |
| C | 5.101623  | -1.607534 | -0.101822 |
| C | 3.825056  | -0.960543 | -0.180044 |
| C | 1.303159  | -0.835080 | 2.653402  |
| C | 1.750068  | 0.213213  | 3.416820  |
| C | 2.915178  | 0.928250  | 3.030884  |
| C | 3.597064  | 0.579539  | 1.833359  |
| C | 3.119416  | -0.538669 | 1.070323  |
| C | 3.415976  | 1.991347  | 3.827727  |
| C | 4.546427  | 2.677005  | 3.457319  |
| C | 5.212003  | 2.347780  | 2.255298  |
| C | 4.741744  | 1.332015  | 1.458523  |
| H | -0.954838 | -3.762551 | -0.153191 |
| H | -1.955179 | -2.882869 | -2.495735 |
| H | -0.364815 | -0.825726 | -3.342559 |
| H | 1.018260  | -3.137016 | 1.425723  |
| H | 2.391750  | -3.006910 | 0.334864  |
| H | 1.749669  | 0.391623  | -2.471122 |
| H | 1.711663  | 0.588090  | -0.726000 |
| H | 1.240230  | 0.507387  | 4.328019  |
| H | 2.892095  | 2.247348  | 4.745560  |
| H | 4.926018  | 3.480884  | 4.082032  |
| H | 6.094893  | 2.905896  | 1.956748  |
| H | 5.254594  | 1.095088  | 0.531385  |
| O | 3.212748  | -1.058903 | -3.788841 |
| C | 3.659139  | 0.058736  | -4.550044 |
| H | 4.717457  | -0.044846 | -4.819355 |
| H | 3.054403  | 0.080876  | -5.459282 |
| H | 3.519422  | 0.996666  | -3.997030 |
| O | 0.206649  | -1.576938 | 2.945824  |

|   |           |           |           |
|---|-----------|-----------|-----------|
| C | -0.464866 | -1.325819 | 4.167371  |
| H | -0.845847 | -0.300262 | 4.214936  |
| H | -1.303484 | -2.022887 | 4.195558  |
| H | 0.198299  | -1.512437 | 5.021418  |
| H | -1.082700 | 2.434590  | 3.099211  |
| H | 5.572132  | -2.137508 | -3.468088 |
| C | 7.012577  | -2.660517 | -1.229027 |
| C | 7.614237  | -2.888925 | -0.018285 |
| C | 5.746296  | -1.874760 | 1.137526  |
| C | 6.969321  | -2.495644 | 1.177861  |
| H | 8.583052  | -3.378325 | 0.027479  |
| H | 7.495584  | -2.968682 | -2.153099 |
| H | 7.446368  | -2.689383 | 2.134524  |
| H | 5.258548  | -1.587749 | 2.063594  |
| C | 2.605055  | 4.248629  | 0.719044  |
| H | 3.552487  | 4.120834  | 0.184667  |
| H | 2.434839  | 5.327276  | 0.818510  |
| H | 2.718740  | 3.831988  | 1.723183  |
| C | -0.163786 | 3.709315  | -3.472014 |
| H | -0.904410 | 4.517007  | -3.515299 |
| H | 0.734256  | 4.052194  | -3.994413 |
| H | -0.581474 | 2.856613  | -4.016324 |
| C | -3.535834 | 1.340773  | 3.936199  |
| C | -3.239287 | 2.573354  | 3.080393  |
| H | -4.510519 | 1.439544  | 4.426641  |
| H | -2.785889 | 1.274830  | 4.739040  |
| H | -4.035861 | 2.704219  | 2.336373  |
| H | -3.222619 | 3.474214  | 3.702859  |
| H | -4.837024 | -3.019660 | 2.793020  |
| O | -3.291362 | -3.267374 | 0.599481  |
| C | -4.353460 | -4.201051 | 0.555682  |
| H | -5.312780 | -3.680846 | 0.431484  |
| H | -4.395493 | -4.805887 | 1.471553  |
| C | -4.088168 | -5.111568 | -0.619590 |
| H | -4.856004 | -5.900452 | -0.643685 |
| H | -3.107548 | -5.597945 | -0.497974 |
| O | -4.117520 | -4.348970 | -1.806268 |
| C | -3.795544 | -5.115874 | -2.945388 |
| H | -3.843358 | -4.449560 | -3.810391 |
| H | -2.783015 | -5.540212 | -2.872256 |
| H | -4.510478 | -5.940097 | -3.090782 |
| H | -2.665718 | -0.264364 | -1.165520 |
| S | -4.568190 | 2.671079  | -1.643037 |
| C | -5.355588 | 3.965235  | -0.738032 |

|   |           |          |           |
|---|-----------|----------|-----------|
| H | -5.898476 | 4.579814 | -1.460560 |
| H | -6.049799 | 3.528640 | -0.017391 |
| H | -4.591705 | 4.560992 | -0.234420 |
| O | -3.832037 | 1.954626 | -0.416143 |
| H | -3.382589 | 1.118484 | -0.707708 |
| O | -3.576429 | 3.233086 | -2.551191 |
| O | -5.556762 | 1.759502 | -2.204346 |

#### B4

|    | Coordinates (Angstroms) |           |           |
|----|-------------------------|-----------|-----------|
|    | X                       | Y         | Z         |
| Ir | 1.856116                | -0.278588 | 0.867497  |
| C  | 3.253683                | 0.414192  | -0.415262 |
| N  | 1.269566                | 1.694272  | 0.588779  |
| C  | 4.350062                | -0.275513 | -0.973434 |
| C  | 5.265271                | 0.370740  | -1.796656 |
| C  | 5.126016                | 1.735975  | -2.093531 |
| C  | 4.066589                | 2.461536  | -1.581098 |
| C  | 3.148462                | 1.778633  | -0.755395 |
| C  | 1.787961                | 3.915236  | -0.423667 |
| C  | 2.013027                | 2.452113  | -0.167549 |
| C  | 0.096858                | 2.182350  | 1.231783  |
| C  | -0.031185               | 2.031731  | 2.610556  |
| C  | -1.200202               | 2.411045  | 3.266595  |
| C  | -2.238347               | 2.958139  | 2.502486  |
| C  | -2.130809               | 3.122426  | 1.117490  |
| C  | -0.954880               | 2.714497  | 0.488431  |
| O  | -3.431099               | 3.296676  | 3.112380  |
| C  | -3.445995               | 4.601909  | 3.679256  |
| H  | 5.864313                | 2.218713  | -2.729671 |
| H  | 1.283213                | 4.379505  | 0.429106  |
| H  | 0.784074                | 1.585667  | 3.172233  |
| H  | -0.869189               | 2.785870  | -0.592081 |
| H  | -4.443669               | 4.748398  | 4.099671  |
| H  | -2.701054               | 4.701809  | 4.478150  |
| H  | -3.256417               | 5.368537  | 2.917739  |
| C  | 1.677924                | -2.432327 | 0.302136  |
| C  | 1.854611                | -2.323902 | 1.712753  |
| C  | 0.667918                | -1.700546 | 2.248112  |
| C  | -0.190260               | -1.388706 | 1.163224  |
| C  | 0.418509                | -1.857046 | -0.056071 |

|   |           |           |           |
|---|-----------|-----------|-----------|
| C | -0.200333 | -1.936834 | -1.424616 |
| C | -1.543234 | -0.733038 | 1.271220  |
| C | -0.954717 | -0.699695 | -1.854722 |
| C | -2.613869 | -1.612622 | 0.670746  |
| C | -3.228118 | -2.600491 | 1.488579  |
| C | -4.178497 | -3.451063 | 0.995429  |
| C | -4.552156 | -3.384599 | -0.370448 |
| C | -3.933786 | -2.422065 | -1.217978 |
| C | -2.963182 | -1.524819 | -0.664202 |
| C | -0.274951 | 0.286740  | -2.636911 |
| C | -0.939232 | 1.383347  | -3.124914 |
| C | -2.317590 | 1.567276  | -2.835732 |
| C | -2.998263 | 0.633783  | -2.007508 |
| C | -2.281362 | -0.515142 | -1.532388 |
| C | -3.034014 | 2.671505  | -3.368194 |
| C | -4.368207 | 2.843990  | -3.093408 |
| C | -5.040434 | 1.931639  | -2.249507 |
| C | -4.368685 | 0.860462  | -1.711704 |
| H | 2.375757  | -2.883526 | -0.389079 |
| H | 2.686255  | -2.719204 | 2.280017  |
| H | 0.458388  | -1.501962 | 3.291262  |
| H | 0.592675  | -2.145412 | -2.146688 |
| H | -0.885035 | -2.793717 | -1.449657 |
| H | -1.755503 | -0.534380 | 2.323376  |
| H | -1.532321 | 0.228345  | 0.755156  |
| H | -0.438276 | 2.118085  | -3.746170 |
| H | -2.506101 | 3.375358  | -4.007420 |
| H | -4.906681 | 3.687744  | -3.515971 |
| H | -6.091482 | 2.083146  | -2.020588 |
| H | -4.893226 | 0.171624  | -1.056919 |
| O | -2.807866 | -2.705283 | 2.796927  |
| C | -3.691818 | -2.115135 | 3.744603  |
| H | -4.662978 | -2.625081 | 3.750953  |
| H | -3.217665 | -2.226575 | 4.722260  |
| H | -3.845677 | -1.049234 | 3.532488  |
| O | 1.035769  | 0.025873  | -2.862944 |
| C | 1.756769  | 0.892859  | -3.719451 |
| H | 1.766038  | 1.919373  | -3.337540 |
| H | 2.776991  | 0.507302  | -3.742210 |
| H | 1.335407  | 0.881390  | -4.732378 |
| H | 1.111866  | 4.016537  | -1.284152 |
| H | -4.630154 | -4.194909 | 1.646399  |
| C | -5.514336 | -4.277249 | -0.914597 |
| C | -5.843243 | -4.228517 | -2.245021 |

|   |           |           |           |
|---|-----------|-----------|-----------|
| C | -4.288086 | -2.407905 | -2.595436 |
| C | -5.217882 | -3.285611 | -3.094259 |
| H | -6.578169 | -4.917715 | -2.651718 |
| H | -5.981378 | -5.005138 | -0.255556 |
| H | -5.472587 | -3.260069 | -4.150134 |
| H | -3.809944 | -1.696048 | -3.260962 |
| C | -3.272876 | 3.705286  | 0.332737  |
| H | -4.204540 | 3.162090  | 0.519975  |
| H | -3.450445 | 4.752241  | 0.607464  |
| H | -3.062821 | 3.672499  | -0.739435 |
| C | -1.350487 | 2.210522  | 4.751152  |
| H | -1.088783 | 3.119497  | 5.306973  |
| H | -2.381803 | 1.953055  | 5.011209  |
| H | -0.692631 | 1.409443  | 5.102449  |
| C | 3.854446  | 3.927420  | -1.875632 |
| C | 3.111004  | 4.622695  | -0.734546 |
| H | 4.817980  | 4.416385  | -2.057842 |
| H | 3.270772  | 4.035355  | -2.802639 |
| H | 3.741179  | 4.627019  | 0.164172  |
| H | 2.908792  | 5.667401  | -0.992870 |
| H | 6.109857  | -0.169653 | -2.213370 |
| O | 4.448699  | -1.598954 | -0.646884 |
| C | 5.667016  | -2.282573 | -0.857776 |
| H | 6.495531  | -1.740652 | -0.381694 |
| H | 5.886643  | -2.394683 | -1.928346 |
| C | 5.507164  | -3.654244 | -0.245449 |
| H | 6.427065  | -4.234614 | -0.418002 |
| H | 4.675147  | -4.184467 | -0.734603 |
| O | 5.254584  | -3.508497 | 1.134557  |
| C | 4.973791  | -4.737759 | 1.766146  |
| H | 4.817266  | -4.530640 | 2.827825  |
| H | 4.065357  | -5.202831 | 1.354595  |
| H | 5.807692  | -5.448468 | 1.661575  |
| H | 2.875399  | 0.335558  | 1.953408  |

# B5fR

|    | Coordinates (Angstroms) |           |           |
|----|-------------------------|-----------|-----------|
|    | X                       | Y         | Z         |
| Ir | 0.138484                | -0.681987 | -0.071991 |
| C  | -0.639611               | -1.218333 | 1.710707  |
| N  | 0.380479                | 1.043381  | 1.064954  |

|   |           |           |           |
|---|-----------|-----------|-----------|
| C | -1.218247 | -2.455089 | 2.073274  |
| C | -1.762846 | -2.647394 | 3.337595  |
| C | -1.749899 | -1.618148 | 4.294539  |
| C | -1.189011 | -0.391258 | 3.997498  |
| C | -0.640405 | -0.222174 | 2.707512  |
| C | -0.066613 | 2.215371  | 3.223694  |
| C | -0.066330 | 1.035799  | 2.290638  |
| C | 0.987094  | 2.192690  | 0.485179  |
| C | 0.508880  | 2.666769  | -0.734029 |
| C | 1.117126  | 3.744640  | -1.374133 |
| C | 2.221916  | 4.340226  | -0.755618 |
| C | 2.727863  | 3.874689  | 0.462993  |
| C | 2.105466  | 2.784685  | 1.069752  |
| O | 2.880726  | 5.384241  | -1.375177 |
| C | 2.289970  | 6.658830  | -1.149521 |
| H | -2.195940 | -1.796199 | 5.270548  |
| H | -0.145034 | 3.149988  | 2.659163  |
| H | -0.330718 | 2.165101  | -1.204398 |
| H | 2.513075  | 2.375937  | 1.989789  |
| H | 2.968881  | 7.398598  | -1.580265 |
| H | 1.310629  | 6.741307  | -1.636928 |
| H | 2.171655  | 6.856166  | -0.076803 |
| C | 0.950016  | -2.609903 | -0.849272 |
| C | 0.116113  | -2.000717 | -1.833751 |
| C | 0.777351  | -0.789777 | -2.263082 |
| C | 1.971291  | -0.648428 | -1.507896 |
| C | 2.103533  | -1.792659 | -0.641616 |
| C | 3.287885  | -2.179877 | 0.200911  |
| C | 2.959497  | 0.485577  | -1.628128 |
| C | 3.857693  | -1.052650 | 1.030039  |
| C | 4.352154  | -0.020896 | -1.919893 |
| C | 4.746721  | -0.221066 | -3.271552 |
| C | 5.980896  | -0.712681 | -3.594630 |
| C | 6.898267  | -1.060692 | -2.571328 |
| C | 6.523808  | -0.884569 | -1.209087 |
| C | 5.231110  | -0.346967 | -0.903917 |
| C | 3.409234  | -0.893287 | 2.379462  |
| C | 3.936009  | 0.080797  | 3.189236  |
| C | 4.933028  | 0.960057  | 2.688477  |
| C | 5.360181  | 0.850965  | 1.337166  |
| C | 4.800634  | -0.187798 | 0.520147  |
| C | 5.523483  | 1.946006  | 3.522370  |
| C | 6.498113  | 2.784840  | 3.040453  |
| C | 6.908597  | 2.692233  | 1.691617  |

|    |           |           |           |
|----|-----------|-----------|-----------|
| C  | 6.344914  | 1.755620  | 0.859142  |
| H  | 0.751622  | -3.542481 | -0.337224 |
| H  | -0.795184 | -2.419581 | -2.241203 |
| H  | 0.435336  | -0.104226 | -3.028002 |
| H  | 2.985407  | -2.998319 | 0.858265  |
| H  | 4.074426  | -2.572959 | -0.454980 |
| H  | 2.621576  | 1.161208  | -2.415977 |
| H  | 2.980069  | 1.061326  | -0.700865 |
| H  | 3.621971  | 0.189209  | 4.221962  |
| H  | 5.195438  | 2.019614  | 4.556654  |
| H  | 6.948483  | 3.528306  | 3.692539  |
| H  | 7.665980  | 3.371429  | 1.310427  |
| H  | 6.659542  | 1.698631  | -0.178348 |
| O  | 3.834269  | 0.065541  | -4.264919 |
| C  | 4.003573  | 1.353736  | -4.848123 |
| H  | 4.973058  | 1.432794  | -5.355739 |
| H  | 3.199651  | 1.474506  | -5.577428 |
| H  | 3.931918  | 2.145647  | -4.091082 |
| O  | 2.468816  | -1.785312 | 2.772946  |
| C  | 2.038676  | -1.763329 | 4.121425  |
| H  | 1.600897  | -0.795551 | 4.387187  |
| H  | 1.273856  | -2.537227 | 4.200244  |
| H  | 2.868009  | -1.994302 | 4.801816  |
| H  | 0.898921  | 2.245189  | 3.747588  |
| H  | 6.248810  | -0.855054 | -4.638231 |
| C  | 8.177442  | -1.597112 | -2.878392 |
| C  | 9.047496  | -1.952906 | -1.879891 |
| C  | 7.444309  | -1.277078 | -0.198427 |
| C  | 8.672893  | -1.794290 | -0.524860 |
| H  | 10.022743 | -2.364346 | -2.124730 |
| H  | 8.451163  | -1.725489 | -3.922770 |
| H  | 9.362564  | -2.088819 | 0.261258  |
| H  | 7.167030  | -1.168289 | 0.845440  |
| H  | -1.344149 | -0.126514 | -0.315981 |
| C  | -6.114075 | 2.093150  | -1.307684 |
| C  | -7.030662 | 3.134802  | -1.239021 |
| C  | -6.580793 | 4.376281  | -0.815241 |
| C  | -5.254481 | 4.587626  | -0.470060 |
| C  | -4.371602 | 3.517370  | -0.548561 |
| C  | -4.761361 | 2.237035  | -0.967088 |
| H  | -8.068028 | 2.977008  | -1.510140 |
| H  | -4.910215 | 5.562515  | -0.145525 |
| Cl | -2.710627 | 3.842399  | -0.108922 |
| Cl | -7.707384 | 5.704032  | -0.717483 |

|    |           |           |           |
|----|-----------|-----------|-----------|
| Cl | -6.714056 | 0.550118  | -1.866051 |
| C  | -3.800540 | 1.069190  | -1.038925 |
| H  | -2.769905 | 1.429782  | -1.103980 |
| H  | -3.982698 | 0.469179  | -1.933633 |
| N  | -4.199162 | -1.023066 | 0.035589  |
| C  | -3.883979 | 0.211985  | 0.197535  |
| C  | -3.613901 | 0.793527  | 1.532258  |
| H  | -2.662951 | 1.330763  | 1.482607  |
| H  | -4.396926 | 1.522268  | 1.772479  |
| H  | -3.566621 | 0.032606  | 2.308500  |
| O  | -4.219092 | -1.885872 | 1.085980  |
| C  | -5.577143 | -2.358017 | 1.435519  |
| C  | -6.169453 | -3.137288 | 0.267652  |
| H  | -7.107053 | -3.604552 | 0.585825  |
| H  | -6.393914 | -2.490887 | -0.587124 |
| H  | -5.475688 | -3.919418 | -0.053657 |
| C  | -5.290637 | -3.262540 | 2.623528  |
| H  | -4.803818 | -2.703512 | 3.428985  |
| H  | -6.232317 | -3.670029 | 3.004365  |
| H  | -4.645857 | -4.096611 | 2.330819  |
| C  | -6.442000 | -1.171361 | 1.839844  |
| H  | -7.430635 | -1.534853 | 2.139081  |
| H  | -6.002687 | -0.637202 | 2.688277  |
| H  | -6.589118 | -0.468803 | 1.012484  |
| H  | -4.321914 | -1.452261 | -0.919363 |
| S  | -3.699063 | -3.257910 | -2.676229 |
| C  | -4.891926 | -4.423889 | -3.301733 |
| H  | -5.291311 | -4.056255 | -4.249919 |
| H  | -4.396177 | -5.385940 | -3.452651 |
| H  | -5.699303 | -4.530571 | -2.572791 |
| O  | -3.215676 | -3.791362 | -1.385377 |
| O  | -4.465728 | -1.979954 | -2.485114 |
| O  | -2.649642 | -3.131741 | -3.706770 |
| C  | 3.929859  | 4.532698  | 1.081679  |
| H  | 4.794839  | 4.491347  | 0.411469  |
| H  | 3.737342  | 5.591571  | 1.292517  |
| H  | 4.198632  | 4.042677  | 2.020898  |
| C  | 0.609883  | 4.230422  | -2.705586 |
| H  | -0.159618 | 5.003412  | -2.585682 |
| H  | 1.419277  | 4.661245  | -3.302809 |
| H  | 0.160085  | 3.407102  | -3.269840 |
| C  | -1.138388 | 0.754015  | 4.979578  |
| H  | -0.206196 | 0.701512  | 5.562614  |
| H  | -1.959934 | 0.671292  | 5.700049  |

|   |           |           |           |
|---|-----------|-----------|-----------|
| C | -1.191576 | 2.100854  | 4.257414  |
| H | -2.162943 | 2.212422  | 3.758595  |
| H | -1.102809 | 2.920823  | 4.977924  |
| H | -2.234428 | -3.590025 | 3.595885  |
| O | -1.238339 | -3.409603 | 1.100830  |
| C | -1.561263 | -4.743793 | 1.436879  |
| H | -1.087463 | -5.030629 | 2.385122  |
| H | -2.647268 | -4.867753 | 1.533507  |
| C | -1.038486 | -5.632980 | 0.333648  |
| H | -1.424037 | -6.654624 | 0.477007  |
| H | -1.390671 | -5.263720 | -0.638864 |
| O | 0.374870  | -5.624174 | 0.386828  |
| C | 0.966228  | -6.259752 | -0.725012 |
| H | 0.649901  | -5.794066 | -1.669901 |
| H | 2.049025  | -6.151823 | -0.619784 |
| H | 0.713858  | -7.330459 | -0.758024 |

# B5fS

| Coordinates (Angstroms) |           |           |           |
|-------------------------|-----------|-----------|-----------|
|                         | X         | Y         | Z         |
| Ir                      | 0.117551  | 0.212892  | -0.056314 |
| C                       | -0.845529 | -0.409185 | -1.721911 |
| N                       | 0.562548  | -1.816253 | -0.097204 |
| C                       | -1.598619 | 0.344009  | -2.653048 |
| C                       | -2.230626 | -0.269591 | -3.730754 |
| C                       | -2.131808 | -1.653444 | -3.939579 |
| C                       | -1.404954 | -2.440719 | -3.068721 |
| C                       | -0.774863 | -1.797637 | -1.980543 |
| C                       | 0.166247  | -4.032290 | -1.165547 |
| C                       | 0.025010  | -2.542192 | -1.035744 |
| C                       | 1.390955  | -2.370740 | 0.918211  |
| C                       | 1.061107  | -2.153020 | 2.253783  |
| C                       | 1.890037  | -2.606470 | 3.278474  |
| C                       | 3.056321  | -3.296206 | 2.927184  |
| C                       | 3.410667  | -3.521042 | 1.592322  |
| C                       | 2.569614  | -3.038786 | 0.590874  |
| O                       | 3.926941  | -3.726967 | 3.909354  |
| C                       | 3.560260  | -4.965992 | 4.503916  |
| H                       | -2.642846 | -2.100792 | -4.789010 |
| H                       | 0.294404  | -4.491110 | -0.179914 |
| H                       | 0.161994  | -1.592693 | 2.493942  |

|   |           |           |           |
|---|-----------|-----------|-----------|
| H | 2.847134  | -3.160391 | -0.452218 |
| H | 4.345004  | -5.212885 | 5.222519  |
| H | 2.599935  | -4.890693 | 5.028969  |
| H | 3.492364  | -5.761045 | 3.750689  |
| C | 0.609105  | 2.342149  | -0.477864 |
| C | -0.008700 | 2.238690  | 0.805409  |
| C | 0.899491  | 1.521233  | 1.662918  |
| C | 2.042327  | 1.169102  | 0.897315  |
| C | 1.881356  | 1.684450  | -0.436003 |
| C | 2.877350  | 1.675904  | -1.566879 |
| C | 3.246925  | 0.428344  | 1.421286  |
| C | 3.589157  | 0.353754  | -1.759006 |
| C | 4.515459  | 1.200523  | 1.141416  |
| C | 4.945133  | 2.195299  | 2.073176  |
| C | 6.080737  | 2.931801  | 1.850709  |
| C | 6.831077  | 2.738337  | 0.659456  |
| C | 6.398630  | 1.784520  | -0.301205 |
| C | 5.223681  | 1.010274  | -0.023497 |
| C | 3.087875  | -0.579790 | -2.721668 |
| C | 3.722197  | -1.776661 | -2.945656 |
| C | 4.894184  | -2.111584 | -2.216562 |
| C | 5.396186  | -1.212389 | -1.238163 |
| C | 4.716335  | 0.033456  | -1.034379 |
| C | 5.586017  | -3.328717 | -2.455768 |
| C | 6.730329  | -3.636114 | -1.761077 |
| C | 7.222494  | -2.749158 | -0.777170 |
| C | 6.564040  | -1.572300 | -0.515163 |
| H | 0.197047  | 2.835719  | -1.347560 |
| H | -0.950250 | 2.682580  | 1.098586  |
| H | 0.754446  | 1.297674  | 2.711953  |
| H | 2.346820  | 1.942737  | -2.484287 |
| H | 3.625503  | 2.459469  | -1.393683 |
| H | 3.126601  | 0.266330  | 2.494762  |
| H | 3.315765  | -0.555613 | 0.952655  |
| H | 3.359075  | -2.479139 | -3.688134 |
| H | 5.197953  | -4.012075 | -3.207617 |
| H | 7.255185  | -4.566739 | -1.959459 |
| H | 8.120074  | -3.004225 | -0.220702 |
| H | 6.943478  | -0.901893 | 0.249815  |
| O | 4.135369  | 2.333016  | 3.154805  |
| C | 4.431603  | 3.353280  | 4.091928  |
| H | 4.427745  | 4.340534  | 3.615085  |
| H | 3.639496  | 3.309281  | 4.841296  |
| H | 5.400156  | 3.183082  | 4.577590  |

|    |            |           |           |
|----|------------|-----------|-----------|
| O  | 1.983144   | -0.170068 | -3.389811 |
| C  | 1.494600   | -0.980416 | -4.442603 |
| H  | 1.192362   | -1.969117 | -4.080708 |
| H  | 0.621009   | -0.459892 | -4.836739 |
| H  | 2.246836   | -1.088375 | -5.234143 |
| H  | 1.083590   | -4.243434 | -1.733058 |
| H  | 6.420537   | 3.678882  | 2.560019  |
| C  | 8.001037   | 3.499644  | 0.396838  |
| C  | 8.701926   | 3.333379  | -0.771997 |
| C  | 7.134924   | 1.647711  | -1.507641 |
| C  | 8.259890   | 2.401230  | -1.737787 |
| H  | 9.595472   | 3.922444  | -0.960339 |
| H  | 8.330737   | 4.223266  | 1.138650  |
| H  | 8.810198   | 2.283526  | -2.667122 |
| H  | 6.799672   | 0.938642  | -2.258173 |
| H  | -1.220809  | -0.308020 | 0.614438  |
| C  | -6.184048  | -1.653303 | -1.065748 |
| C  | -7.454871  | -2.215655 | -1.098244 |
| C  | -8.442753  | -1.660972 | -0.298432 |
| C  | -8.186543  | -0.568286 | 0.516409  |
| C  | -6.903114  | -0.037136 | 0.517478  |
| C  | -5.858028  | -0.550427 | -0.263644 |
| H  | -7.665445  | -3.066170 | -1.736217 |
| H  | -8.963196  | -0.135864 | 1.136514  |
| Cl | -6.622637  | 1.345351  | 1.548030  |
| Cl | -10.044681 | -2.351256 | -0.322193 |
| Cl | -4.977381  | -2.376822 | -2.100107 |
| C  | -4.474596  | 0.062710  | -0.227083 |
| H  | -4.530247  | 1.155238  | -0.245470 |
| H  | -3.904050  | -0.227952 | -1.115582 |
| N  | -3.291939  | 0.471835  | 1.801828  |
| C  | -3.678224  | -0.415838 | 0.955185  |
| C  | -3.344642  | -1.853608 | 1.100279  |
| H  | -4.271256  | -2.425234 | 1.230273  |
| H  | -2.871399  | -2.190731 | 0.171650  |
| H  | -2.676767  | -2.041537 | 1.938394  |
| O  | -2.414797  | 0.148507  | 2.789788  |
| C  | -2.954565  | 0.284997  | 4.157830  |
| C  | -4.125732  | -0.670572 | 4.336260  |
| H  | -4.498948  | -0.597574 | 5.362999  |
| H  | -4.955791  | -0.420724 | 3.666295  |
| H  | -3.821860  | -1.706321 | 4.153370  |
| C  | -1.750479  | -0.131243 | 4.989500  |
| H  | -0.903666  | 0.535836  | 4.798263  |

|   |           |           |           |
|---|-----------|-----------|-----------|
| H | -2.001022 | -0.076843 | 6.053317  |
| H | -1.455905 | -1.159818 | 4.757148  |
| C | -3.342639 | 1.733738  | 4.416281  |
| H | -3.562496 | 1.863937  | 5.480889  |
| H | -2.522372 | 2.405829  | 4.144631  |
| H | -4.235237 | 2.025062  | 3.854388  |
| H | -3.436089 | 1.504381  | 1.657130  |
| S | -3.549508 | 3.994503  | 0.329907  |
| C | -4.731614 | 5.286138  | 0.658605  |
| H | -4.424528 | 5.829706  | 1.555311  |
| H | -4.756556 | 5.964044  | -0.198313 |
| H | -5.716615 | 4.838152  | 0.808607  |
| O | -4.047617 | 3.260134  | -0.853860 |
| O | -3.556105 | 3.148746  | 1.566490  |
| O | -2.246945 | 4.660674  | 0.125918  |
| C | 4.688994  | -4.240912 | 1.263518  |
| H | 5.557294  | -3.709618 | 1.667406  |
| H | 4.701000  | -5.249272 | 1.693921  |
| H | 4.816272  | -4.332602 | 0.181774  |
| C | 1.546486  | -2.327437 | 4.717842  |
| H | 0.851926  | -3.076729 | 5.117807  |
| H | 2.440684  | -2.332355 | 5.347803  |
| H | 1.065992  | -1.348767 | 4.814230  |
| C | -1.251702 | -3.932781 | -3.247101 |
| H | -0.392553 | -4.141409 | -3.902780 |
| H | -2.133747 | -4.342169 | -3.752381 |
| C | -1.031703 | -4.633087 | -1.906171 |
| H | -1.933392 | -4.533851 | -1.288101 |
| H | -0.861356 | -5.703681 | -2.060151 |
| H | -2.829264 | 0.315987  | -4.421256 |
| O | -1.690292 | 1.689027  | -2.425129 |
| C | -2.089424 | 2.529313  | -3.493958 |
| H | -1.618355 | 2.200045  | -4.429786 |
| H | -3.179620 | 2.507031  | -3.621708 |
| C | -1.646345 | 3.935522  | -3.175258 |
| H | -2.065149 | 4.622841  | -3.927604 |
| H | -2.019243 | 4.230612  | -2.187893 |
| O | -0.231318 | 3.979243  | -3.200744 |
| C | 0.278511  | 5.182183  | -2.667227 |
| H | -0.067398 | 5.340960  | -1.636226 |
| H | 1.369053  | 5.101615  | -2.671254 |
| H | -0.019043 | 6.050060  | -3.275728 |

-----

**B5uR**

| -----                   |           |           |           |
|-------------------------|-----------|-----------|-----------|
| Coordinates (Angstroms) |           |           |           |
|                         | X         | Y         | Z         |
| -----                   |           |           |           |
| Ir                      | -0.136247 | -1.301353 | -0.259717 |
| C                       | 0.825275  | -1.231330 | -2.020190 |
| N                       | 0.079600  | 0.738532  | -0.562527 |
| C                       | 1.343896  | -2.305430 | -2.766905 |
| C                       | 2.021832  | -2.090212 | -3.962035 |
| C                       | 2.242905  | -0.789777 | -4.440075 |
| C                       | 1.789068  | 0.305902  | -3.725431 |
| C                       | 1.082988  | 0.059007  | -2.531079 |
| C                       | 0.923625  | 2.563534  | -2.039989 |
| C                       | 0.645824  | 1.134988  | -1.668367 |
| C                       | -0.350686 | 1.654992  | 0.437070  |
| C                       | 0.155300  | 1.518300  | 1.727499  |
| C                       | -0.265648 | 2.356096  | 2.756945  |
| C                       | -1.224164 | 3.332408  | 2.459290  |
| C                       | -1.756497 | 3.479853  | 1.173728  |
| C                       | -1.311856 | 2.624722  | 0.165018  |
| O                       | -1.713361 | 4.143272  | 3.463963  |
| C                       | -0.915857 | 5.292485  | 3.726940  |
| H                       | 2.790111  | -0.648257 | -5.368935 |
| H                       | 1.056968  | 3.174802  | -1.142085 |
| H                       | 0.871822  | 0.729409  | 1.934453  |
| H                       | -1.735594 | 2.698171  | -0.832668 |
| H                       | -1.460836 | 5.890729  | 4.460431  |
| H                       | 0.061517  | 5.017147  | 4.141140  |
| H                       | -0.762865 | 5.884145  | 2.816212  |
| C                       | -1.377312 | -3.129036 | -0.480195 |
| C                       | -0.632277 | -3.195393 | 0.735946  |
| C                       | -1.145241 | -2.170087 | 1.611351  |
| C                       | -2.153271 | -1.459727 | 0.909757  |
| C                       | -2.331427 | -2.066472 | -0.386237 |
| C                       | -3.404239 | -1.777093 | -1.400916 |
| C                       | -2.938350 | -0.295775 | 1.458350  |
| C                       | -3.652587 | -0.307762 | -1.655353 |
| C                       | -4.423356 | -0.566665 | 1.408877  |
| C                       | -5.046219 | -1.225084 | 2.504912  |
| C                       | -6.382071 | -1.517138 | 2.502082  |
| C                       | -7.178448 | -1.194269 | 1.374365  |
| C                       | -6.573628 | -0.562604 | 0.251134  |
| C                       | -5.178245 | -0.241100 | 0.298044  |

|   |            |           |           |
|---|------------|-----------|-----------|
| C | -2.988440  | 0.330259  | -2.750896 |
| C | -3.237970  | 1.643941  | -3.060062 |
| C | -4.146910  | 2.401855  | -2.274262 |
| C | -4.778897  | 1.803785  | -1.150935 |
| C | -4.517774  | 0.421346  | -0.869212 |
| C | -4.440223  | 3.753953  | -2.593844 |
| C | -5.324097  | 4.481133  | -1.834969 |
| C | -5.937416  | 3.894395  | -0.705245 |
| C | -5.663016  | 2.591550  | -0.367214 |
| H | -1.259951  | -3.788549 | -1.329533 |
| H | 0.126080   | -3.926535 | 0.975263  |
| H | -0.828056  | -1.968322 | 2.626552  |
| H | -3.129775  | -2.267497 | -2.337695 |
| H | -4.339853  | -2.239354 | -1.062609 |
| H | -2.615090  | -0.108715 | 2.484396  |
| H | -2.718089  | 0.605691  | 0.883368  |
| H | -2.766202  | 2.125546  | -3.909815 |
| H | -3.957509  | 4.202541  | -3.458951 |
| H | -5.545733  | 5.512797  | -2.094240 |
| H | -6.620075  | 4.480799  | -0.096813 |
| H | -6.131055  | 2.154282  | 0.509097  |
| O | -4.256110  | -1.600808 | 3.570930  |
| C | -4.297574  | -0.698197 | 4.671350  |
| H | -5.303726  | -0.649615 | 5.105915  |
| H | -3.596979  | -1.082166 | 5.416211  |
| H | -3.989773  | 0.311542  | 4.369603  |
| O | -2.141077  | -0.468800 | -3.445111 |
| C | -1.537129  | 0.048895  | -4.617072 |
| H | -0.929261  | 0.933479  | -4.398715 |
| H | -0.892460  | -0.745521 | -4.995597 |
| H | -2.295521  | 0.300387  | -5.368478 |
| H | 0.041163   | 2.959640  | -2.561996 |
| H | -6.828720  | -2.015762 | 3.358169  |
| C | -8.564131  | -1.506207 | 1.335644  |
| C | -9.317868  | -1.214522 | 0.227594  |
| C | -7.380441  | -0.288484 | -0.887417 |
| C | -8.715957  | -0.604133 | -0.897762 |
| H | -10.377123 | -1.455567 | 0.207895  |
| H | -9.015787  | -1.983695 | 2.201847  |
| H | -9.315653  | -0.386754 | -1.777291 |
| H | -6.929361  | 0.172012  | -1.760758 |
| C | -2.808409  | 4.520167  | 0.906377  |
| H | -3.704803  | 4.338416  | 1.509157  |
| H | -2.451009  | 5.525978  | 1.155894  |

|    |           |           |           |
|----|-----------|-----------|-----------|
| H  | -3.096997 | 4.515264  | -0.147754 |
| C  | 0.284574  | 2.197652  | 4.148867  |
| H  | 1.092596  | 2.913991  | 4.343725  |
| H  | -0.489876 | 2.365768  | 4.903959  |
| H  | 0.695205  | 1.192684  | 4.291279  |
| C  | 2.024631  | 1.731083  | -4.161609 |
| C  | 2.146948  | 2.665679  | -2.956961 |
| H  | 2.923619  | 1.789776  | -4.784633 |
| H  | 1.185532  | 2.066264  | -4.790068 |
| H  | 3.049382  | 2.410543  | -2.386250 |
| H  | 2.260771  | 3.702119  | -3.291076 |
| H  | 2.399475  | -2.936140 | -4.530823 |
| O  | 1.151721  | -3.564261 | -2.254989 |
| C  | 2.192708  | -4.516883 | -2.398432 |
| H  | 3.165697  | -4.010972 | -2.442388 |
| H  | 2.063274  | -5.104609 | -3.316633 |
| C  | 2.147019  | -5.436298 | -1.199746 |
| H  | 2.898741  | -6.230851 | -1.330333 |
| H  | 1.158251  | -5.914578 | -1.124503 |
| O  | 2.412897  | -4.677855 | -0.040016 |
| C  | 2.384436  | -5.448361 | 1.139875  |
| H  | 2.511825  | -4.757662 | 1.976196  |
| H  | 1.425407  | -5.975312 | 1.255357  |
| H  | 3.193863  | -6.193914 | 1.154503  |
| H  | 1.374190  | -1.261807 | 0.259403  |
| C  | 5.307885  | 2.098791  | 0.984278  |
| C  | 6.503061  | 2.803468  | 0.935725  |
| C  | 7.271898  | 2.711994  | -0.215383 |
| C  | 6.866583  | 1.945701  | -1.297750 |
| C  | 5.666249  | 1.251317  | -1.205959 |
| C  | 4.845853  | 1.296823  | -0.068736 |
| H  | 6.819622  | 3.411659  | 1.774974  |
| H  | 7.467440  | 1.888344  | -2.197930 |
| Cl | 5.194935  | 0.313434  | -2.600680 |
| Cl | 8.776481  | 3.586168  | -0.306446 |
| Cl | 4.356038  | 2.282795  | 2.441893  |
| C  | 3.531535  | 0.546743  | 0.019874  |
| H  | 3.122076  | 0.384095  | -0.979968 |
| H  | 2.794833  | 1.131457  | 0.575460  |
| N  | 3.396113  | -0.948392 | 1.888056  |
| C  | 3.710758  | -0.811856 | 0.645304  |
| C  | 4.247734  | -1.943067 | -0.141352 |
| H  | 3.691766  | -1.995315 | -1.083206 |
| H  | 5.297362  | -1.734100 | -0.382365 |

|   |          |           |          |
|---|----------|-----------|----------|
| H | 4.171338 | -2.890439 | 0.387201 |
| O | 3.436603 | -2.149922 | 2.511194 |
| C | 4.427014 | -2.204339 | 3.620052 |
| C | 5.811655 | -1.898073 | 3.069711 |
| H | 6.085304 | -2.608304 | 2.283136 |
| H | 5.878769 | -0.879561 | 2.671167 |
| H | 6.545165 | -1.981184 | 3.878039 |
| C | 4.301580 | -3.650596 | 4.069907 |
| H | 4.997289 | -3.831956 | 4.894887 |
| H | 3.286542 | -3.863984 | 4.420135 |
| H | 4.550123 | -4.335191 | 3.252604 |
| C | 4.001169 | -1.235252 | 4.714478 |
| H | 4.137192 | -0.189206 | 4.419360 |
| H | 2.952974 | -1.397487 | 4.986599 |
| H | 4.616682 | -1.401643 | 5.603824 |
| H | 2.958510 | -0.199086 | 2.424881 |

# B5uS

| Coordinates (Angstroms) |           |           |           |
|-------------------------|-----------|-----------|-----------|
|                         | X         | Y         | Z         |
| Ir                      | 0.277797  | 0.218315  | -0.335593 |
| C                       | 1.277298  | 0.182100  | 1.442077  |
| N                       | -0.057053 | -1.720233 | 0.329640  |
| C                       | 1.975765  | 1.189094  | 2.134906  |
| C                       | 2.723188  | 0.920109  | 3.278597  |
| C                       | 2.756083  | -0.356767 | 3.838534  |
| C                       | 2.040988  | -1.385022 | 3.245786  |
| C                       | 1.325986  | -1.092938 | 2.068875  |
| C                       | 0.472329  | -3.506478 | 1.975617  |
| C                       | 0.544656  | -2.117304 | 1.410571  |
| C                       | -0.939496 | -2.570846 | -0.395035 |
| C                       | -0.687025 | -2.837416 | -1.737128 |
| C                       | -1.587766 | -3.581350 | -2.497549 |
| C                       | -2.748239 | -4.052609 | -1.871232 |
| C                       | -3.018302 | -3.800707 | -0.521698 |
| C                       | -2.101651 | -3.046571 | 0.208635  |
| O                       | -3.695844 | -4.737258 | -2.605621 |
| C                       | -3.433019 | -6.128630 | -2.746074 |
| H                       | 3.343806  | -0.538826 | 4.734591  |
| H                       | 0.305989  | -4.235287 | 1.176577  |
| H                       | 0.211151  | -2.437431 | -2.199105 |

|   |           |           |           |
|---|-----------|-----------|-----------|
| H | -2.310720 | -2.795137 | 1.245155  |
| H | -4.286377 | -6.555211 | -3.278021 |
| H | -2.518921 | -6.309011 | -3.324815 |
| H | -3.335447 | -6.614427 | -1.767172 |
| C | -0.283992 | 2.345603  | -0.654642 |
| C | 0.207878  | 1.803940  | -1.878638 |
| C | -0.719588 | 0.802355  | -2.319763 |
| C | -1.770127 | 0.731376  | -1.361976 |
| C | -1.527843 | 1.699139  | -0.330430 |
| C | -2.454125 | 2.100786  | 0.787380  |
| C | -2.969584 | -0.170441 | -1.485246 |
| C | -3.128693 | 0.940889  | 1.485154  |
| C | -4.244939 | 0.635331  | -1.460665 |
| C | -4.765141 | 1.162763  | -2.674016 |
| C | -5.899390 | 1.927009  | -2.693562 |
| C | -6.572783 | 2.233643  | -1.483483 |
| C | -6.057218 | 1.737338  | -0.252475 |
| C | -4.879472 | 0.924427  | -0.269066 |
| C | -2.536464 | 0.396466  | 2.668855  |
| C | -3.110618 | -0.665741 | 3.322047  |
| C | -4.318118 | -1.235917 | 2.837251  |
| C | -4.923315 | -0.712228 | 1.663702  |
| C | -4.296199 | 0.393641  | 1.000616  |
| C | -4.942862 | -2.318592 | 3.511795  |
| C | -6.120392 | -2.851596 | 3.047262  |
| C | -6.718290 | -2.337495 | 1.874648  |
| C | -6.128003 | -1.299948 | 1.195277  |
| H | 0.179935  | 3.154940  | -0.108092 |
| H | 1.095178  | 2.131413  | -2.401811 |
| H | -0.664536 | 0.222230  | -3.231911 |
| H | -1.882781 | 2.681205  | 1.513728  |
| H | -3.222855 | 2.771726  | 0.383717  |
| H | -2.886004 | -0.735350 | -2.415537 |
| H | -2.983097 | -0.895301 | -0.670675 |
| H | -2.671218 | -1.079154 | 4.223114  |
| H | -4.475074 | -2.714588 | 4.410271  |
| H | -6.591828 | -3.675315 | 3.576363  |
| H | -7.642540 | -2.772160 | 1.504615  |
| H | -6.588926 | -0.920265 | 0.288855  |
| O | -4.069980 | 0.916097  | -3.838938 |
| C | -4.578306 | -0.175709 | -4.599022 |
| H | -5.595665 | 0.030412  | -4.953748 |
| H | -3.910780 | -0.296492 | -5.454853 |
| H | -4.585354 | -1.102372 | -4.009940 |

|   |           |           |           |
|---|-----------|-----------|-----------|
| O | -1.406487 | 1.022884  | 3.079813  |
| C | -0.820466 | 0.618373  | 4.304342  |
| H | -0.479635 | -0.421882 | 4.261221  |
| H | 0.038462  | 1.273597  | 4.452423  |
| H | -1.525145 | 0.743205  | 5.135868  |
| H | -0.398146 | -3.561639 | 2.644468  |
| H | -6.274644 | 2.316053  | -3.636460 |
| C | -7.743348 | 3.038892  | -1.472453 |
| C | -8.373166 | 3.344731  | -0.293017 |
| C | -6.727022 | 2.083273  | 0.953061  |
| C | -7.855592 | 2.863747  | 0.932782  |
| H | -9.269103 | 3.959472  | -0.295434 |
| H | -8.130657 | 3.410478  | -2.418067 |
| H | -8.356025 | 3.116038  | 1.863550  |
| H | -6.335647 | 1.724636  | 1.900169  |
| C | -4.294154 | -4.297043 | 0.099633  |
| H | -5.169130 | -3.888184 | -0.416947 |
| H | -4.369588 | -5.389333 | 0.043324  |
| H | -4.351905 | -4.007149 | 1.152326  |
| C | -1.329372 | -3.844674 | -3.956977 |
| H | -0.815252 | -4.802509 | -4.104332 |
| H | -2.265339 | -3.883829 | -4.522535 |
| H | -0.695184 | -3.062069 | -4.385418 |
| C | 1.998372  | -2.774041 | 3.837149  |
| C | 1.738036  | -3.835572 | 2.770830  |
| H | 2.935523  | -2.980780 | 4.365995  |
| H | 1.198582  | -2.818998 | 4.591413  |
| H | 2.595658  | -3.890751 | 2.089077  |
| H | 1.627617  | -4.820642 | 3.235453  |
| H | 3.305889  | 1.712384  | 3.740565  |
| O | 2.005284  | 2.468978  | 1.597542  |
| C | 1.921610  | 3.583652  | 2.491143  |
| H | 2.844506  | 4.165212  | 2.402736  |
| H | 1.823169  | 3.243111  | 3.525197  |
| C | 0.713550  | 4.425802  | 2.162617  |
| H | 0.640966  | 5.239815  | 2.900760  |
| H | -0.194336 | 3.809525  | 2.245830  |
| O | 0.841678  | 4.948755  | 0.858971  |
| C | -0.276503 | 5.718022  | 0.468999  |
| H | -0.100777 | 6.048755  | -0.557291 |
| H | -1.202309 | 5.124760  | 0.500038  |
| H | -0.399407 | 6.597691  | 1.116835  |
| H | 1.652644  | -0.391047 | -0.886181 |
| C | 5.445784  | -2.134622 | -0.458988 |

|    |          |           |           |
|----|----------|-----------|-----------|
| C  | 6.536014 | -2.969038 | -0.676102 |
| C  | 7.809929 | -2.431850 | -0.561563 |
| C  | 8.012329 | -1.096034 | -0.243318 |
| C  | 6.894890 | -0.300409 | -0.031995 |
| C  | 5.582762 | -0.781684 | -0.123805 |
| H  | 6.389883 | -4.012879 | -0.928098 |
| H  | 9.011426 | -0.684566 | -0.159299 |
| Cl | 7.166782 | 1.382028  | 0.361838  |
| Cl | 9.193110 | -3.459663 | -0.826182 |
| Cl | 3.858352 | -2.849534 | -0.626190 |
| C  | 4.401933 | 0.113943  | 0.143183  |
| H  | 4.546748 | 0.672606  | 1.071982  |
| H  | 3.497908 | -0.487586 | 0.289346  |
| N  | 3.553437 | 2.183586  | -0.665074 |
| C  | 4.078090 | 1.052730  | -0.985889 |
| C  | 4.279015 | 0.652290  | -2.395581 |
| H  | 5.347274 | 0.496971  | -2.584942 |
| H  | 3.779381 | -0.311938 | -2.547207 |
| H  | 3.879474 | 1.384432  | -3.094593 |
| O  | 3.065282 | 3.044804  | -1.593203 |
| C  | 3.835308 | 4.307841  | -1.708341 |
| C  | 4.045398 | 4.923766  | -0.332454 |
| H  | 3.088082 | 5.065036  | 0.177422  |
| H  | 4.709747 | 4.314347  | 0.291318  |
| H  | 4.520355 | 5.902557  | -0.453420 |
| C  | 2.896457 | 5.145098  | -2.561608 |
| H  | 3.346925 | 6.124210  | -2.750048 |
| H  | 2.709079 | 4.659700  | -3.525314 |
| H  | 1.941588 | 5.290274  | -2.045815 |
| C  | 5.151705 | 4.015835  | -2.413607 |
| H  | 5.784884 | 3.346137  | -1.821257 |
| H  | 4.981989 | 3.566744  | -3.397118 |
| H  | 5.702162 | 4.952203  | -2.552766 |
| H  | 3.245045 | 2.405916  | 0.299587  |

## B6

| Coordinates (Angstroms) |          |           |           |
|-------------------------|----------|-----------|-----------|
|                         | X        | Y         | Z         |
| Ir                      | 1.791470 | -0.263518 | 0.874063  |
| C                       | 3.229011 | 0.352886  | -0.437862 |
| N                       | 1.264113 | 1.740690  | 0.588985  |

|   |           |           |           |
|---|-----------|-----------|-----------|
| C | 4.285981  | -0.374440 | -0.991212 |
| C | 5.249777  | 0.259706  | -1.789836 |
| C | 5.172947  | 1.623256  | -2.047231 |
| C | 4.133552  | 2.392768  | -1.523919 |
| C | 3.186240  | 1.731329  | -0.735094 |
| C | 1.894205  | 3.918414  | -0.419296 |
| C | 2.060309  | 2.456707  | -0.147574 |
| C | 0.082911  | 2.268615  | 1.186684  |
| C | -0.073929 | 2.169077  | 2.565298  |
| C | -1.259704 | 2.571284  | 3.177181  |
| C | -2.279102 | 3.083467  | 2.364667  |
| C | -2.138150 | 3.196139  | 0.976658  |
| C | -0.945592 | 2.770204  | 0.393337  |
| O | -3.488060 | 3.434574  | 2.928129  |
| C | -3.529872 | 4.758425  | 3.451085  |
| H | 5.935711  | 2.092265  | -2.663600 |
| H | 1.356003  | 4.400658  | 0.401682  |
| H | 0.728419  | 1.749887  | 3.167364  |
| H | -0.828370 | 2.801625  | -0.686380 |
| H | -4.540400 | 4.908289  | 3.837388  |
| H | -2.808851 | 4.890382  | 4.267043  |
| H | -3.324611 | 5.499978  | 2.669448  |
| C | 1.707732  | -2.403775 | 0.524266  |
| C | 1.830030  | -2.201256 | 1.913069  |
| C | 0.624588  | -1.546757 | 2.391004  |
| C | -0.203071 | -1.277174 | 1.295545  |
| C | 0.494587  | -1.740701 | 0.090568  |
| C | -0.065260 | -1.864138 | -1.298357 |
| C | -1.561399 | -0.637911 | 1.324264  |
| C | -0.859840 | -0.679697 | -1.798423 |
| C | -2.574679 | -1.576179 | 0.712767  |
| C | -3.168250 | -2.570301 | 1.536833  |
| C | -4.060906 | -3.475452 | 1.033303  |
| C | -4.388895 | -3.458637 | -0.345711 |
| C | -3.783497 | -2.492079 | -1.198386 |
| C | -2.872694 | -1.539994 | -0.635498 |
| C | -0.206503 | 0.283583  | -2.630685 |
| C | -0.900653 | 1.334776  | -3.174138 |
| C | -2.285031 | 1.491301  | -2.901536 |
| C | -2.945611 | 0.571760  | -2.042713 |
| C | -2.199680 | -0.532084 | -1.511643 |
| C | -3.028602 | 2.551597  | -3.484256 |
| C | -4.368980 | 2.695199  | -3.225064 |
| C | -5.021983 | 1.797093  | -2.350825 |

|   |           |           |           |
|---|-----------|-----------|-----------|
| C | -4.325331 | 0.766919  | -1.767661 |
| H | 2.416812  | -2.894528 | -0.123884 |
| H | 2.662640  | -2.514497 | 2.529540  |
| H | 0.420180  | -1.272097 | 3.417992  |
| H | 0.764366  | -2.064189 | -1.979628 |
| H | -0.701597 | -2.757932 | -1.301272 |
| H | -1.819040 | -0.405057 | 2.358735  |
| H | -1.546089 | 0.301421  | 0.768931  |
| H | -0.419628 | 2.050879  | -3.831563 |
| H | -2.516394 | 3.244442  | -4.147639 |
| H | -4.928730 | 3.505236  | -3.684240 |
| H | -6.078790 | 1.927130  | -2.136176 |
| H | -4.834877 | 0.087643  | -1.091404 |
| O | -2.780732 | -2.623503 | 2.857248  |
| C | -3.729921 | -2.080713 | 3.770498  |
| H | -4.673685 | -2.638474 | 3.740247  |
| H | -3.288420 | -2.170086 | 4.765377  |
| H | -3.928659 | -1.023823 | 3.551074  |
| O | 1.110313  | 0.048554  | -2.846914 |
| C | 1.813778  | 0.908535  | -3.725350 |
| H | 1.807696  | 1.942970  | -3.363885 |
| H | 2.839516  | 0.537852  | -3.745604 |
| H | 1.389283  | 0.868978  | -4.735869 |
| H | 1.264388  | 4.018076  | -1.315513 |
| H | -4.499310 | -4.225022 | 1.686636  |
| C | -5.292669 | -4.405894 | -0.897698 |
| C | -5.576757 | -4.404791 | -2.239107 |
| C | -4.089521 | -2.527874 | -2.587009 |
| C | -4.963258 | -3.457595 | -3.092318 |
| H | -6.268915 | -5.133668 | -2.651405 |
| H | -5.751134 | -5.136020 | -0.235344 |
| H | -5.183344 | -3.470040 | -4.156101 |
| H | -3.621228 | -1.812111 | -3.255311 |
| C | -3.265609 | 3.736634  | 0.142747  |
| H | -4.192936 | 3.183349  | 0.321594  |
| H | -3.466614 | 4.787959  | 0.381621  |
| H | -3.025657 | 3.673929  | -0.921635 |
| C | -1.447720 | 2.427666  | 4.663564  |
| H | -1.178568 | 3.350631  | 5.191585  |
| H | -2.489713 | 2.200619  | 4.908449  |
| H | -0.814774 | 1.626789  | 5.058468  |
| C | 4.011006  | 3.872857  | -1.790917 |
| C | 3.250949  | 4.582636  | -0.671891 |
| H | 5.006532  | 4.312494  | -1.914858 |

|   |          |           |           |
|---|----------|-----------|-----------|
| H | 3.482331 | 4.025676  | -2.743514 |
| H | 3.844126 | 4.558531  | 0.250921  |
| H | 3.091019 | 5.634417  | -0.927547 |
| H | 6.068102 | -0.312047 | -2.216366 |
| O | 4.327396 | -1.708922 | -0.732026 |
| C | 5.566755 | -2.396895 | -0.777898 |
| H | 6.335693 | -1.826311 | -0.241014 |
| H | 5.897931 | -2.554138 | -1.812019 |
| C | 5.343212 | -3.736587 | -0.118329 |
| H | 6.271744 | -4.324957 | -0.177386 |
| H | 4.555744 | -4.289114 | -0.654314 |
| O | 4.967962 | -3.521429 | 1.225547  |
| C | 4.646466 | -4.721464 | 1.894307  |
| H | 4.418195 | -4.467351 | 2.932552  |
| H | 3.770453 | -5.211593 | 1.443865  |
| H | 5.488206 | -5.429874 | 1.880094  |

# B7fR

| Coordinates (Angstroms) |           |           |           |
|-------------------------|-----------|-----------|-----------|
|                         | X         | Y         | Z         |
| Ir                      | -0.139049 | 1.009724  | 0.397480  |
| C                       | 0.296009  | 1.428748  | 2.326578  |
| N                       | -0.063331 | -0.883270 | 1.259919  |
| C                       | 0.499959  | 2.690474  | 2.929089  |
| C                       | 0.839128  | 2.798304  | 4.273631  |
| C                       | 1.008063  | 1.653478  | 5.068944  |
| C                       | 0.829146  | 0.393603  | 4.532661  |
| C                       | 0.463884  | 0.310108  | 3.169990  |
| C                       | 0.399349  | -2.234953 | 3.313781  |
| C                       | 0.243021  | -0.964740 | 2.525904  |
| C                       | -0.307818 | -2.029279 | 0.453924  |
| C                       | 0.340577  | -2.123164 | -0.775632 |
| C                       | 0.104245  | -3.187215 | -1.638987 |
| C                       | -0.816426 | -4.163976 | -1.241117 |
| C                       | -1.496959 | -4.084644 | -0.022161 |
| C                       | -1.239038 | -2.999633 | 0.817272  |
| O                       | -1.116323 | -5.204485 | -2.098818 |
| C                       | -0.246874 | -6.324755 | -1.981471 |
| H                       | 1.289087  | 1.770326  | 6.113030  |
| H                       | 0.689148  | -3.065255 | 2.663502  |
| H                       | 1.005373  | -1.320885 | -1.076358 |

|   |           |           |           |
|---|-----------|-----------|-----------|
| H | -1.793621 | -2.898217 | 1.745025  |
| H | -0.599922 | -7.069331 | -2.698628 |
| H | 0.790025  | -6.057976 | -2.220002 |
| H | -0.280472 | -6.750523 | -0.971112 |
| C | -1.270638 | 2.796782  | -0.317855 |
| C | -0.249101 | 2.466438  | -1.258980 |
| C | -0.592752 | 1.195499  | -1.841591 |
| C | -1.794169 | 0.745555  | -1.230177 |
| C | -2.244464 | 1.745877  | -0.299366 |
| C | -3.547218 | 1.780766  | 0.456823  |
| C | -2.485609 | -0.554493 | -1.553641 |
| C | -3.885127 | 0.474767  | 1.139807  |
| C | -3.932587 | -0.346985 | -1.925055 |
| C | -4.283150 | -0.108696 | -3.282288 |
| C | -5.580768 | 0.100435  | -3.660218 |
| C | -6.613175 | 0.107680  | -2.687595 |
| C | -6.284608 | -0.106403 | -1.318819 |
| C | -4.918860 | -0.341049 | -0.959096 |
| C | -3.504530 | 0.286692  | 2.506934  |
| C | -3.764024 | -0.893028 | 3.157986  |
| C | -4.432593 | -1.948607 | 2.482517  |
| C | -4.821843 | -1.784685 | 1.125993  |
| C | -4.535987 | -0.539807 | 0.472983  |
| C | -4.731808 | -3.169201 | 3.143707  |
| C | -5.396646 | -4.178809 | 2.491876  |
| C | -5.773108 | -4.021954 | 1.138870  |
| C | -5.482485 | -2.857275 | 0.470819  |
| H | -1.315883 | 3.706543  | 0.267119  |
| H | 0.579103  | 3.106389  | -1.533058 |
| H | -0.044413 | 0.658243  | -2.603471 |
| H | -3.491891 | 2.580626  | 1.198221  |
| H | -4.355359 | 2.045023  | -0.236049 |
| H | -1.945891 | -1.039391 | -2.368823 |
| H | -2.437646 | -1.227257 | -0.695481 |
| H | -3.489197 | -1.037161 | 4.197421  |
| H | -4.434006 | -3.287914 | 4.182929  |
| H | -5.626146 | -5.104742 | 3.012269  |
| H | -6.283380 | -4.830945 | 0.623647  |
| H | -5.763031 | -2.749647 | -0.572470 |
| O | -3.269121 | -0.056204 | -4.216132 |
| C | -3.045452 | -1.285266 | -4.899717 |
| H | -3.903290 | -1.547495 | -5.531768 |
| H | -2.163129 | -1.135750 | -5.526061 |
| H | -2.856596 | -2.105396 | -4.194984 |

|    |           |           |           |
|----|-----------|-----------|-----------|
| O  | -2.912834 | 1.359296  | 3.085464  |
| C  | -2.633741 | 1.307152  | 4.473000  |
| H  | -1.917768 | 0.512894  | 4.708799  |
| H  | -2.194988 | 2.273647  | 4.723031  |
| H  | -3.555176 | 1.160835  | 5.050320  |
| H  | -0.580084 | -2.497764 | 3.738505  |
| H  | -5.816961 | 0.280867  | -4.705600 |
| C  | -7.967518 | 0.339629  | -3.049141 |
| C  | -8.953669 | 0.364387  | -2.096106 |
| C  | -7.328850 | -0.061443 | -0.355072 |
| C  | -8.628407 | 0.164738  | -0.733824 |
| H  | -9.986573 | 0.542811  | -2.382042 |
| H  | -8.206259 | 0.500715  | -4.097664 |
| H  | -9.413076 | 0.194277  | 0.017018  |
| H  | -7.091374 | -0.205865 | 0.694317  |
| H  | 1.455326  | 0.895554  | 0.369351  |
| C  | 6.429060  | -1.825875 | -0.851256 |
| C  | 7.487484  | -2.382447 | -0.146565 |
| C  | 7.191990  | -3.231194 | 0.911179  |
| C  | 5.882941  | -3.529531 | 1.258997  |
| C  | 4.854858  | -2.948485 | 0.525450  |
| C  | 5.084585  | -2.076932 | -0.546244 |
| H  | 8.512883  | -2.156535 | -0.414973 |
| H  | 5.661258  | -4.197118 | 2.083439  |
| Cl | 3.221838  | -3.360297 | 0.992034  |
| Cl | 8.498444  | -3.939517 | 1.824014  |
| Cl | 6.822440  | -0.749669 | -2.171991 |
| C  | 3.971073  | -1.439031 | -1.336505 |
| H  | 3.022472  | -1.946174 | -1.131475 |
| H  | 4.138627  | -1.553608 | -2.411314 |
| N  | 3.131618  | 0.755211  | -1.867611 |
| C  | 3.764350  | 0.015987  | -1.027792 |
| C  | 4.194436  | 0.628532  | 0.256539  |
| H  | 3.712331  | 0.078668  | 1.074586  |
| H  | 5.276733  | 0.527615  | 0.384464  |
| H  | 3.913769  | 1.680556  | 0.324487  |
| O  | 2.559857  | 0.202120  | -2.966147 |
| C  | 2.805420  | 0.936761  | -4.233182 |
| C  | 4.299750  | 1.170819  | -4.395997 |
| H  | 4.485707  | 1.616668  | -5.378281 |
| H  | 4.686981  | 1.862157  | -3.639994 |
| H  | 4.850270  | 0.226508  | -4.338320 |
| C  | 2.267290  | -0.049884 | -5.258996 |
| H  | 1.205066  | -0.252240 | -5.085164 |

|   |           |           |           |
|---|-----------|-----------|-----------|
| H | 2.372361  | 0.378837  | -6.260297 |
| H | 2.821174  | -0.993846 | -5.227003 |
| C | 2.010069  | 2.236107  | -4.241372 |
| H | 2.143782  | 2.722565  | -5.213664 |
| H | 0.942359  | 2.044391  | -4.103330 |
| H | 2.351659  | 2.937605  | -3.474857 |
| H | 3.015991  | 1.783355  | -1.708746 |
| S | 3.105929  | 4.546779  | -0.807825 |
| C | 4.339299  | 5.816676  | -1.021311 |
| H | 4.481091  | 5.999096  | -2.089081 |
| H | 3.992816  | 6.728549  | -0.528741 |
| H | 5.276350  | 5.482197  | -0.570033 |
| O | 2.979644  | 4.314676  | 0.645196  |
| O | 3.664461  | 3.358123  | -1.528116 |
| O | 1.872091  | 5.052819  | -1.449338 |
| C | -2.499368 | -5.140511 | 0.354185  |
| H | -3.273017 | -5.246750 | -0.413511 |
| H | -2.021256 | -6.120955 | 0.466898  |
| H | -2.985358 | -4.894583 | 1.301688  |
| C | 0.799113  | -3.262959 | -2.971682 |
| H | 1.628257  | -3.980968 | -2.953715 |
| H | 0.109992  | -3.584184 | -3.759599 |
| H | 1.211485  | -2.287431 | -3.245920 |
| C | 0.995263  | -0.870091 | 5.342965  |
| H | 0.047309  | -1.113883 | 5.846356  |
| H | 1.736167  | -0.712772 | 6.134945  |
| C | 1.401045  | -2.046686 | 4.456452  |
| H | 2.400810  | -1.867267 | 4.040617  |
| H | 1.453668  | -2.968605 | 5.045379  |
| H | 0.995017  | 3.771175  | 4.728974  |
| O | 0.361845  | 3.770136  | 2.109852  |
| C | 0.402066  | 5.070573  | 2.659929  |
| H | -0.346403 | 5.172856  | 3.458391  |
| H | 1.394420  | 5.291738  | 3.074980  |
| C | 0.105685  | 6.036649  | 1.539125  |
| H | 0.252219  | 7.066828  | 1.899855  |
| H | 0.801420  | 5.855295  | 0.710265  |
| O | -1.229660 | 5.848531  | 1.110711  |
| C | -1.486397 | 6.472345  | -0.129468 |
| H | -0.823730 | 6.083837  | -0.916006 |
| H | -2.525266 | 6.255180  | -0.392226 |
| H | -1.353801 | 7.563096  | -0.065026 |

-----

**B7fS**

| -----                   |           |           |           |
|-------------------------|-----------|-----------|-----------|
| Coordinates (Angstroms) |           |           |           |
|                         | X         | Y         | Z         |
| -----                   |           |           |           |
| Ir                      | 0.071417  | -0.673201 | -0.376607 |
| C                       | -0.878787 | -1.138069 | 1.351533  |
| N                       | 0.000677  | 1.158767  | 0.590786  |
| C                       | -1.266990 | -2.397192 | 1.859094  |
| C                       | -1.957646 | -2.506191 | 3.061853  |
| C                       | -2.297721 | -1.372090 | 3.811913  |
| C                       | -1.912488 | -0.114749 | 3.386411  |
| C                       | -1.190857 | -0.031090 | 2.176668  |
| C                       | -0.856511 | 2.472984  | 2.534445  |
| C                       | -0.651367 | 1.229127  | 1.717293  |
| C                       | 0.688184  | 2.273949  | 0.036442  |
| C                       | 0.458637  | 2.619657  | -1.292899 |
| C                       | 1.168443  | 3.653467  | -1.899260 |
| C                       | 2.126631  | 4.330877  | -1.137013 |
| C                       | 2.394316  | 3.985654  | 0.192552  |
| C                       | 1.668804  | 2.943044  | 0.767882  |
| O                       | 2.880402  | 5.332707  | -1.716832 |
| C                       | 2.254452  | 6.610589  | -1.689279 |
| H                       | -2.853486 | -1.492145 | 4.739065  |
| H                       | -0.820498 | 3.364594  | 1.902305  |
| H                       | -0.258252 | 2.047445  | -1.872925 |
| H                       | 1.896551  | 2.623742  | 1.780908  |
| H                       | 2.969000  | 7.319735  | -2.113721 |
| H                       | 1.335097  | 6.620626  | -2.288205 |
| H                       | 2.012694  | 6.910255  | -0.661947 |
| C                       | 1.088244  | -2.559643 | -0.960155 |
| C                       | 0.455494  | -1.998103 | -2.106530 |
| C                       | 1.130058  | -0.767731 | -2.416351 |
| C                       | 2.152792  | -0.574004 | -1.446362 |
| C                       | 2.153651  | -1.691595 | -0.544241 |
| C                       | 3.152886  | -2.016736 | 0.536089  |
| C                       | 3.117541  | 0.583279  | -1.436576 |
| C                       | 3.579643  | -0.832062 | 1.375498  |
| C                       | 4.539064  | 0.083229  | -1.506613 |
| C                       | 5.137905  | -0.150238 | -2.774764 |
| C                       | 6.407185  | -0.647043 | -2.886707 |
| C                       | 7.150104  | -0.970351 | -1.722519 |
| C                       | 6.565167  | -0.763686 | -0.441070 |
| C                       | 5.243837  | -0.219428 | -0.358374 |

|   |           |           |           |
|---|-----------|-----------|-----------|
| C | 2.924033  | -0.583590 | 2.623740  |
| C | 3.297087  | 0.468946  | 3.422585  |
| C | 4.346731  | 1.335735  | 3.019347  |
| C | 4.998000  | 1.122709  | 1.775037  |
| C | 4.592877  | 0.007930  | 0.968152  |
| C | 4.767330  | 2.411894  | 3.845155  |
| C | 5.790851  | 3.240100  | 3.455005  |
| C | 6.426033  | 3.042276  | 2.208336  |
| C | 6.032507  | 2.014311  | 1.385882  |
| H | 0.840433  | -3.494241 | -0.482508 |
| H | -0.359029 | -2.437061 | -2.666760 |
| H | 0.924088  | -0.107571 | -3.248983 |
| H | 2.718395  | -2.786751 | 1.178248  |
| H | 4.043711  | -2.457244 | 0.070388  |
| H | 2.891975  | 1.235120  | -2.281972 |
| H | 2.986442  | 1.174783  | -0.529476 |
| H | 2.817460  | 0.652156  | 4.377941  |
| H | 4.268000  | 2.563976  | 4.799205  |
| H | 6.108666  | 4.054686  | 4.100221  |
| H | 7.223390  | 3.711273  | 1.897107  |
| H | 6.521191  | 1.878186  | 0.426155  |
| O | 4.389344  | 0.108109  | -3.903942 |
| C | 4.641632  | 1.385205  | -4.481342 |
| H | 5.667758  | 1.449769  | -4.864602 |
| H | 3.936702  | 1.499906  | -5.307612 |
| H | 4.480694  | 2.189931  | -3.752006 |
| O | 1.952975  | -1.470878 | 2.944871  |
| C | 1.339536  | -1.365270 | 4.216360  |
| H | 0.812658  | -0.411251 | 4.328811  |
| H | 0.620129  | -2.182553 | 4.266782  |
| H | 2.079310  | -1.476474 | 5.019020  |
| H | -0.025539 | 2.558082  | 3.249163  |
| H | 6.840300  | -0.812413 | -3.869625 |
| C | 8.460697  | -1.511718 | -1.809469 |
| C | 9.159276  | -1.842821 | -0.676465 |
| C | 7.312328  | -1.126640 | 0.712878  |
| C | 8.575262  | -1.651423 | 0.597780  |
| H | 10.159736 | -2.259385 | -0.754166 |
| H | 8.899571  | -1.661575 | -2.792964 |
| H | 9.130811  | -1.924796 | 1.490619  |
| H | 6.870053  | -0.992048 | 1.695222  |
| H | -1.434610 | -0.357180 | -0.828693 |
| C | -4.312163 | 3.339924  | -0.446827 |
| C | -5.021776 | 4.491127  | -0.770485 |

|    |           |           |           |
|----|-----------|-----------|-----------|
| C  | -6.403724 | 4.467099  | -0.664157 |
| C  | -7.077614 | 3.329127  | -0.245501 |
| C  | -6.328085 | 2.203336  | 0.067619  |
| C  | -4.929654 | 2.158887  | -0.014716 |
| H  | -4.501713 | 5.383179  | -1.099857 |
| H  | -8.158093 | 3.315758  | -0.162656 |
| Cl | -7.206456 | 0.785765  | 0.587125  |
| Cl | -7.317458 | 5.897060  | -1.067691 |
| Cl | -2.576776 | 3.421568  | -0.607743 |
| C  | -4.165755 | 0.912355  | 0.369944  |
| H  | -4.539712 | 0.507660  | 1.311612  |
| H  | -3.106552 | 1.146461  | 0.529874  |
| N  | -4.335714 | -1.386252 | -0.372336 |
| C  | -4.170486 | -0.151543 | -0.686863 |
| C  | -3.935177 | 0.192978  | -2.115828 |
| H  | -4.827149 | 0.694585  | -2.509955 |
| H  | -3.095735 | 0.890445  | -2.188159 |
| H  | -3.719985 | -0.688103 | -2.723005 |
| O  | -4.519394 | -1.741930 | 0.922906  |
| C  | -5.327866 | -2.967119 | 1.121754  |
| C  | -4.475584 | -4.182117 | 0.779760  |
| H  | -4.952969 | -5.084333 | 1.176342  |
| H  | -4.357039 | -4.306618 | -0.298701 |
| H  | -3.485282 | -4.078973 | 1.226291  |
| C  | -5.625125 | -2.888769 | 2.612016  |
| H  | -6.156241 | -1.962506 | 2.854643  |
| H  | -6.252813 | -3.737016 | 2.901883  |
| H  | -4.700016 | -2.926740 | 3.194211  |
| C  | -6.604283 | -2.913229 | 0.293842  |
| H  | -7.192316 | -3.812432 | 0.504104  |
| H  | -7.212605 | -2.041835 | 0.551463  |
| H  | -6.398505 | -2.901614 | -0.781237 |
| H  | -4.256714 | -2.151487 | -1.094584 |
| S  | -3.011402 | -3.716897 | -2.917815 |
| C  | -3.468341 | -5.172789 | -3.835576 |
| H  | -4.133541 | -4.887094 | -4.653759 |
| H  | -2.560266 | -5.631143 | -4.234909 |
| H  | -3.974912 | -5.871612 | -3.165815 |
| O  | -2.148488 | -4.161380 | -1.805884 |
| O  | -4.313487 | -3.152126 | -2.423986 |
| O  | -2.349783 | -2.804609 | -3.874809 |
| C  | 3.470354  | 4.704331  | 0.959135  |
| H  | 4.426706  | 4.667890  | 0.427207  |
| H  | 3.222792  | 5.763094  | 1.102874  |

|   |           |           |           |
|---|-----------|-----------|-----------|
| H | 3.608949  | 4.254171  | 1.945757  |
| C | 0.930020  | 3.997781  | -3.345009 |
| H | 0.151430  | 4.763454  | -3.450839 |
| H | 1.839438  | 4.382943  | -3.815851 |
| H | 0.598244  | 3.114062  | -3.899790 |
| C | -2.206753 | 1.135333  | 4.184166  |
| H | -1.459038 | 1.241191  | 4.984653  |
| H | -3.179111 | 1.038842  | 4.680668  |
| C | -2.172946 | 2.389944  | 3.312037  |
| H | -3.014549 | 2.378304  | 2.607969  |
| H | -2.284813 | 3.285522  | 3.932029  |
| H | -2.259048 | -3.482681 | 3.429321  |
| O | -0.950422 | -3.499491 | 1.110731  |
| C | -0.816648 | -4.747808 | 1.768731  |
| H | -0.287430 | -4.621207 | 2.722579  |
| H | -1.797094 | -5.197857 | 1.972171  |
| C | -0.032209 | -5.669193 | 0.866933  |
| H | -0.085645 | -6.695464 | 1.262184  |
| H | -0.476122 | -5.664485 | -0.139210 |
| O | 1.308644  | -5.226850 | 0.823262  |
| C | 2.077961  | -5.909498 | -0.141749 |
| H | 1.664672  | -5.776217 | -1.152600 |
| H | 3.086190  | -5.488669 | -0.109547 |
| H | 2.131114  | -6.986838 | 0.076054  |

# B7uR

|    | Coordinates (Angstroms) |           |           |
|----|-------------------------|-----------|-----------|
|    | X                       | Y         | Z         |
| Ir | 0.143522                | -0.731570 | -0.298208 |
| C  | 1.094633                | -0.173633 | -1.983768 |
| N  | -0.109507               | 1.335931  | -0.292732 |
| C  | 1.768020                | -0.988253 | -2.917775 |
| C  | 2.323401                | -0.450437 | -4.073547 |
| C  | 2.294683                | 0.933754  | -4.306198 |
| C  | 1.693673                | 1.787714  | -3.399956 |
| C  | 1.089394                | 1.208241  | -2.264540 |
| C  | 0.369417                | 3.510131  | -1.418697 |
| C  | 0.409845                | 2.015053  | -1.274702 |
| C  | -0.787657               | 1.958270  | 0.793576  |
| C  | -0.342361               | 1.712159  | 2.090580  |
| C  | -1.002181               | 2.255757  | 3.190847  |

|   |           |           |           |
|---|-----------|-----------|-----------|
| C | -2.131386 | 3.048530  | 2.955735  |
| C | -2.608464 | 3.293199  | 1.663571  |
| C | -1.927066 | 2.732031  | 0.583474  |
| O | -2.840185 | 3.571015  | 4.019886  |
| C | -2.309928 | 4.790843  | 4.526187  |
| H | 2.757068  | 1.329132  | -5.207529 |
| H | 0.344941  | 3.991767  | -0.436120 |
| H | 0.519906  | 1.070442  | 2.243693  |
| H | -2.300865 | 2.878251  | -0.425807 |
| H | -2.998065 | 5.132375  | 5.302766  |
| H | -1.314882 | 4.646840  | 4.964606  |
| H | -2.247404 | 5.552284  | 3.738885  |
| C | -0.684426 | -2.697394 | -0.906422 |
| C | 0.037276  | -2.834432 | 0.319446  |
| C | -0.700911 | -2.116436 | 1.333174  |
| C | -1.822129 | -1.513787 | 0.712706  |
| C | -1.835705 | -1.882198 | -0.683305 |
| C | -2.920158 | -1.635532 | -1.696616 |
| C | -2.865600 | -0.675581 | 1.405630  |
| C | -3.511405 | -0.243878 | -1.685300 |
| C | -4.239519 | -1.274563 | 1.212221  |
| C | -4.688263 | -2.277826 | 2.114981  |
| C | -5.905839 | -2.883205 | 1.968476  |
| C | -6.743544 | -2.541947 | 0.876899  |
| C | -6.305526 | -1.562906 | -0.058564 |
| C | -5.038598 | -0.923767 | 0.140280  |
| C | -3.010933 | 0.730128  | -2.605433 |
| C | -3.593889 | 1.967900  | -2.712288 |
| C | -4.688266 | 2.314414  | -1.876374 |
| C | -5.155250 | 1.389669  | -0.903824 |
| C | -4.547858 | 0.091275  | -0.841777 |
| C | -5.330806 | 3.574748  | -1.997577 |
| C | -6.389894 | 3.905292  | -1.188578 |
| C | -6.838720 | 2.997562  | -0.203057 |
| C | -6.229648 | 1.774642  | -0.058772 |
| H | -0.411832 | -3.141803 | -1.853979 |
| H | 0.908909  | -3.452782 | 0.477090  |
| H | -0.451748 | -2.044637 | 2.384160  |
| H | -2.509708 | -1.842226 | -2.687649 |
| H | -3.726154 | -2.361138 | -1.529317 |
| H | -2.620587 | -0.609561 | 2.467784  |
| H | -2.853001 | 0.340300  | 1.006237  |
| H | -3.246966 | 2.696760  | -3.436763 |
| H | -4.971517 | 4.273955  | -2.748977 |

|   |           |           |           |
|---|-----------|-----------|-----------|
| H | -6.879767 | 4.868995  | -1.297579 |
| H | -7.664938 | 3.271404  | 0.447015  |
| H | -6.577265 | 1.086697  | 0.705685  |
| O | -3.838524 | -2.657149 | 3.132280  |
| C | -4.154851 | -2.085046 | 4.397296  |
| H | -5.144441 | -2.408558 | 4.743201  |
| H | -3.394652 | -2.436596 | 5.098229  |
| H | -4.131270 | -0.988495 | 4.352022  |
| O | -1.963195 | 0.316199  | -3.359891 |
| C | -1.514026 | 1.163883  | -4.401417 |
| H | -1.154034 | 2.122399  | -4.012177 |
| H | -0.686897 | 0.638456  | -4.880377 |
| H | -2.312055 | 1.340313  | -5.133364 |
| H | -0.571059 | 3.777902  | -1.920989 |
| H | -6.221279 | -3.644110 | 2.677366  |
| C | -8.001029 | -3.175227 | 0.685999  |
| C | -8.787357 | -2.862198 | -0.393141 |
| C | -7.137538 | -1.274708 | -1.175401 |
| C | -8.345547 | -1.905325 | -1.336810 |
| H | -9.746880 | -3.352987 | -0.530592 |
| H | -8.326231 | -3.916990 | 1.411307  |
| H | -8.966656 | -1.671855 | -2.197150 |
| H | -6.807368 | -0.550018 | -1.912673 |
| C | -3.848544 | 4.119351  | 1.463413  |
| H | -4.715454 | 3.654171  | 1.945165  |
| H | -3.737466 | 5.118978  | 1.899508  |
| H | -4.069130 | 4.236779  | 0.399611  |
| C | -0.515803 | 1.978757  | 4.588264  |
| H | 0.213683  | 2.731446  | 4.912215  |
| H | -1.340570 | 1.988776  | 5.307189  |
| H | -0.021573 | 1.003242  | 4.639357  |
| C | 1.631765  | 3.283678  | -3.595620 |
| C | 1.548009  | 4.016741  | -2.256260 |
| H | 2.504458  | 3.624848  | -4.163746 |
| H | 0.747678  | 3.539280  | -4.199268 |
| H | 2.483162  | 3.869639  | -1.701361 |
| H | 1.434290  | 5.093297  | -2.420004 |
| H | 2.803390  | -1.087664 | -4.809198 |
| O | 1.868630  | -2.313164 | -2.584244 |
| C | 2.584426  | -3.199463 | -3.421586 |
| H | 3.546439  | -2.765001 | -3.723575 |
| H | 2.010513  | -3.428879 | -4.329489 |
| C | 2.816897  | -4.459106 | -2.615770 |
| H | 3.212181  | -5.250980 | -3.263680 |

|    |          |           |           |
|----|----------|-----------|-----------|
| H  | 1.875808 | -4.804510 | -2.178601 |
| O  | 3.706536 | -4.231494 | -1.528931 |
| C  | 5.078712 | -4.369892 | -1.860536 |
| H  | 5.653927 | -4.071080 | -0.980379 |
| H  | 5.308982 | -5.414780 | -2.103423 |
| H  | 5.363991 | -3.731059 | -2.705520 |
| H  | 1.548656 | -0.378857 | 0.391490  |
| C  | 6.629358 | 0.814701  | 1.053213  |
| C  | 7.484531 | 1.870253  | 0.768317  |
| C  | 6.925760 | 3.125068  | 0.568704  |
| C  | 5.557420 | 3.333709  | 0.654311  |
| C  | 4.739282 | 2.247075  | 0.941269  |
| C  | 5.238028 | 0.954058  | 1.144412  |
| H  | 8.555020 | 1.714775  | 0.701744  |
| H  | 5.131989 | 4.319187  | 0.503402  |
| Cl | 3.025412 | 2.559751  | 1.056315  |
| Cl | 7.969285 | 4.472832  | 0.201435  |
| Cl | 7.353161 | -0.761719 | 1.288274  |
| C  | 4.350498 | -0.224741 | 1.446825  |
| H  | 3.342753 | 0.106726  | 1.722408  |
| H  | 4.720369 | -0.780089 | 2.313685  |
| N  | 3.638663 | -2.320267 | 0.511776  |
| C  | 4.180309 | -1.172996 | 0.297150  |
| C  | 4.547748 | -0.814144 | -1.094825 |
| H  | 4.010936 | 0.103079  | -1.363929 |
| H  | 5.618904 | -0.600858 | -1.161998 |
| H  | 4.290493 | -1.604614 | -1.798227 |
| O  | 3.122004 | -2.598838 | 1.735083  |
| C  | 3.642250 | -3.832402 | 2.378012  |
| C  | 5.163225 | -3.816164 | 2.369650  |
| H  | 5.528701 | -4.675958 | 2.939987  |
| H  | 5.568086 | -3.899081 | 1.355454  |
| H  | 5.551443 | -2.907543 | 2.839862  |
| C  | 3.081149 | -3.685328 | 3.784436  |
| H  | 1.988693 | -3.612401 | 3.758679  |
| H  | 3.353539 | -4.562091 | 4.379974  |
| H  | 3.483416 | -2.792519 | 4.273938  |
| C  | 3.074459 | -5.057512 | 1.674447  |
| H  | 3.433268 | -5.958585 | 2.182815  |
| H  | 1.980580 | -5.058871 | 1.715119  |
| H  | 3.391781 | -5.118189 | 0.628285  |
| H  | 3.461478 | -3.004502 | -0.254032 |

-----

**B7uS**

| -----                   |           |           |           |
|-------------------------|-----------|-----------|-----------|
| Coordinates (Angstroms) |           |           |           |
|                         | X         | Y         | Z         |
| -----                   |           |           |           |
| Ir                      | 0.221280  | 0.032175  | -0.193702 |
| C                       | 1.151247  | 1.761743  | -0.648214 |
| N                       | -0.526597 | 1.332989  | 1.251464  |
| C                       | 2.091331  | 2.008866  | -1.669568 |
| C                       | 2.645725  | 3.271341  | -1.846699 |
| C                       | 2.319887  | 4.329049  | -0.985222 |
| C                       | 1.427888  | 4.136855  | 0.054555  |
| C                       | 0.853922  | 2.856143  | 0.192599  |
| C                       | -0.466229 | 3.619354  | 2.243858  |
| C                       | -0.090704 | 2.560683  | 1.247096  |
| C                       | -1.465420 | 0.855847  | 2.207997  |
| C                       | -1.140344 | -0.261090 | 2.975124  |
| C                       | -2.060297 | -0.806522 | 3.868279  |
| C                       | -3.315366 | -0.196275 | 3.977069  |
| C                       | -3.667291 | 0.919297  | 3.209903  |
| C                       | -2.729279 | 1.432682  | 2.314736  |
| O                       | -4.267215 | -0.729367 | 4.823184  |
| C                       | -4.149742 | -0.295170 | 6.173724  |
| H                       | 2.786958  | 5.299593  | -1.134825 |
| H                       | -0.706853 | 3.166381  | 3.210647  |
| H                       | -0.164582 | -0.722983 | 2.854066  |
| H                       | -2.992621 | 2.271384  | 1.676400  |
| H                       | -4.997758 | -0.722556 | 6.713385  |
| H                       | -3.216850 | -0.648514 | 6.629844  |
| H                       | -4.189169 | 0.799055  | 6.243173  |
| C                       | 0.037823  | -0.934527 | -2.184777 |
| C                       | 0.610655  | -1.853389 | -1.253423 |
| C                       | -0.413348 | -2.168890 | -0.285842 |
| C                       | -1.569918 | -1.415566 | -0.605467 |
| C                       | -1.311401 | -0.655839 | -1.800026 |
| C                       | -2.289065 | 0.153054  | -2.610403 |
| C                       | -2.867889 | -1.453337 | 0.157836  |
| C                       | -3.215752 | 1.030752  | -1.799276 |
| C                       | -4.002791 | -1.850580 | -0.754677 |
| C                       | -4.277017 | -3.230798 | -0.958109 |
| C                       | -5.259601 | -3.648215 | -1.812379 |
| C                       | -6.015930 | -2.698364 | -2.544802 |
| C                       | -5.745164 | -1.310669 | -2.377242 |
| C                       | -4.724378 | -0.905055 | -1.457964 |

|   |           |           |           |
|---|-----------|-----------|-----------|
| C | -2.870855 | 2.403901  | -1.592098 |
| C | -3.720412 | 3.254975  | -0.929926 |
| C | -4.953401 | 2.773028  | -0.414911 |
| C | -5.290935 | 1.400382  | -0.559072 |
| C | -4.395058 | 0.542960  | -1.279952 |
| C | -5.864399 | 3.642564  | 0.241621  |
| C | -7.056423 | 3.171451  | 0.734863  |
| C | -7.381154 | 1.801480  | 0.615897  |
| C | -6.514897 | 0.936836  | -0.007948 |
| H | 0.534587  | -0.521734 | -3.051631 |
| H | 1.595173  | -2.294686 | -1.321185 |
| H | -0.342025 | -2.870906 | 0.532704  |
| H | -1.721945 | 0.773539  | -3.308026 |
| H | -2.894343 | -0.532565 | -3.216573 |
| H | -2.769380 | -2.158308 | 0.985654  |
| H | -3.076155 | -0.473826 | 0.591725  |
| H | -3.481959 | 4.304913  | -0.797598 |
| H | -5.604089 | 4.693678  | 0.341686  |
| H | -7.748334 | 3.849459  | 1.226894  |
| H | -8.316679 | 1.430333  | 1.024806  |
| H | -6.769428 | -0.115437 | -0.089054 |
| O | -3.492902 | -4.152623 | -0.296697 |
| C | -4.089859 | -4.677724 | 0.884618  |
| H | -5.014161 | -5.221117 | 0.652300  |
| H | -3.364099 | -5.367546 | 1.321050  |
| H | -4.314309 | -3.880033 | 1.604792  |
| O | -1.678629 | 2.776003  | -2.119418 |
| C | -1.312083 | 4.142134  | -2.054395 |
| H | -1.244999 | 4.491151  | -1.018151 |
| H | -0.328628 | 4.209914  | -2.521489 |
| H | -2.025632 | 4.765184  | -2.607855 |
| H | -1.381817 | 4.114010  | 1.890658  |
| H | -5.443883 | -4.710769 | -1.947826 |
| C | -7.024219 | -3.105764 | -3.459010 |
| C | -7.729461 | -2.179290 | -4.183666 |
| C | -6.486784 | -0.377487 | -3.152697 |
| C | -7.453531 | -0.800354 | -4.030026 |
| H | -8.496868 | -2.500875 | -4.882131 |
| H | -7.223242 | -4.168078 | -3.577700 |
| H | -8.009826 | -0.072751 | -4.614395 |
| H | -6.280047 | 0.683073  | -3.048921 |
| C | -5.038372 | 1.521854  | 3.342721  |
| H | -5.818796 | 0.773457  | 3.169181  |
| H | -5.198809 | 1.924936  | 4.350115  |

|    |           |           |           |
|----|-----------|-----------|-----------|
| H  | -5.175239 | 2.337011  | 2.627635  |
| C  | -1.720623 | -2.031822 | 4.674343  |
| H  | -1.300486 | -1.765269 | 5.651991  |
| H  | -2.610049 | -2.643074 | 4.855088  |
| H  | -0.978269 | -2.644965 | 4.154044  |
| C  | 1.036898  | 5.232736  | 1.016455  |
| C  | 0.649476  | 4.660328  | 2.380585  |
| H  | 1.855002  | 5.954325  | 1.119307  |
| H  | 0.179860  | 5.788943  | 0.607402  |
| H  | 1.528083  | 4.194371  | 2.845649  |
| H  | 0.315493  | 5.460799  | 3.048601  |
| H  | 3.366230  | 3.449485  | -2.638938 |
| O  | 2.424346  | 0.937855  | -2.457585 |
| C  | 3.660637  | 0.945127  | -3.143519 |
| H  | 4.480436  | 1.162461  | -2.444858 |
| H  | 3.674972  | 1.696375  | -3.944277 |
| C  | 3.834631  | -0.419305 | -3.766955 |
| H  | 4.773026  | -0.430219 | -4.343156 |
| H  | 3.007012  | -0.614671 | -4.466395 |
| O  | 3.859614  | -1.401264 | -2.754705 |
| C  | 3.934500  | -2.706563 | -3.281666 |
| H  | 3.916359  | -3.404647 | -2.441962 |
| H  | 3.080200  | -2.920753 | -3.941015 |
| H  | 4.864716  | -2.856792 | -3.849985 |
| H  | 1.441989  | -0.087468 | 0.839371  |
| C  | 6.250272  | 1.175363  | 0.006755  |
| C  | 7.603080  | 1.377534  | -0.243222 |
| C  | 8.407598  | 0.269511  | -0.461146 |
| C  | 7.890752  | -1.016771 | -0.429146 |
| C  | 6.534987  | -1.173992 | -0.173011 |
| C  | 5.663227  | -0.098138 | 0.044490  |
| H  | 8.014914  | 2.379642  | -0.266259 |
| H  | 8.523795  | -1.879822 | -0.598408 |
| Cl | 5.932050  | -2.809716 | -0.121915 |
| Cl | 10.107431 | 0.497200  | -0.776503 |
| Cl | 5.285964  | 2.607032  | 0.268579  |
| C  | 4.180627  | -0.318479 | 0.263543  |
| H  | 3.818081  | -1.127347 | -0.368991 |
| H  | 3.626147  | 0.578145  | -0.033024 |
| N  | 3.227822  | -1.631390 | 2.082205  |
| C  | 3.819925  | -0.555225 | 1.699349  |
| C  | 4.064012  | 0.485987  | 2.732878  |
| H  | 5.128416  | 0.738507  | 2.762648  |
| H  | 3.506324  | 1.386824  | 2.453532  |

|   |          |           |           |
|---|----------|-----------|-----------|
| H | 3.747123 | 0.166193  | 3.728401  |
| O | 2.840997 | -2.606504 | 1.234307  |
| C | 2.583653 | -3.908398 | 1.904004  |
| C | 1.418839 | -3.752012 | 2.878432  |
| H | 1.081561 | -4.745052 | 3.191060  |
| H | 1.691995 | -3.210458 | 3.792221  |
| H | 0.582352 | -3.238621 | 2.396665  |
| C | 2.208925 | -4.788557 | 0.722764  |
| H | 3.012569 | -4.803279 | -0.019896 |
| H | 2.047040 | -5.810801 | 1.077516  |
| H | 1.289813 | -4.440549 | 0.243340  |
| C | 3.854059 | -4.394889 | 2.587710  |
| H | 3.650229 | -5.354090 | 3.073915  |
| H | 4.659941 | -4.542506 | 1.863640  |
| H | 4.199627 | -3.701586 | 3.362561  |
| H | 2.920799 | -1.735234 | 3.050721  |

### TSA2-3

| Coordinates (Angstroms) |           |           |           |
|-------------------------|-----------|-----------|-----------|
|                         | X         | Y         | Z         |
| Ir                      | -1.823224 | 0.245292  | -0.613856 |
| C                       | -2.987801 | -1.402923 | -0.376668 |
| N                       | -1.568589 | -0.198794 | 1.418998  |
| C                       | -3.715467 | -2.065187 | -1.358747 |
| C                       | -4.515801 | -3.171397 | -1.042667 |
| C                       | -4.615202 | -3.633918 | 0.276001  |
| C                       | -3.895913 | -2.978808 | 1.266296  |
| C                       | -3.086758 | -1.883611 | 0.954116  |
| C                       | -2.272593 | -1.543836 | 3.371354  |
| C                       | -2.272083 | -1.172864 | 1.921883  |
| C                       | -0.626275 | 0.554067  | 2.178332  |
| C                       | -0.705267 | 1.942873  | 2.196849  |
| C                       | 0.275828  | 2.701113  | 2.827864  |
| C                       | 1.354835  | 2.062422  | 3.444760  |
| C                       | 1.428249  | 0.665553  | 3.441557  |
| C                       | 0.444899  | -0.080339 | 2.810610  |
| O                       | 2.378247  | 2.708386  | 4.065515  |
| C                       | 2.394570  | 4.125969  | 4.023957  |
| H                       | -5.235888 | -4.484160 | 0.533845  |
| H                       | -1.819905 | -0.772254 | 3.995582  |
| H                       | -1.530299 | 2.442178  | 1.701617  |

|   |           |           |           |
|---|-----------|-----------|-----------|
| H | 0.525408  | -1.160895 | 2.775523  |
| H | 3.304983  | 4.429194  | 4.543958  |
| H | 2.427936  | 4.494093  | 2.991356  |
| H | 1.526090  | 4.552987  | 4.539378  |
| C | -1.185217 | -0.121327 | -2.670456 |
| C | -1.593811 | 1.235287  | -2.570505 |
| C | -0.644418 | 1.917578  | -1.718001 |
| C | 0.288564  | 0.978240  | -1.251691 |
| C | -0.053565 | -0.326750 | -1.800911 |
| C | 0.798425  | -1.570751 | -1.800036 |
| C | 1.463335  | 1.278724  | -0.365531 |
| C | 1.422872  | -1.932443 | -0.470650 |
| C | 2.743276  | 0.891994  | -1.066343 |
| C | 3.346934  | 1.825760  | -1.963209 |
| C | 4.501757  | 1.514652  | -2.633286 |
| C | 5.096358  | 0.235077  | -2.465261 |
| C | 4.489700  | -0.724177 | -1.608750 |
| C | 3.291872  | -0.359620 | -0.907936 |
| C | 0.785503  | -2.922224 | 0.343252  |
| C | 1.333249  | -3.318163 | 1.537433  |
| C | 2.521287  | -2.704628 | 2.015035  |
| C | 3.162132  | -1.705981 | 1.234722  |
| C | 2.600734  | -1.360824 | -0.038473 |
| C | 3.060512  | -3.041321 | 3.284241  |
| C | 4.182355  | -2.409612 | 3.761255  |
| C | 4.816844  | -1.409566 | 2.989338  |
| C | 4.318262  | -1.067525 | 1.755902  |
| H | -1.656693 | -0.889297 | -3.270294 |
| H | -2.420935 | 1.695433  | -3.093934 |
| H | -0.662265 | 2.965632  | -1.451321 |
| H | 0.182887  | -2.401447 | -2.151357 |
| H | 1.592579  | -1.428715 | -2.543066 |
| H | 1.460897  | 2.342597  | -0.120868 |
| H | 1.380834  | 0.725054  | 0.570609  |
| H | 0.864721  | -4.081281 | 2.149304  |
| H | 2.562929  | -3.804973 | 3.877398  |
| H | 4.583363  | -2.673004 | 4.736133  |
| H | 5.698415  | -0.907340 | 3.377404  |
| H | 4.803300  | -0.289290 | 1.174565  |
| H | -1.722207 | -2.479941 | 3.522124  |
| H | 4.973554  | 2.220841  | -3.308116 |
| C | 6.286605  | -0.112758 | -3.157133 |
| C | 6.847709  | -1.357063 | -3.011456 |
| C | 5.085809  | -2.007862 | -1.490351 |

|   |           |           |           |
|---|-----------|-----------|-----------|
| C | 6.238311  | -2.316307 | -2.171272 |
| H | 7.759794  | -1.609275 | -3.545517 |
| H | 6.746374  | 0.626020  | -3.809261 |
| H | 6.683898  | -3.301472 | -2.065533 |
| H | 4.622632  | -2.754375 | -0.852685 |
| H | -3.333560 | 0.865759  | -0.102589 |
| S | -3.077648 | 4.221906  | -0.141923 |
| C | -4.215745 | 5.485690  | 0.373193  |
| H | -3.965172 | 6.407316  | -0.158300 |
| H | -5.232673 | 5.174443  | 0.124837  |
| H | -4.117086 | 5.636973  | 1.450249  |
| O | -3.527216 | 3.001173  | 0.651958  |
| H | -3.167351 | 1.768550  | 0.128436  |
| O | -1.726427 | 4.654277  | 0.255726  |
| O | -3.256206 | 4.012959  | -1.588195 |
| H | 2.275730  | 0.178274  | 3.914821  |
| H | 0.188197  | 3.781631  | 2.811945  |
| H | -3.968005 | -3.341292 | 2.288186  |
| H | -3.300064 | -1.706654 | 3.710439  |
| H | -3.699266 | -1.739768 | -2.395145 |
| O | -5.168463 | -3.730109 | -2.092164 |
| C | -6.026370 | -4.834239 | -1.851986 |
| H | -6.839731 | -4.565862 | -1.167739 |
| H | -6.446734 | -5.099361 | -2.823500 |
| H | -5.472753 | -5.691649 | -1.451594 |
| O | 2.675763  | 2.999156  | -2.082884 |
| C | 3.181663  | 3.975744  | -2.976680 |
| H | 3.228759  | 3.588800  | -4.001662 |
| H | 2.475801  | 4.806885  | -2.935334 |
| H | 4.174559  | 4.323466  | -2.666942 |
| O | -0.359232 | -3.435162 | -0.172002 |
| C | -0.952858 | -4.538610 | 0.488447  |
| H | -0.253542 | -5.382020 | 0.542309  |
| H | -1.285276 | -4.272567 | 1.498106  |
| H | -1.819041 | -4.817776 | -0.112674 |

# TSA5-6uR

|    | Coordinates (Angstroms) |          |           |
|----|-------------------------|----------|-----------|
|    | X                       | Y        | Z         |
| Ir | 0.304951                | 0.381401 | -0.789659 |
| C  | 1.253579                | 2.039837 | -0.152292 |

|   |           |           |           |
|---|-----------|-----------|-----------|
| N | 0.200095  | 0.180461  | 1.285064  |
| C | 1.824132  | 3.038492  | -0.939209 |
| C | 2.567973  | 4.077353  | -0.368032 |
| C | 2.746352  | 4.156950  | 1.021155  |
| C | 2.183139  | 3.172965  | 1.820534  |
| C | 1.448388  | 2.127632  | 1.253407  |
| C | 0.945016  | 0.986561  | 3.505444  |
| C | 0.832428  | 1.059842  | 2.014224  |
| C | -0.632567 | -0.823333 | 1.856302  |
| C | -0.458265 | -2.169372 | 1.524052  |
| C | -1.345110 | -3.122103 | 1.997445  |
| C | -2.435821 | -2.744755 | 2.791111  |
| C | -2.615107 | -1.402848 | 3.127243  |
| C | -1.708183 | -0.454999 | 2.658568  |
| O | -3.265730 | -3.751470 | 3.172556  |
| C | -4.443995 | -3.406759 | 3.883978  |
| H | 3.317797  | 4.958403  | 1.474460  |
| H | 0.626817  | 0.019250  | 3.896944  |
| H | 1.983847  | 1.159836  | 3.804354  |
| H | 0.342933  | -2.466777 | 0.856175  |
| H | -1.866786 | 0.593152  | 2.888978  |
| H | -4.976000 | -4.344803 | 4.051216  |
| H | -4.210388 | -2.946445 | 4.851489  |
| H | -5.075304 | -2.728989 | 3.296771  |
| C | -0.496404 | 1.049320  | -2.723047 |
| C | 0.159519  | -0.202676 | -2.900439 |
| C | -0.600861 | -1.206468 | -2.194104 |
| C | -1.688299 | -0.556863 | -1.561573 |
| C | -1.647749 | 0.851469  | -1.884572 |
| C | -2.691429 | 1.900608  | -1.603013 |
| C | -2.744903 | -1.243054 | -0.738260 |
| C | -3.259903 | 1.865367  | -0.202209 |
| C | -4.115965 | -0.980157 | -1.310023 |
| C | -4.618582 | -1.831281 | -2.331265 |
| C | -5.842580 | -1.616932 | -2.902385 |
| C | -6.632513 | -0.510846 | -2.497419 |
| C | -6.139053 | 0.371603  | -1.494708 |
| C | -4.861489 | 0.108827  | -0.905174 |
| C | -2.702530 | 2.726305  | 0.796201  |
| C | -3.206498 | 2.747964  | 2.072631  |
| C | -4.260131 | 1.868682  | 2.438089  |
| C | -4.810836 | 0.986209  | 1.471095  |
| C | -4.300113 | 1.026951  | 0.132322  |
| C | -4.749548 | 1.825209  | 3.770192  |

|   |           |           |           |
|---|-----------|-----------|-----------|
| C | -5.737277 | 0.941012  | 4.128764  |
| C | -6.280267 | 0.056410  | 3.169012  |
| C | -5.826490 | 0.079101  | 1.872101  |
| H | -0.198288 | 1.992011  | -3.164781 |
| H | 1.035556  | -0.376802 | -3.510675 |
| H | -0.388603 | -2.266223 | -2.151746 |
| H | -2.246061 | 2.879824  | -1.791273 |
| H | -3.507430 | 1.777556  | -2.325888 |
| H | -2.533781 | -2.313313 | -0.717183 |
| H | -2.707490 | -0.885056 | 0.291668  |
| H | -2.804863 | 3.413916  | 2.829012  |
| H | -4.325250 | 2.504914  | 4.505426  |
| H | -6.102902 | 0.916916  | 5.151694  |
| H | -7.058148 | -0.643787 | 3.459897  |
| H | -6.241767 | -0.610634 | 1.143542  |
| O | -3.815864 | -2.866406 | -2.760833 |
| C | -4.162251 | -4.134469 | -2.213183 |
| H | -5.167091 | -4.441631 | -2.528666 |
| H | -3.429086 | -4.849324 | -2.593261 |
| H | -4.120711 | -4.116265 | -1.116191 |
| O | -1.675612 | 3.502289  | 0.370437  |
| C | -1.105022 | 4.421959  | 1.284171  |
| H | -0.697455 | 3.912190  | 2.163586  |
| H | -0.293099 | 4.914276  | 0.746846  |
| H | -1.843286 | 5.169181  | 1.599965  |
| H | -1.227031 | -4.170666 | 1.739646  |
| H | 0.335148  | 1.766046  | 3.976130  |
| H | 2.325962  | 3.231401  | 2.896338  |
| H | 1.737649  | 3.018173  | -2.022482 |
| O | 3.104823  | 4.958373  | -1.249369 |
| C | 3.911204  | 6.014482  | -0.751495 |
| H | 4.250486  | 6.566994  | -1.629308 |
| H | 3.334478  | 6.683712  | -0.102502 |
| H | 4.782204  | 5.628621  | -0.208875 |
| H | -3.456364 | -1.072371 | 3.726649  |
| H | -6.201147 | -2.283952 | -3.681893 |
| C | -7.899660 | -0.254789 | -3.086258 |
| C | -8.642782 | 0.833358  | -2.705650 |
| C | -6.929274 | 1.496489  | -1.131086 |
| C | -8.148539 | 1.720172  | -1.720237 |
| H | -9.610056 | 1.020750  | -3.163477 |
| H | -8.268751 | -0.937778 | -3.847461 |
| H | -8.738326 | 2.585918  | -1.431731 |
| H | -6.557507 | 2.188960  | -0.382004 |

|    |          |           |           |
|----|----------|-----------|-----------|
| H  | 1.832647 | -0.183864 | -0.584639 |
| C  | 6.251590 | -1.095142 | 0.963508  |
| C  | 7.626898 | -1.213695 | 0.807793  |
| C  | 8.271201 | -0.321132 | -0.035317 |
| C  | 7.574812 | 0.678768  | -0.697754 |
| C  | 6.199603 | 0.760092  | -0.516075 |
| C  | 5.482939 | -0.126002 | 0.303814  |
| H  | 8.177362 | -1.983716 | 1.335730  |
| H  | 8.086763 | 1.383922  | -1.342139 |
| Cl | 5.382331 | 2.061534  | -1.349693 |
| Cl | 9.995560 | -0.450648 | -0.257472 |
| Cl | 5.499209 | -2.217057 | 2.074662  |
| C  | 3.978500 | -0.044701 | 0.457184  |
| H  | 3.635354 | 0.954799  | 0.188648  |
| H  | 3.681185 | -0.211630 | 1.496128  |
| N  | 2.862099 | -2.149669 | 0.117071  |
| C  | 3.267000 | -1.029152 | -0.452500 |
| C  | 3.549229 | -1.019051 | -1.921992 |
| H  | 3.518776 | 0.002053  | -2.302770 |
| H  | 4.557989 | -1.424166 | -2.073248 |
| H  | 2.836687 | -1.636491 | -2.466412 |
| O  | 2.058448 | -2.980308 | -0.609357 |
| C  | 2.507939 | -4.382194 | -0.633924 |
| C  | 3.848824 | -4.464636 | -1.349040 |
| H  | 3.772098 | -4.071257 | -2.367680 |
| H  | 4.622156 | -3.907146 | -0.809218 |
| H  | 4.169204 | -5.509958 | -1.406740 |
| C  | 1.395091 | -5.046797 | -1.430365 |
| H  | 1.612927 | -6.112314 | -1.549659 |
| H  | 0.433236 | -4.946657 | -0.916194 |
| H  | 1.311323 | -4.600019 | -2.426876 |
| C  | 2.580522 | -4.919926 | 0.789662  |
| H  | 3.393914 | -4.456368 | 1.358249  |
| H  | 1.635094 | -4.756099 | 1.318427  |
| H  | 2.773964 | -5.996955 | 0.761357  |
| H  | 2.658349 | -2.164768 | 1.115075  |

---

### TSA5-6uS

---

|    | Coordinates (Angstroms) |          |           |
|----|-------------------------|----------|-----------|
|    | X                       | Y        | Z         |
| Ir | 0.308078                | 0.285302 | -0.744017 |

|   |           |           |           |
|---|-----------|-----------|-----------|
| C | 1.200977  | 2.044792  | -0.349903 |
| N | 0.084516  | 0.435391  | 1.321951  |
| C | 1.767064  | 2.931984  | -1.265554 |
| C | 2.404114  | 4.104188  | -0.842533 |
| C | 2.497913  | 4.421632  | 0.520978  |
| C | 1.951072  | 3.544571  | 1.446024  |
| C | 1.308106  | 2.375332  | 1.028387  |
| C | 0.724806  | 1.598951  | 3.412828  |
| C | 0.673241  | 1.432309  | 1.925728  |
| C | -0.731550 | -0.498922 | 2.020196  |
| C | -0.494008 | -1.869183 | 1.901825  |
| C | -1.355672 | -2.777162 | 2.504871  |
| C | -2.465922 | -2.318201 | 3.212963  |
| C | -2.707106 | -0.953517 | 3.335694  |
| C | -1.839172 | -0.046766 | 2.737087  |
| O | -3.356047 | -3.216576 | 3.759672  |
| C | -2.964723 | -3.713532 | 5.034334  |
| H | 2.988891  | 5.326292  | 0.859713  |
| H | 0.458177  | 0.681028  | 3.939219  |
| H | 1.734693  | 1.891377  | 3.715972  |
| H | 0.345465  | -2.220867 | 1.311687  |
| H | -2.037039 | 1.017501  | 2.799555  |
| H | -3.733021 | -4.426829 | 5.340443  |
| H | -1.994956 | -4.224513 | 4.981058  |
| H | -2.906130 | -2.903065 | 5.772465  |
| C | -0.411663 | 0.649906  | -2.783016 |
| C | 0.273892  | -0.599454 | -2.749842 |
| C | -0.514958 | -1.511961 | -1.953437 |
| C | -1.640662 | -0.808731 | -1.469913 |
| C | -1.593725 | 0.548262  | -1.973292 |
| C | -2.664794 | 1.604239  | -1.887984 |
| C | -2.717846 | -1.396610 | -0.597507 |
| C | -3.275254 | 1.774499  | -0.515373 |
| C | -4.078856 | -1.225158 | -1.227453 |
| C | -4.567493 | -2.214402 | -2.124225 |
| C | -5.785681 | -2.089051 | -2.733386 |
| C | -6.586117 | -0.942788 | -2.496510 |
| C | -6.107682 | 0.073509  | -1.622179 |
| C | -4.834908 | -0.095545 | -0.988545 |
| C | -2.777761 | 2.802444  | 0.348056  |
| C | -3.326809 | 3.011050  | 1.588600  |
| C | -4.367490 | 2.165938  | 2.059437  |
| C | -4.857874 | 1.122584  | 1.230576  |
| C | -4.304471 | 0.968158  | -0.082690 |

|   |           |           |           |
|---|-----------|-----------|-----------|
| C | -4.904075 | 2.318948  | 3.364945  |
| C | -5.877432 | 1.468524  | 3.829978  |
| C | -6.357854 | 0.422741  | 3.009496  |
| C | -5.858938 | 0.255290  | 1.740733  |
| H | -0.111797 | 1.528305  | -3.340659 |
| H | 1.175594  | -0.842839 | -3.296854 |
| H | -0.284560 | -2.549300 | -1.748655 |
| H | -2.234825 | 2.552298  | -2.218407 |
| H | -3.455654 | 1.349081  | -2.603868 |
| H | -2.499353 | -2.453534 | -0.434517 |
| H | -2.712833 | -0.909822 | 0.379581  |
| H | -2.967987 | 3.798692  | 2.242571  |
| H | -4.525495 | 3.119990  | 3.995456  |
| H | -6.278961 | 1.595881  | 4.831636  |
| H | -7.119462 | -0.253759 | 3.386789  |
| H | -6.226736 | -0.556513 | 1.120889  |
| O | -3.761083 | -3.299938 | -2.393600 |
| C | -4.095258 | -4.467412 | -1.648732 |
| H | -5.098535 | -4.827370 | -1.907818 |
| H | -3.357397 | -5.227533 | -1.913723 |
| H | -4.050862 | -4.274804 | -0.569033 |
| O | -1.761574 | 3.535711  | -0.169465 |
| C | -1.281973 | 4.643321  | 0.571163  |
| H | -0.885368 | 4.333480  | 1.543864  |
| H | -0.476171 | 5.071888  | -0.026189 |
| H | -2.072156 | 5.391088  | 0.713450  |
| H | -1.189081 | -3.846359 | 2.407795  |
| H | 0.041053  | 2.391919  | 3.736701  |
| H | 2.025358  | 3.788885  | 2.502459  |
| H | 1.738000  | 2.735834  | -2.334423 |
| O | 2.913792  | 4.878958  | -1.833168 |
| C | 3.619229  | 6.057413  | -1.477052 |
| H | 3.949755  | 6.502754  | -2.416827 |
| H | 2.970896  | 6.766821  | -0.949684 |
| H | 4.494638  | 5.825622  | -0.858578 |
| H | -3.583130 | -0.607339 | 3.876302  |
| H | -6.132584 | -2.862087 | -3.413981 |
| C | -7.849639 | -0.780452 | -3.125762 |
| C | -8.605013 | 0.342418  | -2.902536 |
| C | -6.910067 | 1.229936  | -1.421988 |
| C | -8.126818 | 1.359209  | -2.043048 |
| H | -9.569765 | 0.457129  | -3.388811 |
| H | -8.204880 | -1.563521 | -3.791238 |
| H | -8.726127 | 2.250050  | -1.877292 |

|    |           |           |           |
|----|-----------|-----------|-----------|
| H  | -6.552119 | 2.019830  | -0.769176 |
| H  | 1.811350  | -0.247245 | -0.369923 |
| C  | 6.108225  | 0.836434  | 0.241730  |
| C  | 7.435217  | 0.830111  | 0.653890  |
| C  | 8.258601  | -0.196077 | 0.215357  |
| C  | 7.788058  | -1.189855 | -0.629501 |
| C  | 6.454647  | -1.145898 | -1.017549 |
| C  | 5.562569  | -0.150640 | -0.593657 |
| H  | 7.814039  | 1.612447  | 1.301061  |
| H  | 8.441219  | -1.979411 | -0.982680 |
| Cl | 5.924365  | -2.401577 | -2.113988 |
| Cl | 9.925337  | -0.229126 | 0.726164  |
| Cl | 5.125927  | 2.173256  | 0.790340  |
| C  | 4.105874  | -0.137325 | -1.009554 |
| H  | 3.998262  | -0.427110 | -2.057842 |
| H  | 3.703185  | 0.873448  | -0.921114 |
| N  | 2.988566  | -2.233997 | -0.630165 |
| C  | 3.257243  | -1.040147 | -0.132161 |
| C  | 3.251791  | -0.834883 | 1.347949  |
| H  | 4.219069  | -1.173798 | 1.741107  |
| H  | 3.140639  | 0.227256  | 1.570565  |
| H  | 2.455611  | -1.397911 | 1.832191  |
| O  | 2.080721  | -3.015888 | 0.024562  |
| C  | 2.543954  | -4.389508 | 0.274455  |
| C  | 2.820036  | -5.077245 | -1.057032 |
| H  | 1.954806  | -4.996718 | -1.724228 |
| H  | 3.696652  | -4.654784 | -1.560271 |
| H  | 3.023035  | -6.138967 | -0.885326 |
| C  | 1.342135  | -4.998648 | 0.982202  |
| H  | 1.542678  | -6.050834 | 1.206089  |
| H  | 1.141939  | -4.478682 | 1.924671  |
| H  | 0.450063  | -4.945076 | 0.348626  |
| C  | 3.773387  | -4.352831 | 1.170545  |
| H  | 4.607199  | -3.838349 | 0.680798  |
| H  | 3.551498  | -3.848549 | 2.116536  |
| H  | 4.095597  | -5.375419 | 1.392438  |
| H  | 2.974527  | -2.366290 | -1.639261 |

---

### TSA5f-1R

---

Coordinates (Angstroms)

X

Y

Z

---

|    |           |           |           |
|----|-----------|-----------|-----------|
| Ir | 0.059698  | -0.379858 | 0.259228  |
| C  | 0.760552  | -2.155025 | -0.378564 |
| N  | -0.432026 | -0.339537 | -1.775105 |
| C  | 1.408095  | -3.118533 | 0.388437  |
| C  | 1.949464  | -4.264135 | -0.204855 |
| C  | 1.811590  | -4.497787 | -1.580246 |
| C  | 1.170363  | -3.543014 | -2.357265 |
| C  | 0.653428  | -2.383376 | -1.776132 |
| C  | -0.166285 | -1.390837 | -4.003291 |
| C  | -0.014763 | -1.331934 | -2.514121 |
| C  | -1.230407 | 0.716887  | -2.295336 |
| C  | -0.876431 | 2.044180  | -2.074026 |
| C  | -1.704100 | 3.084363  | -2.488557 |
| C  | -2.916477 | 2.792973  | -3.118278 |
| C  | -3.277582 | 1.460753  | -3.343335 |
| C  | -2.440325 | 0.435365  | -2.936001 |
| O  | -3.809284 | 3.726793  | -3.542087 |
| C  | -3.542918 | 5.088824  | -3.252817 |
| H  | 2.209627  | -5.391347 | -2.046299 |
| H  | -0.423418 | -0.420485 | -4.430807 |
| H  | 0.770474  | -1.731139 | -4.455191 |
| H  | 0.040701  | 2.272529  | -1.542202 |
| H  | -2.740463 | -0.595977 | -3.083454 |
| H  | -4.400056 | 5.646415  | -3.634128 |
| H  | -3.452999 | 5.256391  | -2.172640 |
| H  | -2.632952 | 5.435857  | -3.756999 |
| C  | -0.473329 | -0.886627 | 2.323050  |
| C  | 0.315163  | 0.297235  | 2.340804  |
| C  | -0.455825 | 1.348631  | 1.712030  |
| C  | -1.678905 | 0.794201  | 1.278427  |
| C  | -1.707297 | -0.609896 | 1.640865  |
| C  | -2.879229 | -1.555307 | 1.592282  |
| C  | -2.792451 | 1.537175  | 0.591852  |
| C  | -3.670345 | -1.529498 | 0.304292  |
| C  | -4.071812 | 1.425819  | 1.384778  |
| C  | -4.322005 | 2.363465  | 2.432759  |
| C  | -5.471106 | 2.298320  | 3.178024  |
| C  | -6.416833 | 1.265958  | 2.936008  |
| C  | -6.169074 | 0.298457  | 1.924219  |
| C  | -4.969271 | 0.409771  | 1.146142  |
| C  | -3.380917 | -2.499292 | -0.708258 |
| C  | -4.099063 | -2.537828 | -1.877107 |
| C  | -5.103997 | -1.565711 | -2.128400 |
| C  | -5.386047 | -0.574025 | -1.151879 |

|   |           |           |           |
|---|-----------|-----------|-----------|
| C | -4.665100 | -0.601580 | 0.087066  |
| C | -5.806369 | -1.538690 | -3.361979 |
| C | -6.740533 | -0.565087 | -3.618972 |
| C | -7.012664 | 0.429832  | -2.652773 |
| C | -6.351009 | 0.423630  | -1.448963 |
| H | -0.195508 | -1.837984 | 2.757491  |
| H | 1.289479  | 0.396847  | 2.802113  |
| H | -0.157381 | 2.381862  | 1.588994  |
| H | -2.504588 | -2.565127 | 1.772328  |
| H | -3.547692 | -1.310878 | 2.426968  |
| H | -2.505771 | 2.582958  | 0.468069  |
| H | -2.955202 | 1.125233  | -0.405209 |
| H | -3.901036 | -3.284938 | -2.638118 |
| H | -5.585089 | -2.300224 | -4.106064 |
| H | -7.267842 | -0.553869 | -4.568898 |
| H | -7.744640 | 1.203478  | -2.866366 |
| H | -6.559193 | 1.197453  | -0.716636 |
| O | -3.341042 | 3.288083  | 2.607478  |
| C | -3.524112 | 4.266452  | 3.616701  |
| H | -3.616432 | 3.803980  | 4.606527  |
| H | -2.630214 | 4.891953  | 3.593653  |
| H | -4.407138 | 4.884275  | 3.414099  |
| O | -2.376946 | -3.356144 | -0.401379 |
| C | -2.066991 | -4.393375 | -1.314204 |
| H | -1.792424 | -3.994516 | -2.296784 |
| H | -1.211448 | -4.917373 | -0.885730 |
| H | -2.910338 | -5.087303 | -1.419407 |
| H | -1.400338 | 4.107570  | -2.297271 |
| H | -0.945674 | -2.108862 | -4.283559 |
| H | 1.078799  | -3.718189 | -3.425874 |
| H | 1.558237  | -2.984091 | 1.454991  |
| O | 2.615329  | -5.095069 | 0.638310  |
| C | 3.188891  | -6.278240 | 0.108053  |
| H | 3.684507  | -6.770983 | 0.946363  |
| H | 2.422278  | -6.947447 | -0.301220 |
| H | 3.931889  | -6.052310 | -0.665710 |
| H | -4.228274 | 1.244333  | -3.821625 |
| H | -5.677706 | 3.013571  | 3.967011  |
| C | -7.608575 | 1.172913  | 3.702423  |
| C | -8.510489 | 0.161950  | 3.481658  |
| C | -7.114262 | -0.743274 | 1.728901  |
| C | -8.257904 | -0.809556 | 2.486765  |
| H | -9.419967 | 0.102745  | 4.073256  |
| H | -7.793901 | 1.918068  | 4.472270  |

|    |           |           |           |
|----|-----------|-----------|-----------|
| H  | -8.971829 | -1.611779 | 2.322706  |
| H  | -6.925784 | -1.496573 | 0.970185  |
| H  | 1.588201  | 0.057072  | -0.273388 |
| C  | 5.682931  | 2.155052  | 0.576436  |
| C  | 6.699910  | 3.053315  | 0.273291  |
| C  | 6.361495  | 4.255476  | -0.327809 |
| C  | 5.041365  | 4.578218  | -0.602861 |
| C  | 4.057069  | 3.650465  | -0.285242 |
| C  | 4.330598  | 2.399655  | 0.291136  |
| H  | 7.731011  | 2.818334  | 0.509971  |
| H  | 4.780353  | 5.530078  | -1.050135 |
| Cl | 2.406621  | 4.145982  | -0.609089 |
| Cl | 7.620480  | 5.396149  | -0.724894 |
| Cl | 6.164011  | 0.690178  | 1.393561  |
| C  | 3.234898  | 1.396693  | 0.584162  |
| H  | 2.290218  | 1.921664  | 0.711218  |
| H  | 3.429646  | 0.864838  | 1.520618  |
| N  | 3.764010  | -0.734284 | -0.388274 |
| C  | 3.068818  | 0.385273  | -0.552097 |
| C  | 2.861158  | 0.872387  | -1.958321 |
| H  | 2.139776  | 1.687312  | -1.973573 |
| H  | 3.817215  | 1.239229  | -2.350713 |
| H  | 2.509456  | 0.067429  | -2.604289 |
| O  | 3.767558  | -1.645423 | -1.417955 |
| C  | 5.112390  | -2.077305 | -1.798081 |
| C  | 5.753084  | -2.822509 | -0.631110 |
| H  | 6.667496  | -3.322332 | -0.967964 |
| H  | 6.023816  | -2.143545 | 0.183267  |
| H  | 5.063333  | -3.576909 | -0.236522 |
| C  | 4.835441  | -3.012294 | -2.967144 |
| H  | 4.264824  | -2.496071 | -3.747247 |
| H  | 5.782350  | -3.351317 | -3.398871 |
| H  | 4.268750  | -3.889560 | -2.642221 |
| C  | 5.942251  | -0.878084 | -2.241572 |
| H  | 6.947048  | -1.209907 | -2.524507 |
| H  | 5.486172  | -0.387398 | -3.108032 |
| H  | 6.047615  | -0.145281 | -1.435465 |
| H  | 3.866650  | -1.164054 | 0.549064  |
| S  | 3.500370  | -1.642038 | 3.397331  |
| C  | 4.692790  | -2.247764 | 4.575274  |
| H  | 5.660278  | -1.782611 | 4.370707  |
| H  | 4.361266  | -1.988871 | 5.583823  |
| H  | 4.771188  | -3.332934 | 4.475444  |
| O  | 2.216618  | -2.301806 | 3.726211  |

|   |          |           |          |
|---|----------|-----------|----------|
| O | 4.035552 | -2.047426 | 2.066146 |
| O | 3.455409 | -0.170101 | 3.571709 |

---

**TSA5f-1S**

---

| Coordinates (Angstroms) |           |           |           |
|-------------------------|-----------|-----------|-----------|
|                         | X         | Y         | Z         |
| <hr/>                   |           |           |           |
| Ir                      | -0.047755 | -0.446384 | 0.109594  |
| C                       | -0.936476 | -0.120281 | 1.882980  |
| N                       | 0.228285  | 1.615148  | 0.367040  |
| C                       | -1.561019 | -1.071940 | 2.686464  |
| C                       | -2.214852 | -0.702790 | 3.866124  |
| C                       | -2.269432 | 0.639827  | 4.269816  |
| C                       | -1.651639 | 1.598503  | 3.480084  |
| C                       | -0.985234 | 1.235354  | 2.304825  |
| C                       | -0.229093 | 3.630632  | 1.733006  |
| C                       | -0.304538 | 2.166480  | 1.425024  |
| C                       | 1.061468  | 2.341031  | -0.531190 |
| C                       | 0.831577  | 2.288667  | -1.902377 |
| C                       | 1.693592  | 2.918060  | -2.796501 |
| C                       | 2.815910  | 3.596205  | -2.315663 |
| C                       | 3.055595  | 3.647045  | -0.939088 |
| C                       | 2.185626  | 3.024385  | -0.059117 |
| O                       | 3.729673  | 4.226913  | -3.100661 |
| C                       | 3.573454  | 4.140710  | -4.507379 |
| H                       | -2.780424 | 0.937635  | 5.177875  |
| H                       | -0.025057 | 4.227942  | 0.842151  |
| H                       | -1.165334 | 3.975323  | 2.179026  |
| H                       | -0.015452 | 1.732063  | -2.285194 |
| H                       | 2.395882  | 3.039364  | 1.003811  |
| H                       | 4.423332  | 4.674896  | -4.935580 |
| H                       | 3.593317  | 3.098413  | -4.847995 |
| H                       | 2.643757  | 4.619652  | -4.837554 |
| C                       | 0.664589  | -2.491062 | 0.443765  |
| C                       | -0.006972 | -2.446755 | -0.808196 |
| C                       | 0.786119  | -1.633218 | -1.704335 |
| C                       | 1.901920  | -1.151750 | -0.987443 |
| C                       | 1.836516  | -1.664846 | 0.367592  |
| C                       | 2.901788  | -1.611407 | 1.430623  |
| C                       | 2.990957  | -0.270536 | -1.538517 |
| C                       | 3.536872  | -0.255817 | 1.637757  |
| C                       | 4.344112  | -0.919738 | -1.369322 |

|   |           |           |           |
|---|-----------|-----------|-----------|
| C | 4.821801  | -1.806654 | -2.382928 |
| C | 6.041897  | -2.422031 | -2.266140 |
| C | 6.836316  | -2.210361 | -1.107449 |
| C | 6.365058  | -1.359900 | -0.071101 |
| C | 5.097705  | -0.708520 | -0.237291 |
| C | 3.061228  | 0.581831  | 2.697065  |
| C | 3.649099  | 1.794420  | 2.957919  |
| C | 4.703128  | 2.268267  | 2.130990  |
| C | 5.165519  | 1.470202  | 1.051410  |
| C | 4.577081  | 0.179178  | 0.847002  |
| C | 5.279066  | 3.549583  | 2.336744  |
| C | 6.263228  | 4.021189  | 1.502521  |
| C | 6.714889  | 3.232482  | 0.420181  |
| C | 6.177963  | 1.987198  | 0.201779  |
| H | 0.353708  | -3.058516 | 1.311091  |
| H | -0.909725 | -2.983484 | -1.058952 |
| H | 0.562999  | -1.421779 | -2.742150 |
| H | 2.459956  | -1.955413 | 2.368233  |
| H | 3.682419  | -2.334816 | 1.164929  |
| H | 2.789952  | -0.070677 | -2.592900 |
| H | 2.989268  | 0.689357  | -1.019112 |
| H | 3.311980  | 2.424026  | 3.774430  |
| H | 4.921285  | 4.156816  | 3.164905  |
| H | 6.694254  | 5.004576  | 1.669499  |
| H | 7.484376  | 3.615980  | -0.243795 |
| H | 6.522922  | 1.392912  | -0.638656 |
| O | 3.973016  | -1.968146 | -3.431433 |
| C | 4.382908  | -2.803734 | -4.500243 |
| H | 4.538021  | -3.835225 | -4.162182 |
| H | 3.569384  | -2.781054 | -5.227236 |
| H | 5.299670  | -2.426728 | -4.969231 |
| O | 2.026693  | 0.066441  | 3.404937  |
| C | 1.560480  | 0.774858  | 4.538703  |
| H | 1.192255  | 1.770202  | 4.266758  |
| H | 0.735664  | 0.182813  | 4.937412  |
| H | 2.349326  | 0.864274  | 5.296075  |
| H | 1.484632  | 2.856451  | -3.858370 |
| H | 0.565682  | 3.824756  | 2.463341  |
| H | -1.694001 | 2.636275  | 3.799158  |
| H | -1.577003 | -2.120451 | 2.403317  |
| O | -2.781733 | -1.720721 | 4.561946  |
| C | -3.501938 | -1.419843 | 5.746046  |
| H | -3.876910 | -2.374936 | 6.117864  |
| H | -2.850545 | -0.968646 | 6.503495  |

|    |           |           |           |
|----|-----------|-----------|-----------|
| H  | -4.348816 | -0.754913 | 5.539816  |
| H  | 3.939110  | 4.162069  | -0.573572 |
| H  | 6.418297  | -3.088966 | -3.034339 |
| C  | 8.095081  | -2.850402 | -0.955822 |
| C  | 8.847413  | -2.664913 | 0.177404  |
| C  | 7.159744  | -1.199021 | 1.094591  |
| C  | 8.371694  | -1.833479 | 1.216356  |
| H  | 9.807943  | -3.162187 | 0.281265  |
| H  | 8.450784  | -3.497240 | -1.754399 |
| H  | 8.965276  | -1.698980 | 2.116236  |
| H  | 6.800679  | -0.566425 | 1.900341  |
| H  | -1.563683 | -0.013008 | -0.441905 |
| C  | -4.890188 | 2.826894  | -0.226441 |
| C  | -5.967927 | 3.624590  | -0.591111 |
| C  | -7.162933 | 3.004274  | -0.921215 |
| C  | -7.296961 | 1.625429  | -0.874748 |
| C  | -6.192994 | 0.866054  | -0.504380 |
| C  | -4.947682 | 1.425379  | -0.180748 |
| H  | -5.872112 | 4.703897  | -0.613357 |
| H  | -8.238952 | 1.146643  | -1.115275 |
| Cl | -6.429163 | -0.860695 | -0.424955 |
| Cl | -8.530803 | 3.979776  | -1.392510 |
| Cl | -3.422354 | 3.676104  | 0.209552  |
| C  | -3.742916 | 0.582241  | 0.182281  |
| H  | -4.030528 | -0.270758 | 0.801823  |
| H  | -3.049305 | 1.179557  | 0.773492  |
| N  | -3.294760 | -1.155571 | -1.415068 |
| C  | -3.006063 | 0.089933  | -1.058051 |
| C  | -2.653704 | 1.077613  | -2.132435 |
| H  | -2.215078 | 1.972544  | -1.691012 |
| H  | -1.959996 | 0.642947  | -2.850956 |
| H  | -3.573682 | 1.360386  | -2.658912 |
| O  | -2.581223 | -1.666254 | -2.472197 |
| C  | -3.413603 | -2.315182 | -3.485912 |
| C  | -4.123069 | -3.515538 | -2.870243 |
| H  | -3.403256 | -4.201503 | -2.412777 |
| H  | -4.845549 | -3.211611 | -2.105919 |
| H  | -4.670390 | -4.058744 | -3.648137 |
| C  | -2.375828 | -2.743492 | -4.514243 |
| H  | -2.867237 | -3.246731 | -5.352823 |
| H  | -1.835709 | -1.872795 | -4.902337 |
| H  | -1.652175 | -3.437301 | -4.072807 |
| C  | -4.396684 | -1.306719 | -4.067291 |
| H  | -5.093213 | -0.946726 | -3.302939 |

|   |           |           |           |
|---|-----------|-----------|-----------|
| H | -3.868833 | -0.449576 | -4.498142 |
| H | -4.983883 | -1.781470 | -4.860312 |
| H | -3.505172 | -1.857898 | -0.680576 |
| S | -3.439653 | -4.199871 | 1.029029  |
| C | -3.976537 | -4.492187 | 2.701128  |
| H | -3.541055 | -3.729087 | 3.351562  |
| H | -5.067143 | -4.436322 | 2.740030  |
| H | -3.644606 | -5.485909 | 3.012819  |
| O | -4.095045 | -5.220600 | 0.182676  |
| O | -1.962451 | -4.308978 | 1.042289  |
| O | -3.909386 | -2.815651 | 0.719521  |

# TSA7-8uR

|    | Coordinates (Angstroms) |           |           |
|----|-------------------------|-----------|-----------|
|    | X                       | Y         | Z         |
| Ir | 0.500320                | -0.737231 | 0.375649  |
| C  | 1.130473                | -2.353591 | -0.640502 |
| N  | 0.224238                | -0.153285 | -1.612652 |
| C  | 1.579812                | -3.559869 | -0.105997 |
| C  | 2.065435                | -4.585562 | -0.928547 |
| C  | 2.136952                | -4.418942 | -2.318129 |
| C  | 1.683949                | -3.227306 | -2.868369 |
| C  | 1.175819                | -2.212299 | -2.053980 |
| C  | 0.603359                | -0.628997 | -4.009499 |
| C  | 0.644771                | -0.955215 | -2.549682 |
| C  | -0.444748               | 1.069629  | -1.899028 |
| C  | 0.062531                | 2.274375  | -1.410578 |
| C  | -0.646005               | 3.450753  | -1.586432 |
| C  | -1.882430               | 3.437750  | -2.246364 |
| C  | -2.382368               | 2.239773  | -2.756982 |
| C  | -1.655794               | 1.064213  | -2.579813 |
| O  | -2.519046               | 4.635590  | -2.336069 |
| C  | -3.813553               | 4.657254  | -2.916564 |
| H  | 2.523867                | -5.198267 | -2.964174 |
| H  | 0.436425                | 0.434529  | -4.187293 |
| H  | 1.545287                | -0.918172 | -4.484843 |
| H  | 1.007349                | 2.278816  | -0.878588 |
| H  | -2.056153               | 0.126448  | -2.948032 |
| H  | -4.164300               | 5.686710  | -2.825396 |
| H  | -3.781898               | 4.378145  | -3.976719 |
| H  | -4.499781               | 3.990421  | -2.380927 |

|   |           |           |           |
|---|-----------|-----------|-----------|
| C | -0.262863 | -1.723361 | 2.177184  |
| C | 0.595274  | -0.655845 | 2.564988  |
| C | -0.057764 | 0.581175  | 2.195536  |
| C | -1.265496 | 0.267452  | 1.542042  |
| C | -1.414303 | -1.175472 | 1.515361  |
| C | -2.630385 | -1.972986 | 1.121868  |
| C | -2.255853 | 1.263331  | 1.004356  |
| C | -3.298937 | -1.533723 | -0.162067 |
| C | -3.604614 | 1.053661  | 1.650271  |
| C | -3.877341 | 1.683232  | 2.903353  |
| C | -5.080372 | 1.503260  | 3.536072  |
| C | -6.063260 | 0.650834  | 2.964322  |
| C | -5.797722 | -0.015533 | 1.737035  |
| C | -4.538727 | 0.212979  | 1.089434  |
| C | -2.984135 | -2.217018 | -1.379924 |
| C | -3.600922 | -1.879893 | -2.558763 |
| C | -4.518103 | -0.796204 | -2.600064 |
| C | -4.822853 | -0.084116 | -1.410026 |
| C | -4.210764 | -0.500907 | -0.182921 |
| C | -5.104072 | -0.376880 | -3.823605 |
| C | -5.952399 | 0.702410  | -3.864052 |
| C | -6.253997 | 1.413797  | -2.680203 |
| C | -5.700372 | 1.029418  | -1.482902 |
| H | -0.090035 | -2.777072 | 2.356649  |
| H | 1.525450  | -0.753314 | 3.108952  |
| H | 0.306573  | 1.580024  | 2.387500  |
| H | -2.337631 | -3.022114 | 1.041279  |
| H | -3.357459 | -1.910127 | 1.941005  |
| H | -1.886749 | 2.273622  | 1.191970  |
| H | -2.351034 | 1.146368  | -0.076487 |
| H | -3.382125 | -2.403851 | -3.482722 |
| H | -4.863892 | -0.922857 | -4.732974 |
| H | -6.392793 | 1.014451  | -4.807016 |
| H | -6.925828 | 2.266672  | -2.719078 |
| H | -5.928586 | 1.586818  | -0.579632 |
| O | -2.856509 | 2.439399  | 3.383766  |
| C | -3.023125 | 3.072516  | 4.640761  |
| H | -3.199298 | 2.337296  | 5.435179  |
| H | -2.085787 | 3.596931  | 4.834027  |
| H | -3.846274 | 3.796596  | 4.616897  |
| O | -2.061392 | -3.203478 | -1.258493 |
| C | -1.735229 | -3.964673 | -2.407949 |
| H | -1.319752 | -3.333035 | -3.200696 |
| H | -0.980939 | -4.683478 | -2.085384 |

|    |           |           |           |
|----|-----------|-----------|-----------|
| H  | -2.614460 | -4.499527 | -2.787266 |
| H  | -0.263050 | 4.392725  | -1.205002 |
| H  | -0.199860 | -1.188679 | -4.502992 |
| H  | 1.728663  | -3.102769 | -3.946915 |
| H  | 1.578196  | -3.734075 | 0.965690  |
| O  | 2.455579  | -5.709940 | -0.281401 |
| C  | 3.095631  | -6.737119 | -1.022270 |
| H  | 3.377995  | -7.496703 | -0.292028 |
| H  | 2.415849  | -7.178819 | -1.760163 |
| H  | 3.995420  | -6.362829 | -1.524161 |
| H  | -3.334430 | 2.193749  | -3.273714 |
| H  | -5.301110 | 1.986821  | 4.481730  |
| C  | -7.309617 | 0.434868  | 3.609541  |
| C  | -8.245444 | -0.411409 | 3.068463  |
| C  | -6.780294 | -0.893903 | 1.208370  |
| C  | -7.976123 | -1.086316 | 1.856221  |
| H  | -9.194778 | -0.567718 | 3.573495  |
| H  | -7.508762 | 0.949470  | 4.546485  |
| H  | -8.717047 | -1.762604 | 1.439102  |
| H  | -6.579915 | -1.420039 | 0.279959  |
| H  | 2.068152  | -0.218184 | 0.135873  |
| C  | 5.826013  | 2.250095  | 0.043439  |
| C  | 6.352205  | 3.426979  | -0.471415 |
| C  | 5.556239  | 4.562818  | -0.455557 |
| C  | 4.278133  | 4.539318  | 0.079595  |
| C  | 3.793360  | 3.337426  | 0.583026  |
| C  | 4.526521  | 2.142811  | 0.563112  |
| H  | 7.359876  | 3.454752  | -0.869458 |
| H  | 3.670355  | 5.435970  | 0.112422  |
| Cl | 2.203180  | 3.396986  | 1.306251  |
| Cl | 6.184022  | 6.056218  | -1.100256 |
| Cl | 6.882468  | 0.856748  | 0.048676  |
| C  | 3.988054  | 0.837911  | 1.101847  |
| H  | 3.085712  | 1.015571  | 1.685279  |
| H  | 4.712567  | 0.404751  | 1.796128  |
| N  | 4.020219  | -1.466384 | 0.329386  |
| C  | 3.689138  | -0.212350 | 0.030015  |
| C  | 3.713264  | 0.128737  | -1.431237 |
| H  | 3.138925  | 1.037862  | -1.618215 |
| H  | 4.746433  | 0.295495  | -1.754375 |
| H  | 3.299950  | -0.690477 | -2.023724 |
| O  | 3.828065  | -1.843503 | 1.636064  |
| C  | 4.846790  | -2.766345 | 2.156044  |
| C  | 6.220266  | -2.114011 | 2.098002  |

|   |          |           |           |
|---|----------|-----------|-----------|
| H | 6.956861 | -2.775881 | 2.565256  |
| H | 6.531592 | -1.943972 | 1.062987  |
| H | 6.228448 | -1.160466 | 2.635364  |
| C | 4.369351 | -2.962251 | 3.587724  |
| H | 3.359109 | -3.385405 | 3.603075  |
| H | 5.039829 | -3.650100 | 4.111744  |
| H | 4.360373 | -2.008562 | 4.126123  |
| C | 4.816217 | -4.075864 | 1.375687  |
| H | 5.556052 | -4.763653 | 1.798616  |
| H | 3.834804 | -4.551419 | 1.439108  |
| H | 5.074952 | -3.932952 | 0.320071  |
| H | 3.747389 | -2.198079 | -0.327937 |

# TSA7-8uS

| Coordinates (Angstroms) |           |           |           |
|-------------------------|-----------|-----------|-----------|
|                         | X         | Y         | Z         |
| Ir                      | -0.404430 | -0.132580 | -0.521221 |
| C                       | -1.317657 | -1.927677 | -0.501855 |
| N                       | -0.027930 | -0.798017 | 1.420051  |
| C                       | -1.975036 | -2.554382 | -1.559394 |
| C                       | -2.588980 | -3.801818 | -1.396571 |
| C                       | -2.572727 | -4.457291 | -0.156583 |
| C                       | -1.931181 | -3.843038 | 0.909700  |
| C                       | -1.304220 | -2.604556 | 0.748032  |
| C                       | -0.470994 | -2.476163 | 3.182757  |
| C                       | -0.570370 | -1.922838 | 1.796089  |
| C                       | 0.838020  | -0.039953 | 2.256192  |
| C                       | 0.573565  | 1.310561  | 2.499111  |
| C                       | 1.478818  | 2.084742  | 3.204487  |
| C                       | 2.675829  | 1.523193  | 3.668937  |
| C                       | 2.936222  | 0.170750  | 3.449176  |
| C                       | 2.013152  | -0.599106 | 2.744648  |
| O                       | 3.518172  | 2.372351  | 4.313986  |
| C                       | 4.788682  | 1.876412  | 4.706525  |
| H                       | -3.047361 | -5.421306 | -0.016607 |
| H                       | -0.145512 | -1.723685 | 3.903006  |
| H                       | -1.442507 | -2.866576 | 3.500191  |
| H                       | -0.333861 | 1.758868  | 2.110353  |
| H                       | 2.230648  | -1.641982 | 2.544332  |
| H                       | 5.320431  | 2.726154  | 5.137658  |
| H                       | 4.696066  | 1.087157  | 5.462377  |

|   |           |           |           |
|---|-----------|-----------|-----------|
| H | 5.347449  | 1.494122  | 3.843787  |
| C | 0.178142  | -0.058513 | -2.642741 |
| C | -0.482290 | 1.158569  | -2.308571 |
| C | 0.375731  | 1.874664  | -1.393458 |
| C | 1.511084  | 1.081006  | -1.134016 |
| C | 1.411462  | -0.137228 | -1.911436 |
| C | 2.471248  | -1.185499 | -2.130543 |
| C | 2.654974  | 1.469279  | -0.237457 |
| C | 3.200734  | -1.626491 | -0.881333 |
| C | 3.952194  | 1.455861  | -1.008294 |
| C | 4.341975  | 2.617350  | -1.729312 |
| C | 5.492042  | 2.648108  | -2.468914 |
| C | 6.317071  | 1.497286  | -2.548122 |
| C | 5.932755  | 0.312279  | -1.858482 |
| C | 4.727976  | 0.316884  | -1.084532 |
| C | 2.765829  | -2.813067 | -0.209684 |
| C | 3.423593  | -3.279928 | 0.900422  |
| C | 4.513121  | -2.547898 | 1.442605  |
| C | 4.942992  | -1.350275 | 0.811855  |
| C | 4.276732  | -0.924268 | -0.384016 |
| C | 5.155085  | -2.968029 | 2.637098  |
| C | 6.175467  | -2.230064 | 3.185097  |
| C | 6.600770  | -1.034885 | 2.561367  |
| C | 5.997737  | -0.606408 | 1.403334  |
| H | -0.176285 | -0.802685 | -3.344964 |
| H | -1.407718 | 1.523064  | -2.733985 |
| H | 0.197071  | 2.856718  | -0.981058 |
| H | 2.000051  | -2.051124 | -2.601790 |
| H | 3.199668  | -0.790681 | -2.849741 |
| H | 2.460254  | 2.463112  | 0.171098  |
| H | 2.723333  | 0.777394  | 0.604430  |
| H | 3.113177  | -4.190340 | 1.401732  |
| H | 4.818246  | -3.884169 | 3.116307  |
| H | 6.657285  | -2.562211 | 4.100488  |
| H | 7.406817  | -0.454310 | 3.001014  |
| H | 6.324598  | 0.316998  | 0.935265  |
| O | 3.499201  | 3.707387  | -1.692278 |
| C | 3.927614  | 4.742619  | -0.813072 |
| H | 4.875958  | 5.179771  | -1.148562 |
| H | 3.148478  | 5.507861  | -0.830463 |
| H | 4.047379  | 4.364936  | 0.210579  |
| O | 1.688607  | -3.418774 | -0.766779 |
| C | 1.251961  | -4.648797 | -0.217212 |
| H | 0.947132  | -4.534064 | 0.828830  |

|    |            |           |           |
|----|------------|-----------|-----------|
| H  | 0.389657   | -4.952758 | -0.811824 |
| H  | 2.036713   | -5.411721 | -0.290072 |
| H  | 1.286546   | 3.137427  | 3.390600  |
| H  | 0.243056   | -3.307695 | 3.210436  |
| H  | -1.914529  | -4.350740 | 1.870495  |
| H  | -2.042681  | -2.088339 | -2.538799 |
| O  | -3.191133  | -4.298715 | -2.506195 |
| C  | -3.868984  | -5.541683 | -2.414500 |
| H  | -4.294860  | -5.720999 | -3.403174 |
| H  | -3.178911  | -6.355663 | -2.163281 |
| H  | -4.677791  | -5.500257 | -1.675370 |
| H  | 3.850165   | -0.296928 | 3.797837  |
| H  | 5.765201   | 3.549729  | -3.010948 |
| C  | 7.511820   | 1.498248  | -3.317191 |
| C  | 8.290522   | 0.372555  | -3.404191 |
| C  | 6.755483   | -0.840943 | -1.980596 |
| C  | 7.904146   | -0.810295 | -2.730939 |
| H  | 9.203760   | 0.383530  | -3.992685 |
| H  | 7.795988   | 2.409532  | -3.837759 |
| H  | 8.520454   | -1.701234 | -2.812333 |
| H  | 6.467813   | -1.757240 | -1.474667 |
| H  | -1.838720  | 0.339920  | 0.158052  |
| C  | -6.156715  | -0.787038 | 0.110597  |
| C  | -7.524649  | -0.882573 | 0.337913  |
| C  | -8.309836  | 0.239616  | 0.121090  |
| C  | -7.759417  | 1.427090  | -0.334647 |
| C  | -6.386715  | 1.480083  | -0.545218 |
| C  | -5.527972  | 0.396623  | -0.310263 |
| H  | -7.963998  | -1.816327 | 0.669179  |
| H  | -8.379884  | 2.293491  | -0.531379 |
| Cl | -5.759805  | 2.980725  | -1.178086 |
| Cl | -10.028471 | 0.148454  | 0.403355  |
| Cl | -5.235578  | -2.256477 | 0.329790  |
| C  | -4.029446  | 0.482333  | -0.536790 |
| H  | -3.801842  | 1.171078  | -1.350379 |
| H  | -3.654301  | -0.500050 | -0.828175 |
| N  | -2.982921  | 2.178895  | 0.926895  |
| C  | -3.268072  | 0.905485  | 0.712377  |
| C  | -3.362312  | 0.078336  | 1.961449  |
| H  | -4.374133  | 0.153406  | 2.376200  |
| H  | -3.160061  | -0.966459 | 1.725412  |
| H  | -2.646441  | 0.415857  | 2.715509  |
| O  | -2.655037  | 2.981513  | -0.130895 |
| C  | -2.367478  | 4.370327  | 0.260226  |

|   |           |          |           |
|---|-----------|----------|-----------|
| C | -1.158508 | 4.408467 | 1.196842  |
| H | -0.788297 | 5.436513 | 1.259244  |
| H | -1.405127 | 4.104132 | 2.221030  |
| H | -0.348864 | 3.775927 | 0.822435  |
| C | -2.046401 | 5.008842 | -1.083264 |
| H | -2.884369 | 4.890457 | -1.777649 |
| H | -1.863240 | 6.078417 | -0.943324 |
| H | -1.153326 | 4.562365 | -1.531699 |
| C | -3.589856 | 5.008077 | 0.908590  |
| H | -3.336730 | 6.025258 | 1.225061  |
| H | -4.426254 | 5.065239 | 0.207954  |
| H | -3.913656 | 4.454943 | 1.796951  |
| H | -2.496440 | 2.413005 | 1.789583  |

# TSA7f-1R

|    | Coordinates (Angstroms) |           |           |
|----|-------------------------|-----------|-----------|
|    | X                       | Y         | Z         |
| Ir | 0.203440                | 0.352760  | 0.458771  |
| C  | 1.027803                | -0.700694 | 1.964249  |
| N  | -0.038746               | -1.618578 | -0.191266 |
| C  | 1.593159                | -0.195335 | 3.133269  |
| C  | 2.166521                | -1.043485 | 4.087679  |
| C  | 2.196614                | -2.431480 | 3.894684  |
| C  | 1.628042                | -2.951796 | 2.740790  |
| C  | 1.042334                | -2.111608 | 1.789740  |
| C  | 0.237133                | -4.034675 | 0.272378  |
| C  | 0.400863                | -2.577239 | 0.576171  |
| C  | -0.766863               | -1.843707 | -1.393065 |
| C  | -0.397446               | -1.168725 | -2.562385 |
| C  | -1.167936               | -1.284420 | -3.706657 |
| C  | -2.334587               | -2.061367 | -3.700261 |
| C  | -2.704991               | -2.741772 | -2.541236 |
| C  | -1.916438               | -2.625418 | -1.398297 |
| O  | -3.043152               | -2.079896 | -4.861176 |
| C  | -4.286007               | -2.762971 | -4.866717 |
| H  | 2.646679                | -3.098089 | 4.621040  |
| H  | 0.100855                | -4.222481 | -0.794623 |
| H  | 1.097937                | -4.606447 | 0.625909  |
| H  | 0.475417                | -0.522529 | -2.562590 |
| H  | -2.232401               | -3.117581 | -0.486748 |
| H  | -4.707746               | -2.610137 | -5.861668 |

|   |           |           |           |
|---|-----------|-----------|-----------|
| H | -4.152200 | -3.837345 | -4.692589 |
| H | -4.970510 | -2.351156 | -4.114842 |
| C | -0.613690 | 2.004921  | 1.625941  |
| C | 0.059557  | 2.547041  | 0.496768  |
| C | -0.692707 | 2.175507  | -0.680703 |
| C | -1.778643 | 1.379590  | -0.278048 |
| C | -1.738624 | 1.230576  | 1.165047  |
| C | -2.801862 | 0.657672  | 2.068518  |
| C | -2.833040 | 0.831928  | -1.198690 |
| C | -3.417034 | -0.642389 | 1.597875  |
| C | -4.190728 | 1.334496  | -0.770614 |
| C | -4.645604 | 2.605364  | -1.238551 |
| C | -5.859492 | 3.108439  | -0.845051 |
| C | -6.672264 | 2.376378  | 0.062749  |
| C | -6.221791 | 1.126252  | 0.567442  |
| C | -4.955897 | 0.622240  | 0.122205  |
| C | -2.950592 | -1.877028 | 2.151770  |
| C | -3.498279 | -3.077244 | 1.771205  |
| C | -4.509640 | -3.117581 | 0.775053  |
| C | -4.984058 | -1.906021 | 0.206699  |
| C | -4.434200 | -0.666323 | 0.668992  |
| C | -5.028683 | -4.351538 | 0.301528  |
| C | -5.973829 | -4.381220 | -0.694466 |
| C | -6.446021 | -3.175433 | -1.261947 |
| C | -5.962064 | -1.967690 | -0.820277 |
| H | -0.333342 | 2.147551  | 2.661520  |
| H | 0.931544  | 3.185482  | 0.532700  |
| H | -0.470166 | 2.441358  | -1.703895 |
| H | -2.361802 | 0.516313  | 3.057925  |
| H | -3.594720 | 1.408521  | 2.176217  |
| H | -2.610737 | 1.140762  | -2.222020 |
| H | -2.826433 | -0.258811 | -1.176349 |
| H | -3.158326 | -4.013449 | 2.200140  |
| H | -4.657056 | -5.276254 | 0.736593  |
| H | -6.360109 | -5.332017 | -1.051538 |
| H | -7.193001 | -3.205605 | -2.050186 |
| H | -6.322616 | -1.046570 | -1.267657 |
| O | -3.778795 | 3.237214  | -2.071653 |
| C | -4.128663 | 4.522336  | -2.555770 |
| H | -4.248283 | 5.237863  | -1.733424 |
| H | -3.297929 | 4.836358  | -3.190094 |
| H | -5.047916 | 4.487329  | -3.152812 |
| O | -1.967882 | -1.752541 | 3.076727  |
| C | -1.585659 | -2.905768 | 3.805191  |

|    |           |           |           |
|----|-----------|-----------|-----------|
| H  | -1.147425 | -3.667707 | 3.151056  |
| H  | -0.833431 | -2.571038 | 4.520142  |
| H  | -2.443169 | -3.330143 | 4.341800  |
| H  | -0.893189 | -0.756913 | -4.615337 |
| H  | -0.646260 | -4.422311 | 0.794976  |
| H  | 1.643818  | -4.028553 | 2.596635  |
| H  | 1.638064  | 0.872825  | 3.322476  |
| O  | 2.686139  | -0.421571 | 5.177884  |
| C  | 3.276166  | -1.213007 | 6.195685  |
| H  | 3.604377  | -0.510956 | 6.964025  |
| H  | 2.551461  | -1.912133 | 6.630026  |
| H  | 4.144255  | -1.766823 | 5.818862  |
| H  | -3.606988 | -3.341792 | -2.495442 |
| H  | -6.218395 | 4.068482  | -1.200464 |
| C  | -7.927808 | 2.880548  | 0.494296  |
| C  | -8.696526 | 2.181157  | 1.391560  |
| C  | -7.033050 | 0.432322  | 1.503537  |
| C  | -8.241933 | 0.945558  | 1.905309  |
| H  | -9.654480 | 2.579693  | 1.714576  |
| H  | -8.270690 | 3.835205  | 0.102163  |
| H  | -8.851518 | 0.401873  | 2.621595  |
| H  | -6.688435 | -0.513922 | 1.909313  |
| H  | 1.756315  | 0.248050  | -0.225755 |
| C  | 5.972973  | -0.588274 | -1.739166 |
| C  | 7.152021  | -1.300500 | -1.560175 |
| C  | 7.063871  | -2.639854 | -1.212252 |
| C  | 5.836293  | -3.263360 | -1.058974 |
| C  | 4.683228  | -2.509089 | -1.245453 |
| C  | 4.695305  | -1.146207 | -1.575707 |
| H  | 8.113061  | -0.817751 | -1.694831 |
| H  | 5.770462  | -4.314785 | -0.804683 |
| Cl | 3.172640  | -3.368713 | -1.077685 |
| Cl | 8.526507  | -3.561954 | -0.980290 |
| Cl | 6.142968  | 1.084889  | -2.207700 |
| C  | 3.424114  | -0.346923 | -1.771408 |
| H  | 2.573422  | -1.025260 | -1.804253 |
| H  | 3.451933  | 0.163493  | -2.737823 |
| N  | 2.997342  | 1.960353  | -1.113026 |
| C  | 3.187856  | 0.713846  | -0.688717 |
| C  | 3.878179  | 0.594683  | 0.642283  |
| H  | 3.807057  | -0.431909 | 1.006881  |
| H  | 4.936609  | 0.856275  | 0.536513  |
| H  | 3.410622  | 1.255674  | 1.374273  |
| O  | 2.171983  | 2.079779  | -2.207222 |

|   |          |          |           |
|---|----------|----------|-----------|
| C | 2.358919 | 3.295016 | -3.005078 |
| C | 1.556194 | 2.967193 | -4.258064 |
| H | 1.578613 | 3.816393 | -4.948208 |
| H | 1.973958 | 2.093476 | -4.769594 |
| H | 0.509945 | 2.757648 | -4.008610 |
| C | 1.769335 | 4.494624 | -2.267862 |
| H | 2.298207 | 4.700717 | -1.332558 |
| H | 1.854991 | 5.385207 | -2.899864 |
| H | 0.709186 | 4.339409 | -2.045738 |
| C | 3.831788 | 3.507124 | -3.322290 |
| H | 3.936325 | 4.371130 | -3.986854 |
| H | 4.408010 | 3.709728 | -2.413638 |
| H | 4.252077 | 2.632344 | -3.827335 |
| H | 2.925425 | 2.721963 | -0.419233 |
| S | 3.259642 | 4.128273 | 2.193796  |
| C | 4.918259 | 3.722705 | 2.703245  |
| H | 5.610695 | 4.463034 | 2.294800  |
| H | 4.965777 | 3.732586 | 3.794949  |
| H | 5.176500 | 2.728498 | 2.330572  |
| O | 2.385762 | 3.075208 | 2.759928  |
| O | 3.286881 | 4.088375 | 0.699164  |
| O | 2.976701 | 5.481164 | 2.712612  |

# TSA7f-1S

| Coordinates (Angstroms) |           |           |           |
|-------------------------|-----------|-----------|-----------|
|                         | X         | Y         | Z         |
| Ir                      | 0.071197  | -0.695928 | -0.199577 |
| C                       | -0.918525 | -0.930065 | 1.536678  |
| N                       | 0.203399  | 1.206529  | 0.637110  |
| C                       | -1.526153 | -2.094264 | 1.998279  |
| C                       | -2.219902 | -2.110946 | 3.211860  |
| C                       | -2.320755 | -0.957093 | 4.001833  |
| C                       | -1.721058 | 0.210434  | 3.552659  |
| C                       | -1.025579 | 0.235321  | 2.340669  |
| C                       | -0.367200 | 2.727456  | 2.500690  |
| C                       | -0.372823 | 1.407484  | 1.793115  |
| C                       | 0.955982  | 2.212493  | -0.033953 |
| C                       | 0.697500  | 2.492597  | -1.372948 |
| C                       | 1.485522  | 3.396132  | -2.080256 |
| C                       | 2.562803  | 4.018990  | -1.444684 |
| C                       | 2.827896  | 3.740867  | -0.100111 |

|   |           |           |           |
|---|-----------|-----------|-----------|
| C | 2.030617  | 2.846226  | 0.595436  |
| O | 3.408398  | 4.896863  | -2.046129 |
| C | 3.200338  | 5.194023  | -3.417028 |
| H | -2.855806 | -0.958984 | 4.944270  |
| H | -0.286035 | 3.561390  | 1.799887  |
| H | -1.276374 | 2.856951  | 3.090103  |
| H | -0.113732 | 1.982480  | -1.881867 |
| H | 2.265501  | 2.609379  | 1.626044  |
| H | 3.985391  | 5.900344  | -3.691726 |
| H | 3.289136  | 4.293850  | -4.037324 |
| H | 2.221257  | 5.660491  | -3.580066 |
| C | 0.944254  | -2.695581 | -0.359796 |
| C | 0.349654  | -2.374023 | -1.608390 |
| C | 1.103542  | -1.285314 | -2.186864 |
| C | 2.114349  | -0.916639 | -1.280480 |
| C | 2.024471  | -1.777348 | -0.113139 |
| C | 3.025966  | -1.926652 | 1.002854  |
| C | 3.142979  | 0.154766  | -1.509526 |
| C | 3.560178  | -0.632547 | 1.574810  |
| C | 4.530894  | -0.433265 | -1.452737 |
| C | 5.100930  | -0.992891 | -2.628508 |
| C | 6.346476  | -1.557159 | -2.620007 |
| C | 7.090575  | -1.620013 | -1.414006 |
| C | 6.526431  | -1.096823 | -0.215866 |
| C | 5.226672  | -0.497356 | -0.263050 |
| C | 2.982144  | -0.115528 | 2.778334  |
| C | 3.459338  | 1.034113  | 3.357332  |
| C | 4.505761  | 1.765158  | 2.733829  |
| C | 5.080271  | 1.282310  | 1.528153  |
| C | 4.603200  | 0.045382  | 0.982590  |
| C | 4.962595  | 2.997701  | 3.270434  |
| C | 5.940592  | 3.722419  | 2.634330  |
| C | 6.507148  | 3.246797  | 1.430029  |
| C | 6.086329  | 2.055335  | 0.891629  |
| H | 0.637254  | -3.495799 | 0.301632  |
| H | -0.458840 | -2.914347 | -2.080672 |
| H | 0.924777  | -0.821759 | -3.148542 |
| H | 2.561157  | -2.511636 | 1.799367  |
| H | 3.865293  | -2.520483 | 0.620043  |
| H | 2.957121  | 0.622918  | -2.477834 |
| H | 3.051127  | 0.931569  | -0.749609 |
| H | 3.038702  | 1.418750  | 4.280138  |
| H | 4.516858  | 3.364728  | 4.192002  |
| H | 6.279056  | 4.665850  | 3.053980  |

|    |           |           |           |
|----|-----------|-----------|-----------|
| H  | 7.274419  | 3.829011  | 0.927616  |
| H  | 6.519973  | 1.702618  | -0.038859 |
| O  | 4.339096  | -0.993793 | -3.776527 |
| C  | 4.662835  | 0.038505  | -4.701600 |
| H  | 5.682526  | -0.080080 | -5.088381 |
| H  | 3.948358  | -0.048777 | -5.523241 |
| H  | 4.566500  | 1.029425  | -4.238990 |
| O  | 1.969278  | -0.859479 | 3.285922  |
| C  | 1.458341  | -0.519408 | 4.562237  |
| H  | 0.996954  | 0.474087  | 4.559321  |
| H  | 0.696842  | -1.267692 | 4.785552  |
| H  | 2.248545  | -0.556526 | 5.321963  |
| H  | 1.257323  | 3.588661  | -3.122389 |
| H  | 0.480405  | 2.780659  | 3.194282  |
| H  | -1.798708 | 1.101887  | 4.169017  |
| H  | -1.520397 | -3.005025 | 1.407739  |
| O  | -2.790247 | -3.299663 | 3.538800  |
| C  | -3.637877 | -3.356391 | 4.674466  |
| H  | -4.035384 | -4.372509 | 4.697046  |
| H  | -3.081398 | -3.166852 | 5.599936  |
| H  | -4.467055 | -2.644123 | 4.589124  |
| H  | 3.676647  | 4.217693  | 0.381822  |
| H  | 6.756771  | -1.977756 | -3.534335 |
| C  | 8.380961  | -2.212915 | -1.372558 |
| C  | 9.080050  | -2.290721 | -0.195056 |
| C  | 7.272561  | -1.203695 | 0.989703  |
| C  | 8.516409  | -1.783506 | 0.999153  |
| H  | 10.065363 | -2.747700 | -0.173974 |
| H  | 8.803496  | -2.608593 | -2.292927 |
| H  | 9.071147  | -1.857869 | 1.930305  |
| H  | 6.847791  | -0.822617 | 1.913206  |
| H  | -1.467164 | -0.168545 | -0.727570 |
| C  | -5.123223 | 2.332679  | -1.927392 |
| C  | -6.427356 | 2.807271  | -1.846472 |
| C  | -6.945702 | 3.094393  | -0.594230 |
| C  | -6.173370 | 2.961369  | 0.549119  |
| C  | -4.876226 | 2.478336  | 0.420028  |
| C  | -4.313698 | 2.091505  | -0.807841 |
| H  | -7.014241 | 2.959718  | -2.744565 |
| H  | -6.566196 | 3.232160  | 1.522143  |
| Cl | -3.939497 | 2.424137  | 1.891565  |
| Cl | -8.586550 | 3.671350  | -0.456794 |
| Cl | -4.493632 | 2.109010  | -3.543207 |
| C  | -2.916546 | 1.512575  | -0.903411 |

|   |           |           |           |
|---|-----------|-----------|-----------|
| H | -2.423654 | 1.638976  | 0.059270  |
| H | -2.327636 | 2.075778  | -1.631765 |
| N | -3.672940 | -0.824441 | -0.733993 |
| C | -2.822761 | 0.030207  | -1.297376 |
| C | -2.467327 | -0.358949 | -2.720236 |
| H | -3.358621 | -0.322677 | -3.350625 |
| H | -1.718394 | 0.330031  | -3.114397 |
| H | -2.071739 | -1.374090 | -2.754702 |
| O | -4.099935 | -0.579646 | 0.551721  |
| C | -5.379809 | -1.230238 | 0.848799  |
| C | -5.172302 | -2.737910 | 0.991552  |
| H | -6.107661 | -3.196839 | 1.330723  |
| H | -4.904429 | -3.205637 | 0.040534  |
| H | -4.394687 | -2.960446 | 1.727918  |
| C | -5.772252 | -0.618193 | 2.186302  |
| H | -6.039360 | 0.436587  | 2.078253  |
| H | -6.638996 | -1.150507 | 2.590742  |
| H | -4.948822 | -0.699786 | 2.903398  |
| C | -6.406237 | -0.911548 | -0.233281 |
| H | -7.379233 | -1.316851 | 0.064233  |
| H | -6.513429 | 0.168933  | -0.370292 |
| H | -6.134208 | -1.363021 | -1.192833 |
| H | -3.662137 | -1.812777 | -1.028095 |
| S | -2.899160 | -4.342149 | -1.933010 |
| C | -3.796843 | -5.881317 | -1.961560 |
| H | -4.311029 | -5.979999 | -2.920600 |
| H | -3.089416 | -6.703745 | -1.831102 |
| H | -4.523993 | -5.882649 | -1.145865 |
| O | -2.232875 | -4.268707 | -0.614439 |
| O | -3.930598 | -3.274336 | -2.099574 |
| O | -1.954297 | -4.383209 | -3.072087 |

### TSB2-3

|    | Coordinates (Angstroms) |           |           |
|----|-------------------------|-----------|-----------|
|    | X                       | Y         | Z         |
| Ir | 1.649211                | -0.023833 | -0.310411 |
| C  | 2.529474                | 1.799178  | -0.524273 |
| N  | 0.903675                | 1.032745  | 1.333374  |
| C  | 3.450625                | 2.197803  | -1.502880 |
| C  | 4.003588                | 3.477516  | -1.480910 |
| C  | 3.689675                | 4.376414  | -0.456648 |

|   |           |           |           |
|---|-----------|-----------|-----------|
| C | 2.807878  | 4.017912  | 0.551920  |
| C | 2.236867  | 2.733622  | 0.484949  |
| C | 0.938812  | 3.153118  | 2.642063  |
| C | 1.315476  | 2.255581  | 1.499604  |
| C | -0.018210 | 0.410008  | 2.226344  |
| C | 0.311002  | -0.822098 | 2.783524  |
| C | -0.587816 | -1.495021 | 3.609484  |
| C | -1.826025 | -0.895331 | 3.863826  |
| C | -2.182018 | 0.336709  | 3.304592  |
| C | -1.267762 | 0.977981  | 2.470122  |
| O | -2.760770 | -1.544499 | 4.645729  |
| C | -2.577018 | -1.357734 | 6.044480  |
| H | 4.154562  | 5.359136  | -0.450471 |
| H | 0.688218  | 2.563287  | 3.528405  |
| H | 1.271531  | -1.275363 | 2.561061  |
| H | -1.539334 | 1.912746  | 1.988713  |
| H | -3.417763 | -1.850418 | 6.538340  |
| H | -1.639923 | -1.810007 | 6.391329  |
| H | -2.575643 | -0.291665 | 6.304229  |
| C | 1.353983  | -0.508258 | -2.433077 |
| C | 1.935945  | -1.634439 | -1.795830 |
| C | 0.963676  | -2.156387 | -0.858869 |
| C | -0.168714 | -1.321526 | -0.882703 |
| C | 0.067537  | -0.255498 | -1.841229 |
| C | -0.944686 | 0.696777  | -2.417020 |
| C | -1.429597 | -1.515671 | -0.087754 |
| C | -1.885971 | 1.349491  | -1.431858 |
| C | -2.595299 | -1.717156 | -1.026024 |
| C | -2.865814 | -3.027777 | -1.507357 |
| C | -3.885754 | -3.271755 | -2.384429 |
| C | -4.678151 | -2.200475 | -2.868445 |
| C | -4.403839 | -0.873437 | -2.431127 |
| C | -3.351950 | -0.654332 | -1.481404 |
| C | -1.588643 | 2.673512  | -0.980729 |
| C | -2.468078 | 3.366576  | -0.187609 |
| C | -3.678426 | 2.755059  | 0.233335  |
| C | -3.960998 | 1.413507  | -0.140982 |
| C | -3.044299 | 0.732427  | -1.010746 |
| C | -4.619166 | 3.465801  | 1.024858  |
| C | -5.785000 | 2.869435  | 1.437087  |
| C | -6.051735 | 1.524597  | 1.095502  |
| C | -5.158465 | 0.813604  | 0.331393  |
| H | 1.810088  | 0.094444  | -3.204875 |
| H | 2.909975  | -2.053792 | -2.002547 |

|   |           |           |           |
|---|-----------|-----------|-----------|
| H | 1.090099  | -3.021524 | -0.220964 |
| H | -0.405929 | 1.470977  | -2.968143 |
| H | -1.537143 | 0.137384  | -3.151496 |
| H | -1.302767 | -2.376200 | 0.571632  |
| H | -1.615330 | -0.644046 | 0.540708  |
| H | -2.269976 | 4.386940  | 0.122676  |
| H | -4.401383 | 4.496537  | 1.294382  |
| H | -6.499369 | 3.426428  | 2.037054  |
| H | -6.964475 | 1.050197  | 1.444442  |
| H | -5.368786 | -0.221772 | 0.082236  |
| H | 0.029016  | 3.700989  | 2.357039  |
| H | -4.071109 | -4.284944 | -2.731170 |
| C | -5.724355 | -2.424587 | -3.803366 |
| C | -6.461272 | -1.378337 | -4.295915 |
| C | -5.175004 | 0.189956  | -2.976371 |
| C | -6.176713 | -0.056098 | -3.881641 |
| H | -7.258256 | -1.559627 | -5.011666 |
| H | -5.926465 | -3.443612 | -4.124049 |
| H | -6.753280 | 0.770471  | -4.287380 |
| H | -4.962371 | 1.211193  | -2.677272 |
| C | -3.535486 | 0.926032  | 3.587209  |
| H | -4.335466 | 0.246734  | 3.274841  |
| H | -3.673517 | 1.110871  | 4.659247  |
| H | -3.663766 | 1.875355  | 3.061709  |
| C | -0.231361 | -2.837841 | 4.189602  |
| H | 0.273357  | -2.731490 | 5.158036  |
| H | -1.123920 | -3.450647 | 4.347466  |
| H | 0.449915  | -3.375958 | 3.523310  |
| C | 2.447280  | 4.941368  | 1.689825  |
| C | 2.058498  | 4.154753  | 2.941436  |
| H | 3.284950  | 5.613163  | 1.906749  |
| H | 1.603798  | 5.581307  | 1.389991  |
| H | 2.934863  | 3.617390  | 3.325379  |
| H | 1.725542  | 4.838121  | 3.729362  |
| H | 4.701021  | 3.782486  | -2.255923 |
| O | 3.772130  | 1.278008  | -2.462308 |
| C | 5.064963  | 1.313567  | -3.043881 |
| H | 5.805769  | 1.637264  | -2.302006 |
| H | 5.093924  | 2.004580  | -3.896388 |
| C | 5.383981  | -0.087363 | -3.511460 |
| H | 6.352475  | -0.075528 | -4.035284 |
| H | 4.619008  | -0.434569 | -4.223758 |
| O | 5.430815  | -0.935893 | -2.385723 |
| C | 5.769611  | -2.264192 | -2.720011 |

|   |           |           |           |
|---|-----------|-----------|-----------|
| H | 5.737480  | -2.846222 | -1.796496 |
| H | 5.056134  | -2.693414 | -3.439504 |
| H | 6.779943  | -2.324652 | -3.152750 |
| H | 3.083338  | -0.114735 | 0.594322  |
| S | 3.564343  | -3.283501 | 1.494915  |
| C | 4.864726  | -3.932645 | 2.516261  |
| H | 5.044648  | -4.970605 | 2.225373  |
| H | 5.767423  | -3.337538 | 2.362435  |
| H | 4.553983  | -3.886051 | 3.562407  |
| O | 3.392860  | -1.859500 | 2.010184  |
| H | 2.978192  | -0.936679 | 1.077266  |
| O | 2.357570  | -4.092533 | 1.744337  |
| O | 4.032195  | -3.294691 | 0.099879  |
| O | -2.038542 | -4.048698 | -1.094499 |
| C | -2.576735 | -4.851606 | -0.048823 |
| H | -3.479635 | -5.378841 | -0.380919 |
| H | -1.805138 | -5.578382 | 0.212868  |
| H | -2.819697 | -4.244001 | 0.832514  |
| O | -0.411498 | 3.172468  | -1.430181 |
| C | -0.106015 | 4.526067  | -1.147795 |
| H | -0.858326 | 5.196436  | -1.581327 |
| H | -0.035681 | 4.703697  | -0.068906 |
| H | 0.863322  | 4.715926  | -1.609664 |

# TSB5-6uR

| Coordinates (Angstroms) |           |           |           |
|-------------------------|-----------|-----------|-----------|
|                         | X         | Y         | Z         |
| Ir                      | -0.129798 | 0.867465  | -0.460353 |
| C                       | -1.013423 | 0.471278  | -2.228271 |
| N                       | -0.038658 | -1.214661 | -0.553108 |
| C                       | -1.606297 | 1.387156  | -3.117827 |
| C                       | -2.229429 | 0.951100  | -4.283908 |
| C                       | -2.311124 | -0.416466 | -4.584779 |
| C                       | -1.772667 | -1.361130 | -3.728286 |
| C                       | -1.126763 | -0.890616 | -2.568300 |
| C                       | -0.672709 | -3.283260 | -1.791224 |
| C                       | -0.567363 | -1.799827 | -1.589441 |
| C                       | 0.525981  | -1.938474 | 0.534252  |
| C                       | 0.060339  | -1.670599 | 1.818864  |
| C                       | 0.622750  | -2.286112 | 2.933144  |
| C                       | 1.673421  | -3.187408 | 2.723359  |

|   |           |           |           |
|---|-----------|-----------|-----------|
| C | 2.163782  | -3.468192 | 1.443223  |
| C | 1.583692  | -2.825120 | 0.349140  |
| O | 2.300804  | -3.772817 | 3.803790  |
| C | 1.644790  | -4.930593 | 4.307942  |
| H | -2.819207 | -0.729120 | -5.493791 |
| H | -0.723528 | -3.796521 | -0.826208 |
| H | -0.730536 | -0.939961 | 1.947798  |
| H | 1.980414  | -2.992226 | -0.647877 |
| H | 2.264611  | -5.309072 | 5.123687  |
| H | 0.646587  | -4.691491 | 4.694281  |
| H | 1.552483  | -5.702472 | 3.533713  |
| C | 0.827054  | 2.804958  | -0.879222 |
| C | 0.041176  | 2.917978  | 0.304920  |
| C | 0.670598  | 2.096795  | 1.317848  |
| C | 1.782403  | 1.447790  | 0.734548  |
| C | 1.897993  | 1.883541  | -0.642290 |
| C | 3.018906  | 1.617144  | -1.610130 |
| C | 2.718885  | 0.498762  | 1.436540  |
| C | 3.505263  | 0.185986  | -1.654728 |
| C | 4.142065  | 0.998600  | 1.345634  |
| C | 4.618438  | 1.913057  | 2.325081  |
| C | 5.878244  | 2.440870  | 2.262414  |
| C | 6.739508  | 2.101523  | 1.188427  |
| C | 6.281168  | 1.202152  | 0.185020  |
| C | 4.964174  | 0.647708  | 0.292241  |
| C | 2.999507  | -0.694480 | -2.663316 |
| C | 3.488854  | -1.970077 | -2.798150 |
| C | 4.490810  | -2.447558 | -1.911614 |
| C | 4.960833  | -1.612666 | -0.862579 |
| C | 4.453879  | -0.274441 | -0.768294 |
| C | 5.041608  | -3.748340 | -2.058516 |
| C | 6.012659  | -4.202402 | -1.200229 |
| C | 6.460290  | -3.383675 | -0.139051 |
| C | 5.939872  | -2.123687 | 0.029848  |
| H | 0.648732  | 3.321610  | -1.811717 |
| H | -0.815149 | 3.564178  | 0.440582  |
| H | 0.340028  | 1.974900  | 2.341211  |
| H | 2.683846  | 1.918788  | -2.605137 |
| H | 3.862320  | 2.268896  | -1.349740 |
| H | 2.407792  | 0.403674  | 2.478796  |
| H | 2.651822  | -0.493479 | 0.985702  |
| H | 3.137519  | -2.632102 | -3.582439 |
| H | 4.684976  | -4.378045 | -2.870209 |
| H | 6.433807  | -5.195686 | -1.329544 |

|   |           |           |           |
|---|-----------|-----------|-----------|
| H | 7.214305  | -3.755367 | 0.549000  |
| H | 6.285965  | -1.504885 | 0.851919  |
| O | 3.757200  | 2.290820  | 3.333910  |
| C | 3.942480  | 1.570032  | 4.548263  |
| H | 4.945881  | 1.738117  | 4.958543  |
| H | 3.195722  | 1.944186  | 5.252092  |
| H | 3.793782  | 0.492968  | 4.396462  |
| O | 2.048360  | -0.155777 | -3.465105 |
| C | 1.571892  | -0.923063 | -4.555993 |
| H | 1.106625  | -1.854947 | -4.216261 |
| H | 0.821152  | -0.304116 | -5.049162 |
| H | 2.382838  | -1.151874 | -5.258302 |
| H | 0.246941  | -3.629407 | -2.283721 |
| H | 6.210640  | 3.138624  | 3.026493  |
| C | 8.042223  | 2.658536  | 1.082500  |
| C | 8.855321  | 2.344328  | 0.023683  |
| C | 7.145302  | 0.906918  | -0.905133 |
| C | 8.398194  | 1.461172  | -0.982320 |
| H | 9.848596  | 2.778247  | -0.050105 |
| H | 8.380371  | 3.344156  | 1.855572  |
| H | 9.043713  | 1.223606  | -1.823337 |
| H | 6.805238  | 0.236963  | -1.688237 |
| C | 3.316573  | -4.417648 | 1.271184  |
| H | 4.216897  | -4.036604 | 1.764855  |
| H | 3.098111  | -5.397084 | 1.711520  |
| H | 3.543893  | -4.564385 | 0.212275  |
| C | 0.130519  | -1.962668 | 4.318112  |
| H | -0.640178 | -2.671204 | 4.645868  |
| H | 0.944568  | -2.002902 | 5.048518  |
| H | -0.310342 | -0.960585 | 4.347435  |
| C | -1.858277 | -2.846695 | -3.980481 |
| C | -1.879582 | -3.631826 | -2.668005 |
| H | -2.750009 | -3.075166 | -4.574815 |
| H | -0.991510 | -3.169276 | -4.577105 |
| H | -2.804579 | -3.406855 | -2.120977 |
| H | -1.877711 | -4.707756 | -2.869985 |
| H | -2.674881 | 1.663615  | -4.971473 |
| O | -1.541669 | 2.701423  | -2.750675 |
| C | -2.388641 | 3.641796  | -3.381004 |
| H | -3.428063 | 3.286165  | -3.370760 |
| H | -2.086964 | 3.815875  | -4.422468 |
| C | -2.269849 | 4.934301  | -2.609242 |
| H | -2.856028 | 5.711966  | -3.122703 |
| H | -1.219260 | 5.262975  | -2.585085 |

|    |           |           |           |
|----|-----------|-----------|-----------|
| O  | -2.751801 | 4.730772  | -1.298512 |
| C  | -2.683287 | 5.898901  | -0.511609 |
| H  | -3.107992 | 5.658334  | 0.466344  |
| H  | -1.645012 | 6.237127  | -0.379046 |
| H  | -3.263639 | 6.719491  | -0.959538 |
| H  | -1.652534 | 0.594638  | 0.061820  |
| C  | -5.586859 | -1.582409 | 1.600376  |
| C  | -6.945626 | -1.865833 | 1.657225  |
| C  | -7.675320 | -1.812125 | 0.479004  |
| C  | -7.072991 | -1.505807 | -0.731832 |
| C  | -5.711475 | -1.228431 | -0.743860 |
| C  | -4.920903 | -1.236913 | 0.415881  |
| H  | -7.418356 | -2.124145 | 2.597794  |
| H  | -7.646495 | -1.485470 | -1.651097 |
| Cl | -4.996630 | -0.896453 | -2.303023 |
| Cl | -9.384296 | -2.153502 | 0.516078  |
| Cl | -4.703420 | -1.716415 | 3.106267  |
| C  | -3.446503 | -0.891290 | 0.389179  |
| H  | -3.043819 | -1.068968 | -0.609606 |
| H  | -2.881337 | -1.523827 | 1.078186  |
| N  | -2.981467 | 0.865939  | 1.972903  |
| C  | -3.210563 | 0.572560  | 0.708417  |
| C  | -3.743294 | 1.630087  | -0.202376 |
| H  | -3.557799 | 1.353914  | -1.239718 |
| H  | -4.827934 | 1.694403  | -0.043040 |
| H  | -3.293866 | 2.600080  | -0.000350 |
| O  | -2.594822 | 2.135736  | 2.288320  |
| C  | -3.372367 | 2.741353  | 3.380718  |
| C  | -4.827264 | 2.871780  | 2.953159  |
| H  | -4.912200 | 3.473938  | 2.042873  |
| H  | -5.280369 | 1.890305  | 2.775277  |
| H  | -5.398351 | 3.363830  | 3.747280  |
| C  | -2.698244 | 4.097384  | 3.523396  |
| H  | -3.185499 | 4.667482  | 4.320140  |
| H  | -1.638937 | 3.981769  | 3.776271  |
| H  | -2.777848 | 4.666704  | 2.591801  |
| C  | -3.212215 | 1.899596  | 4.640832  |
| H  | -3.727574 | 0.936695  | 4.555826  |
| H  | -2.152317 | 1.720415  | 4.853475  |
| H  | -3.649521 | 2.427807  | 5.493714  |
| H  | -2.616623 | 0.159971  | 2.608539  |

-----

**TSB5-6uS**

| ----- |                         |           |           |
|-------|-------------------------|-----------|-----------|
|       | Coordinates (Angstroms) |           |           |
|       | X                       | Y         | Z         |
| ----- |                         |           |           |
| Ir    | -0.318576               | -0.391417 | -0.378037 |
| C     | -1.146721               | -1.758923 | 0.887437  |
| N     | -0.052333               | 0.504270  | 1.478512  |
| C     | -1.693149               | -3.027516 | 0.617399  |
| C     | -2.351096               | -3.755458 | 1.608144  |
| C     | -2.441939               | -3.278650 | 2.918218  |
| C     | -1.886383               | -2.055334 | 3.256018  |
| C     | -1.250699               | -1.328461 | 2.231501  |
| C     | -0.641472               | 0.518495  | 3.894027  |
| C     | -0.612376               | -0.058031 | 2.508684  |
| C     | 0.744586                | 1.677655  | 1.606053  |
| C     | 0.444242                | 2.808805  | 0.854617  |
| C     | 1.288182                | 3.920036  | 0.877418  |
| C     | 2.426394                | 3.870308  | 1.689804  |
| C     | 2.747311                | 2.740708  | 2.451911  |
| C     | 1.896787                | 1.639914  | 2.391264  |
| O     | 3.303818                | 4.936038  | 1.711902  |
| C     | 2.917058                | 5.974248  | 2.605740  |
| H     | -2.964354               | -3.869735 | 3.666560  |
| H     | -0.602520               | 1.611398  | 3.849379  |
| H     | -0.432646               | 2.808250  | 0.213083  |
| H     | 2.151186                | 0.728822  | 2.926248  |
| H     | 3.713645                | 6.721235  | 2.582623  |
| H     | 1.974652                | 6.441062  | 2.293538  |
| H     | 2.805132                | 5.592241  | 3.628363  |
| C     | 0.280216                | -1.526471 | -2.192977 |
| C     | -0.377009               | -0.325408 | -2.580780 |
| C     | 0.448061                | 0.784570  | -2.185840 |
| C     | 1.586938                | 0.258765  | -1.517077 |
| C     | 1.507108                | -1.179842 | -1.528937 |
| C     | 2.577404                | -2.161682 | -1.137891 |
| C     | 2.714372                | 1.084761  | -0.958350 |
| C     | 3.282175                | -1.834594 | 0.157635  |
| C     | 4.024637                | 0.695904  | -1.595425 |
| C     | 4.425039                | 1.335818  | -2.799484 |
| C     | 5.580971                | 0.991201  | -3.442785 |
| C     | 6.402727                | -0.041003 | -2.922141 |
| C     | 6.017204                | -0.705687 | -1.722912 |
| C     | 4.809840                | -0.308484 | -1.064446 |
| C     | 2.801292                | -2.418444 | 1.371786  |

|   |           |           |           |
|---|-----------|-----------|-----------|
| C | 3.398292  | -2.137166 | 2.575059  |
| C | 4.520449  | -1.268258 | 2.628762  |
| C | 5.011553  | -0.672107 | 1.436189  |
| C | 4.360783  | -0.978649 | 0.195229  |
| C | 5.174040  | -0.992771 | 3.859178  |
| C | 6.269766  | -0.166467 | 3.904286  |
| C | 6.749960  | 0.439242  | 2.721367  |
| C | 6.129256  | 0.199949  | 1.519413  |
| H | -0.073674 | -2.528114 | -2.395922 |
| H | -1.313110 | -0.264683 | -3.121215 |
| H | 0.246026  | 1.834426  | -2.354553 |
| H | 2.123269  | -3.151929 | -1.070687 |
| H | 3.314636  | -2.203165 | -1.949200 |
| H | 2.495124  | 2.137883  | -1.138106 |
| H | 2.780995  | 0.948759  | 0.121732  |
| H | 3.043980  | -2.579754 | 3.499685  |
| H | 4.794999  | -1.456870 | 4.766607  |
| H | 6.766837  | 0.028074  | 4.850660  |
| H | 7.608240  | 1.103818  | 2.764910  |
| H | 6.500662  | 0.677494  | 0.618170  |
| O | 3.597622  | 2.306325  | -3.324982 |
| C | 3.973001  | 3.632118  | -2.962097 |
| H | 4.955994  | 3.887855  | -3.376256 |
| H | 3.216603  | 4.299028  | -3.382026 |
| H | 4.000791  | 3.754925  | -1.871346 |
| O | 1.751919  | -3.264071 | 1.222327  |
| C | 1.253717  | -3.916273 | 2.376951  |
| H | 0.860461  | -3.195316 | 3.102560  |
| H | 0.445850  | -4.561789 | 2.032204  |
| H | 2.031553  | -4.529263 | 2.848584  |
| H | 0.260308  | 0.189329  | 4.428616  |
| H | 5.861431  | 1.499741  | -4.361424 |
| C | 7.599379  | -0.432599 | -3.579738 |
| C | 8.378629  | -1.442277 | -3.075589 |
| C | 6.842101  | -1.754821 | -1.232729 |
| C | 7.992534  | -2.111830 | -1.890522 |
| H | 9.292099  | -1.734187 | -3.585986 |
| H | 7.885363  | 0.083091  | -4.493170 |
| H | 8.611436  | -2.915425 | -1.501395 |
| H | 6.551576  | -2.278440 | -0.327007 |
| C | 4.006479  | 2.715374  | 3.273156  |
| H | 4.890143  | 2.869838  | 2.645245  |
| H | 4.006382  | 3.510123  | 4.028380  |
| H | 4.115740  | 1.756412  | 3.786787  |

|    |            |           |           |
|----|------------|-----------|-----------|
| C  | 1.008649   | 5.116018  | 0.006748  |
| H  | 0.314011   | 5.815768  | 0.486863  |
| H  | 1.929742   | 5.662541  | -0.215429 |
| H  | 0.559889   | 4.800270  | -0.939979 |
| C  | -1.946913  | -1.494096 | 4.657212  |
| C  | -1.880659  | 0.032731  | 4.651165  |
| H  | -2.860348  | -1.836921 | 5.155613  |
| H  | -1.104082  | -1.885952 | 5.245604  |
| H  | -2.783774  | 0.440062  | 4.177975  |
| H  | -1.850772  | 0.416148  | 5.675965  |
| H  | -2.820179  | -4.704286 | 1.364936  |
| O  | -1.594924  | -3.497768 | -0.667575 |
| C  | -1.496410  | -4.899909 | -0.887106 |
| H  | -2.431305  | -5.262683 | -1.330174 |
| H  | -1.325835  | -5.437259 | 0.050872  |
| C  | -0.324007  | -5.177766 | -1.797714 |
| H  | -0.208609  | -6.266621 | -1.916844 |
| H  | 0.594074   | -4.785411 | -1.334114 |
| O  | -0.545855  | -4.564140 | -3.049573 |
| C  | 0.566554   | -4.685188 | -3.910339 |
| H  | 0.318251   | -4.162343 | -4.837467 |
| H  | 1.466035   | -4.228219 | -3.470984 |
| H  | 0.783085   | -5.739426 | -4.136923 |
| H  | -1.835540  | 0.202711  | -0.267869 |
| C  | -6.166370  | -0.748632 | 0.616002  |
| C  | -7.535632  | -0.629895 | 0.820519  |
| C  | -8.312900  | -0.102129 | -0.198958 |
| C  | -7.754114  | 0.282381  | -1.408096 |
| C  | -6.381320  | 0.144656  | -1.571964 |
| C  | -5.531798  | -0.351523 | -0.571932 |
| H  | -7.982928  | -0.948827 | 1.754546  |
| H  | -8.370120  | 0.674030  | -2.209074 |
| Cl | -5.746245  | 0.590314  | -3.141163 |
| Cl | -10.031775 | 0.064654  | 0.038081  |
| Cl | -5.246369  | -1.467830 | 1.915289  |
| C  | -4.029781  | -0.452897 | -0.755058 |
| H  | -3.778934  | -0.719031 | -1.784328 |
| H  | -3.627958  | -1.241332 | -0.117783 |
| N  | -3.232396  | 1.743208  | -1.336516 |
| C  | -3.341630  | 0.847644  | -0.371533 |
| C  | -3.360822  | 1.307814  | 1.050577  |
| H  | -4.369358  | 1.672602  | 1.283026  |
| H  | -3.134105  | 0.467159  | 1.705591  |
| H  | -2.645937  | 2.112117  | 1.221204  |

|   |           |          |           |
|---|-----------|----------|-----------|
| O | -2.602925 | 2.926944 | -1.080034 |
| C | -3.442824 | 4.106959 | -1.364918 |
| C | -3.714006 | 4.170632 | -2.862679 |
| H | -2.776717 | 4.099555 | -3.424808 |
| H | -4.387053 | 3.371005 | -3.189700 |
| H | -4.193667 | 5.123186 | -3.109215 |
| C | -2.545802 | 5.247299 | -0.911136 |
| H | -3.073119 | 6.198538 | -1.031065 |
| H | -2.277848 | 5.130644 | 0.144280  |
| H | -1.631414 | 5.284244 | -1.510706 |
| C | -4.727681 | 4.042648 | -0.550630 |
| H | -5.325333 | 3.161681 | -0.809444 |
| H | -4.514273 | 4.027039 | 0.522781  |
| H | -5.332488 | 4.929358 | -0.766547 |
| H | -3.166378 | 1.448878 | -2.307740 |

# **TSB5-1fR**

|    | Coordinates (Angstroms) |             |             |
|----|-------------------------|-------------|-------------|
|    | X                       | Y           | Z           |
| Ir | 0.04131000              | -0.77246200 | -0.20643800 |
| C  | 0.44676700              | -1.43334700 | -2.08050900 |
| N  | -0.07390400             | 0.98487100  | -1.32746900 |
| C  | 0.72039500              | -2.74365000 | -2.52032600 |
| C  | 1.13557000              | -2.98933300 | -3.82770400 |
| C  | 1.25138500              | -1.94982500 | -4.75687400 |
| C  | 0.94640700              | -0.64923400 | -4.39385700 |
| C  | 0.54614900              | -0.42326800 | -3.06172100 |
| C  | 0.30353300              | 2.07587500  | -3.53782400 |
| C  | 0.23246300              | 0.91278600  | -2.59071100 |
| C  | -0.45785100             | 2.19831300  | -0.68766200 |
| C  | 0.14090100              | 2.53315300  | 0.52452500  |
| C  | -0.24476500             | 3.66720800  | 1.23252600  |
| C  | -1.26340800             | 4.46124400  | 0.69463900  |
| C  | -1.90299700             | 4.13227000  | -0.50545900 |
| C  | -1.49400600             | 2.98627800  | -1.18754200 |
| O  | -1.70813600             | 5.56954400  | 1.38726700  |
| C  | -0.93740300             | 6.74324600  | 1.15471300  |
| H  | 1.58168800              | -2.17308700 | -5.76854800 |
| H  | 0.52277000              | 3.00131400  | -2.99708700 |
| H  | 0.88158000              | 1.86949400  | 0.95454800  |
| H  | -2.01246900             | 2.68935700  | -2.09421400 |

|   |             |             |             |
|---|-------------|-------------|-------------|
| H | -1.43674000 | 7.55643100  | 1.68662700  |
| H | 0.08435300  | 6.63503800  | 1.53878100  |
| H | -0.89303800 | 6.98261400  | 0.08489000  |
| C | -0.85043700 | -2.54271900 | 0.76554300  |
| C | 0.09782000  | -1.96207200 | 1.65069700  |
| C | -0.40093700 | -0.66599500 | 2.04651600  |
| C | -1.62154600 | -0.44455200 | 1.36747400  |
| C | -1.91690500 | -1.60270200 | 0.55206500  |
| C | -3.17689900 | -1.90722000 | -0.21833000 |
| C | -2.49509000 | 0.77183800  | 1.51831500  |
| C | -3.69984700 | -0.74906400 | -1.03945100 |
| C | -3.89564000 | 0.37145000  | 1.91405300  |
| C | -4.19958600 | 0.17473700  | 3.29579200  |
| C | -5.45685800 | -0.20131500 | 3.69541600  |
| C | -6.46938600 | -0.43492900 | 2.72588400  |
| C | -6.17639500 | -0.28493200 | 1.34281700  |
| C | -4.85811400 | 0.13072100  | 0.96127400  |
| C | -3.36437000 | -0.67477400 | -2.42891200 |
| C | -3.79310600 | 0.37192600  | -3.20660500 |
| C | -4.59831400 | 1.39679700  | -2.64328200 |
| C | -4.95402500 | 1.33885000  | -1.26940500 |
| C | -4.49261600 | 0.23182800  | -0.48459800 |
| C | -5.07126200 | 2.47727000  | -3.43428800 |
| C | -5.86864500 | 3.45260700  | -2.88754300 |
| C | -6.21198800 | 3.40330200  | -1.51729500 |
| C | -5.75788000 | 2.37576900  | -0.72670200 |
| H | -0.79506300 | -3.51516000 | 0.30216800  |
| H | 1.00562500  | -2.42803900 | 2.01017500  |
| H | 0.06707300  | 0.02070800  | 2.73648800  |
| H | -2.97065000 | -2.75815800 | -0.87112000 |
| H | -3.94980100 | -2.22651500 | 0.49148500  |
| H | -2.05656100 | 1.43534500  | 2.26613500  |
| H | -2.53580200 | 1.32663000  | 0.57948200  |
| H | -3.55004000 | 0.42915300  | -4.26202300 |
| H | -4.79904000 | 2.51328500  | -4.48667400 |
| H | -6.23106200 | 4.26966500  | -3.50555200 |
| H | -6.83102700 | 4.18588700  | -1.08781400 |
| H | -6.01673000 | 2.35043000  | 0.32756600  |
| O | -3.15101000 | 0.37957200  | 4.13257600  |
| C | -3.35276100 | 0.18576000  | 5.52133500  |
| H | -3.65734700 | -0.84549100 | 5.73637800  |
| H | -2.38793300 | 0.38078600  | 5.99195300  |
| H | -4.10093200 | 0.88398000  | 5.91563700  |
| O | -2.63467400 | -1.71606500 | -2.89574500 |

|    |             |             |             |
|----|-------------|-------------|-------------|
| C  | -2.38793100 | -1.78906500 | -4.28812000 |
| H  | -1.79665800 | -0.93532200 | -4.63617200 |
| H  | -1.82161600 | -2.70801700 | -4.44223500 |
| H  | -3.32929200 | -1.84049100 | -4.84937900 |
| H  | -0.68740600 | 2.20557800  | -3.99573000 |
| H  | -5.69975500 | -0.34484600 | 4.74300900  |
| C  | -7.77370100 | -0.84211000 | 3.11316300  |
| C  | -8.74053900 | -1.09746400 | 2.17254400  |
| C  | -7.19320800 | -0.56915000 | 0.39325800  |
| C  | -8.44567000 | -0.96329300 | 0.79696800  |
| H  | -9.73416700 | -1.40926900 | 2.48314000  |
| H  | -7.99205500 | -0.95408300 | 4.17256100  |
| H  | -9.21230300 | -1.17592800 | 0.05716200  |
| H  | -6.97469800 | -0.47519600 | -0.66600700 |
| H  | 1.68968300  | -0.45866600 | -0.24191200 |
| C  | 5.95793100  | 1.17454000  | 0.98017300  |
| C  | 7.20699900  | 1.73574300  | 0.74290400  |
| C  | 7.32462800  | 2.67457700  | -0.27032100 |
| C  | 6.22919800  | 3.06100100  | -1.02770700 |
| C  | 4.99995000  | 2.47181100  | -0.75758900 |
| C  | 4.81275900  | 1.50324700  | 0.24072300  |
| H  | 8.06247200  | 1.44994300  | 1.34409800  |
| H  | 6.32342000  | 3.80794300  | -1.80724500 |
| Cl | 3.64919000  | 3.03078700  | -1.72327400 |
| Cl | 8.88078700  | 3.39698800  | -0.58896300 |
| Cl | 5.85102200  | 0.03575300  | 2.29791300  |
| C  | 3.45925200  | 0.88392000  | 0.51435400  |
| H  | 2.69348600  | 1.54658100  | 0.11625800  |
| H  | 3.27405200  | 0.79792800  | 1.58963500  |
| N  | 3.51973000  | -1.52290400 | 0.61418600  |
| C  | 3.26978400  | -0.46903400 | -0.15696200 |
| C  | 3.52898800  | -0.56813500 | -1.62976100 |
| H  | 3.03388700  | 0.25073900  | -2.15210200 |
| H  | 4.61103600  | -0.47812600 | -1.78756000 |
| H  | 3.18637200  | -1.51700100 | -2.03842200 |
| O  | 3.18133500  | -2.74653400 | 0.08619700  |
| C  | 4.24469500  | -3.74545500 | 0.17655100  |
| C  | 4.54647100  | -4.04130600 | 1.64141800  |
| H  | 5.24209600  | -4.88425600 | 1.71200600  |
| H  | 5.01062700  | -3.18449900 | 2.14059800  |
| H  | 3.62872600  | -4.30268600 | 2.17845600  |
| C  | 3.61148400  | -4.94359800 | -0.51660400 |
| H  | 3.36307000  | -4.69683200 | -1.55392400 |
| H  | 4.31483100  | -5.78213500 | -0.51873200 |

|   |             |             |             |
|---|-------------|-------------|-------------|
| H | 2.69970300  | -5.25484900 | 0.00314900  |
| C | 5.48064700  | -3.26264600 | -0.57269500 |
| H | 6.26135900  | -4.02921100 | -0.52395900 |
| H | 5.25079600  | -3.07490800 | -1.62659700 |
| H | 5.88223700  | -2.34564900 | -0.12886500 |
| H | 3.34505900  | -1.46914600 | 1.63279700  |
| S | 2.45370100  | -0.61440700 | 4.26695400  |
| C | 3.61108100  | -0.33365100 | 5.59229000  |
| H | 3.79150800  | -1.27727200 | 6.11274300  |
| H | 4.54607000  | 0.05170000  | 5.17988900  |
| H | 3.18309400  | 0.39642000  | 6.28387700  |
| O | 1.21091500  | -1.10718200 | 4.89450000  |
| O | 3.09242900  | -1.64072600 | 3.38912500  |
| O | 2.29135500  | 0.69023000  | 3.57832900  |
| C | -3.02687000 | 4.99030500  | -1.01769700 |
| H | -3.45340300 | 4.56929700  | -1.93198800 |
| H | -3.82509200 | 5.07987300  | -0.27325700 |
| H | -2.68129600 | 6.00675300  | -1.24122500 |
| C | 0.38885500  | 3.99359400  | 2.55807300  |
| H | -0.34895200 | 4.39718300  | 3.25888400  |
| H | 0.83922000  | 3.10001500  | 3.00186900  |
| H | 1.18226000  | 4.74389800  | 2.45119800  |
| C | 1.02617700  | 0.50402600  | -5.36496300 |
| H | 0.06753400  | 0.60346600  | -5.89631400 |
| H | 1.78553200  | 0.29975800  | -6.12790300 |
| C | 1.32988100  | 1.81581600  | -4.64375900 |
| H | 2.33664100  | 1.77040600  | -4.20921200 |
| H | 1.31803500  | 2.65144300  | -5.35103000 |
| H | 1.38711800  | -3.99893500 | -4.13863800 |
| O | 0.60335400  | -3.75343700 | -1.60528400 |
| C | 0.35092300  | -5.06823000 | -2.07404600 |
| H | -0.28431700 | -5.04070400 | -2.96839600 |
| H | 1.28647200  | -5.58366400 | -2.32584200 |
| C | -0.36667400 | -5.82091800 | -0.97988300 |
| H | -0.43283800 | -6.88523600 | -1.25373900 |
| H | 0.19233200  | -5.74699000 | -0.03422300 |
| O | -1.65578400 | -5.26181400 | -0.83523100 |
| C | -2.37771700 | -5.81438000 | 0.24306500  |
| H | -1.85095900 | -5.66863800 | 1.19764300  |
| H | -3.33998200 | -5.29839200 | 0.28732200  |
| H | -2.55339500 | -6.89066100 | 0.09794100  |

-----

**TSB5f-1S**

| ----- |                         |           |           |
|-------|-------------------------|-----------|-----------|
|       | Coordinates (Angstroms) |           |           |
|       | X                       | Y         | Z         |
| ----- |                         |           |           |
| Ir    | -0.095253               | 0.257050  | -0.155095 |
| C     | -0.886756               | -0.208831 | -1.967721 |
| N     | 0.300116                | -1.779775 | -0.299963 |
| C     | -1.524105               | 0.634215  | -2.900082 |
| C     | -2.102850               | 0.111656  | -4.056594 |
| C     | -2.047859               | -1.258418 | -4.338199 |
| C     | -1.418742               | -2.129635 | -3.466773 |
| C     | -0.854002               | -1.580709 | -2.298217 |
| C     | -0.033637               | -3.892704 | -1.581516 |
| C     | -0.161938               | -2.415947 | -1.338541 |
| C     | 1.098635                | -2.421826 | 0.688716  |
| C     | 0.785833                | -2.267793 | 2.036009  |
| C     | 1.605110                | -2.808131 | 3.026541  |
| C     | 2.747261                | -3.512978 | 2.630707  |
| C     | 3.094017                | -3.661361 | 1.282693  |
| C     | 2.261470                | -3.098072 | 0.318948  |
| O     | 3.606262                | -4.023662 | 3.583465  |
| C     | 3.230370                | -5.304287 | 4.076233  |
| H     | -2.513249               | -1.633791 | -5.246426 |
| H     | 0.036002                | -4.432127 | -0.632055 |
| H     | -0.074941               | -1.671239 | 2.321891  |
| H     | 2.543321                | -3.151056 | -0.728381 |
| H     | 4.000056                | -5.600503 | 4.792448  |
| H     | 2.258599                | -5.269021 | 4.584215  |
| H     | 3.184193                | -6.044031 | 3.267083  |
| C     | 0.466383                | 2.385238  | -0.328632 |
| C     | -0.175591               | 2.181357  | 0.923620  |
| C     | 0.665105                | 1.334083  | 1.727054  |
| C     | 1.802448                | 0.992791  | 0.953563  |
| C     | 1.691254                | 1.629694  | -0.337369 |
| C     | 2.735493                | 1.727959  | -1.418119 |
| C     | 2.968262                | 0.171434  | 1.433614  |
| C     | 3.493775                | 0.447698  | -1.691585 |
| C     | 4.240303                | 0.977511  | 1.339078  |
| C     | 4.605867                | 1.825040  | 2.429070  |
| C     | 5.744139                | 2.587944  | 2.379039  |
| C     | 6.559233                | 2.570063  | 1.214898  |
| C     | 6.194934                | 1.759752  | 0.104935  |
| C     | 5.015116                | 0.950964  | 0.201984  |
| C     | 3.067931                | -0.399067 | -2.764123 |

|   |           |           |           |
|---|-----------|-----------|-----------|
| C | 3.738320  | -1.560392 | -3.059351 |
| C | 4.870783  | -1.945738 | -2.294106 |
| C | 5.300389  | -1.131666 | -1.212145 |
| C | 4.589954  | 0.084175  | -0.939736 |
| C | 5.592028  | -3.131760 | -2.595818 |
| C | 6.690104  | -3.495113 | -1.855472 |
| C | 7.105372  | -2.697920 | -0.765078 |
| C | 6.422060  | -1.549207 | -0.447743 |
| H | 0.114071  | 2.999097  | -1.145566 |
| H | -1.112741 | 2.618036  | 1.239682  |
| H | 0.477505  | 1.015165  | 2.742975  |
| H | 2.242071  | 2.068744  | -2.331105 |
| H | 3.448823  | 2.510387  | -1.130565 |
| H | 2.786974  | -0.139159 | 2.463824  |
| H | 3.067866  | -0.733967 | 0.834079  |
| H | 3.433389  | -2.195720 | -3.883816 |
| H | 5.261803  | -3.746345 | -3.430105 |
| H | 7.236636  | -4.401945 | -2.100157 |
| H | 7.965112  | -2.998684 | -0.172929 |
| H | 6.744649  | -0.949525 | 0.397627  |
| O | 3.740682  | 1.795243  | 3.475868  |
| C | 4.054869  | 2.559857  | 4.626654  |
| H | 4.083100  | 3.631828  | 4.397799  |
| H | 3.253147  | 2.364095  | 5.340614  |
| H | 5.012576  | 2.248682  | 5.060855  |
| O | 1.994917  | 0.055031  | -3.454030 |
| C | 1.571828  | -0.666569 | -4.596162 |
| H | 1.271652  | -1.687923 | -4.337730 |
| H | 0.709778  | -0.123849 | -4.985092 |
| H | 2.362397  | -0.695174 | -5.356308 |
| H | 0.906674  | -4.072935 | -2.120709 |
| H | 6.036724  | 3.226558  | 3.205851  |
| C | 7.732563  | 3.365504  | 1.131194  |
| C | 8.503414  | 3.365921  | -0.004858 |
| C | 7.005468  | 1.790626  | -1.060532 |
| C | 8.132942  | 2.573299  | -1.114890 |
| H | 9.399144  | 3.978985  | -0.055510 |
| H | 8.009244  | 3.980235  | 1.984604  |
| H | 8.741012  | 2.586519  | -2.015131 |
| H | 6.723832  | 1.189420  | -1.919891 |
| H | -1.649837 | -0.186280 | 0.244901  |
| C | -5.688386 | -1.802764 | -0.925085 |
| C | -6.936484 | -2.406303 | -0.825053 |
| C | -7.896419 | -1.805735 | -0.025753 |

|    |           |           |           |
|----|-----------|-----------|-----------|
| C  | -7.637896 | -0.617706 | 0.639196  |
| C  | -6.376797 | -0.047058 | 0.509305  |
| C  | -5.344611 | -0.620197 | -0.250113 |
| H  | -7.148868 | -3.323712 | -1.361519 |
| H  | -8.398881 | -0.137229 | 1.243121  |
| Cl | -6.133816 | 1.474643  | 1.325692  |
| Cl | -9.466020 | -2.551582 | 0.136087  |
| Cl | -4.537633 | -2.586061 | -1.980846 |
| C  | -3.952963 | -0.019351 | -0.327906 |
| H  | -3.994387 | 1.072008  | -0.402904 |
| H  | -3.450084 | -0.376181 | -1.227468 |
| N  | -3.125263 | 0.420449  | 1.882467  |
| C  | -3.104412 | -0.431935 | 0.867009  |
| C  | -2.899229 | -1.895183 | 1.125632  |
| H  | -3.864335 | -2.339006 | 1.400430  |
| H  | -2.538426 | -2.384228 | 0.219060  |
| H  | -2.194616 | -2.067479 | 1.936162  |
| O  | -2.274163 | 0.157733  | 2.927717  |
| C  | -2.928756 | 0.223257  | 4.236493  |
| C  | -4.031241 | -0.826267 | 4.311033  |
| H  | -4.510267 | -0.787228 | 5.294832  |
| H  | -4.803180 | -0.645803 | 3.555347  |
| H  | -3.622480 | -1.832073 | 4.167425  |
| C  | -1.784401 | -0.101599 | 5.185219  |
| H  | -0.986743 | 0.644552  | 5.103574  |
| H  | -2.149113 | -0.101443 | 6.217276  |
| H  | -1.370864 | -1.091874 | 4.967908  |
| C  | -3.461867 | 1.632201  | 4.470112  |
| H  | -3.812623 | 1.727258  | 5.503085  |
| H  | -2.674258 | 2.374031  | 4.300710  |
| H  | -4.304407 | 1.862069  | 3.810124  |
| H  | -3.230768 | 1.433965  | 1.696376  |
| S  | -3.331484 | 4.051630  | 0.348608  |
| C  | -4.581527 | 5.283301  | 0.664680  |
| H  | -4.309551 | 5.847595  | 1.560181  |
| H  | -4.635461 | 5.954420  | -0.196312 |
| H  | -5.545111 | 4.789739  | 0.810600  |
| O  | -3.778627 | 3.301303  | -0.845784 |
| O  | -3.295318 | 3.205208  | 1.579778  |
| O  | -2.066746 | 4.793020  | 0.148760  |
| C  | 4.357892  | -4.380166 | 0.899621  |
| H  | 5.229263  | -3.938739 | 1.394271  |
| H  | 4.321365  | -5.436208 | 1.193244  |
| H  | 4.516894  | -4.336301 | -0.181272 |

|   |           |           |           |
|---|-----------|-----------|-----------|
| C | 1.286323  | -2.589949 | 4.481750  |
| H | 0.546262  | -3.314053 | 4.844413  |
| H | 2.182088  | -2.690728 | 5.100500  |
| H | 0.872054  | -1.588604 | 4.636433  |
| C | -1.313037 | -3.612948 | -3.731637 |
| H | -0.423065 | -3.813044 | -4.347538 |
| H | -2.175991 | -3.952209 | -4.315722 |
| C | -1.197843 | -4.407509 | -2.431223 |
| H | -2.131314 | -4.326313 | -1.860380 |
| H | -1.042771 | -5.469584 | -2.646772 |
| H | -2.619692 | 0.763553  | -4.753552 |
| O | -1.572430 | 1.963597  | -2.597595 |
| C | -1.840431 | 2.884976  | -3.640364 |
| H | -1.292272 | 2.598596  | -4.547896 |
| H | -2.913428 | 2.915100  | -3.870673 |
| C | -1.387379 | 4.249885  | -3.184330 |
| H | -1.678451 | 4.992509  | -3.944208 |
| H | -1.873075 | 4.511753  | -2.236698 |
| O | 0.018394  | 4.226731  | -3.026739 |
| C | 0.516560  | 5.405263  | -2.431366 |
| H | 0.052369  | 5.583675  | -1.451374 |
| H | 1.593142  | 5.269308  | -2.298012 |
| H | 0.341029  | 6.283940  | -3.070500 |

# **TSB7-8uR**

| Coordinates (Angstroms) |           |           |           |
|-------------------------|-----------|-----------|-----------|
|                         | X         | Y         | Z         |
| Ir                      | -0.282589 | -0.799341 | 0.597198  |
| C                       | -1.104714 | -0.158068 | 2.320100  |
| N                       | -0.063615 | 1.278561  | 0.444694  |
| C                       | -1.734386 | -0.935118 | 3.306189  |
| C                       | -2.266513 | -0.346045 | 4.449311  |
| C                       | -2.241808 | 1.045320  | 4.609321  |
| C                       | -1.679751 | 1.861961  | 3.640686  |
| C                       | -1.105795 | 1.234751  | 2.517237  |
| C                       | -0.453990 | 3.495210  | 1.536858  |
| C                       | -0.502372 | 1.998241  | 1.438092  |
| C                       | 0.547451  | 1.821629  | -0.720866 |
| C                       | 0.143342  | 1.327983  | -1.960177 |
| C                       | 0.733617  | 1.763206  | -3.141689 |
| C                       | 1.756158  | 2.714156  | -3.051940 |

|   |           |           |           |
|---|-----------|-----------|-----------|
| C | 2.201118  | 3.206544  | -1.820893 |
| C | 1.592405  | 2.741696  | -0.654076 |
| O | 2.394721  | 3.148277  | -4.196029 |
| C | 1.710698  | 4.199182  | -4.870865 |
| H | -2.685381 | 1.484080  | 5.499800  |
| H | -0.438103 | 3.955649  | 0.545049  |
| H | -0.617810 | 0.556255  | -1.998086 |
| H | 1.959834  | 3.080687  | 0.309133  |
| H | 2.350645  | 4.508015  | -5.700504 |
| H | 0.745579  | 3.860028  | -5.267019 |
| H | 1.542378  | 5.053010  | -4.202959 |
| C | 0.672591  | -2.637377 | 1.319727  |
| C | -0.097661 | -2.950187 | 0.167542  |
| C | 0.530798  | -2.307468 | -0.968451 |
| C | 1.631795  | -1.565863 | -0.498154 |
| C | 1.728023  | -1.742969 | 0.939069  |
| C | 2.862297  | -1.354169 | 1.847399  |
| C | 2.593347  | -0.768966 | -1.337945 |
| C | 3.432619  | 0.029914  | 1.644996  |
| C | 3.991435  | -1.315338 | -1.171017 |
| C | 4.402398  | -2.407279 | -1.984005 |
| C | 5.641082  | -2.971023 | -1.853534 |
| C | 6.539948  | -2.492016 | -0.867255 |
| C | 6.141009  | -1.420344 | -0.018793 |
| C | 4.847104  | -0.830703 | -0.200480 |
| C | 2.999068  | 1.087270  | 2.504890  |
| C | 3.575964  | 2.330948  | 2.442450  |
| C | 4.587599  | 2.599585  | 1.482957  |
| C | 4.982463  | 1.584931  | 0.569952  |
| C | 4.398277  | 0.280808  | 0.694459  |
| C | 5.217763  | 3.870797  | 1.418431  |
| C | 6.188073  | 4.128227  | 0.481971  |
| C | 6.558011  | 3.130865  | -0.448323 |
| C | 5.964826  | 1.892541  | -0.408145 |
| H | 0.492733  | -2.995480 | 2.323919  |
| H | -0.938390 | -3.627362 | 0.143591  |
| H | 0.207650  | -2.364576 | -1.999173 |
| H | 2.517088  | -1.456064 | 2.878705  |
| H | 3.664653  | -2.090330 | 1.710173  |
| H | 2.278732  | -0.818169 | -2.382125 |
| H | 2.576362  | 0.280668  | -1.040502 |
| H | 3.283407  | 3.124134  | 3.121865  |
| H | 4.917999  | 4.638335  | 2.128005  |
| H | 6.666598  | 5.102898  | 0.446030  |

|   |           |           |           |
|---|-----------|-----------|-----------|
| H | 7.312757  | 3.346743  | -1.199126 |
| H | 6.253991  | 1.134237  | -1.128944 |
| O | 3.493794  | -2.914954 | -2.887261 |
| C | 3.708494  | -2.496076 | -4.231371 |
| H | 4.678484  | -2.846385 | -4.605248 |
| H | 2.907840  | -2.941013 | -4.826188 |
| H | 3.663047  | -1.402757 | -4.317622 |
| O | 2.023576  | 0.743677  | 3.381703  |
| C | 1.661047  | 1.680410  | 4.380704  |
| H | 1.249821  | 2.594937  | 3.939804  |
| H | 0.894454  | 1.191831  | 4.983179  |
| H | 2.522475  | 1.931433  | 5.011989  |
| H | 0.494759  | 3.767395  | 2.021469  |
| H | 5.927321  | -3.803556 | -2.490891 |
| C | 7.821813  | -3.079201 | -0.693037 |
| C | 8.670560  | -2.633244 | 0.287410  |
| C | 7.039558  | -0.992984 | 0.997671  |
| C | 8.270333  | -1.581944 | 1.145152  |
| H | 9.647852  | -3.090772 | 0.413767  |
| H | 8.115319  | -3.893745 | -1.350600 |
| H | 8.942758  | -1.241553 | 1.927678  |
| H | 6.744247  | -0.194286 | 1.670601  |
| C | 3.334409  | 4.193491  | -1.772830 |
| H | 4.238360  | 3.779225  | -2.231376 |
| H | 3.088030  | 5.111202  | -2.320012 |
| H | 3.568557  | 4.465542  | -0.740903 |
| C | 0.301954  | 1.194849  | -4.466552 |
| H | -0.488346 | 1.803215  | -4.923722 |
| H | 1.136577  | 1.156473  | -5.173127 |
| H | -0.095514 | 0.182096  | -4.341106 |
| C | -1.658273 | 3.366812  | 3.755630  |
| C | -1.617743 | 4.028695  | 2.378591  |
| H | -2.533401 | 3.711428  | 4.317579  |
| H | -0.774761 | 3.677988  | 4.332422  |
| H | -2.563749 | 3.841521  | 1.854732  |
| H | -1.513966 | 5.113488  | 2.483097  |
| H | -2.724799 | -0.955259 | 5.222394  |
| O | -1.826794 | -2.275005 | 3.040833  |
| C | -2.742349 | -3.077598 | 3.763638  |
| H | -3.681450 | -2.536210 | 3.935145  |
| H | -2.326145 | -3.363870 | 4.738506  |
| C | -2.983870 | -4.317987 | 2.925962  |
| H | -3.562175 | -5.047970 | 3.507392  |
| H | -2.025069 | -4.771709 | 2.658602  |

|    |           |           |           |
|----|-----------|-----------|-----------|
| O  | -3.647507 | -4.032694 | 1.702884  |
| C  | -5.055098 | -3.922218 | 1.826961  |
| H  | -5.450372 | -3.698064 | 0.833001  |
| H  | -5.488210 | -4.867880 | 2.178782  |
| H  | -5.347340 | -3.118185 | 2.513929  |
| H  | -1.899811 | -0.586204 | 0.052417  |
| C  | -6.058486 | 0.636683  | -1.403113 |
| C  | -7.079424 | 1.559181  | -1.216074 |
| C  | -6.733696 | 2.881538  | -0.980244 |
| C  | -5.407857 | 3.284746  | -0.946096 |
| C  | -4.420566 | 2.325881  | -1.141091 |
| C  | -4.696018 | 0.969056  | -1.361337 |
| H  | -8.117452 | 1.250071  | -1.255652 |
| H  | -5.143368 | 4.321673  | -0.774899 |
| Cl | -2.771591 | 2.895575  | -1.128675 |
| Cl | -7.992298 | 4.063184  | -0.731526 |
| Cl | -6.541467 | -1.015191 | -1.705424 |
| C  | -3.608993 | -0.064600 | -1.555695 |
| H  | -2.674171 | 0.431565  | -1.807481 |
| H  | -3.853609 | -0.703318 | -2.408290 |
| N  | -3.319861 | -2.284958 | -0.591420 |
| C  | -3.402835 | -0.976193 | -0.340899 |
| C  | -4.051051 | -0.627766 | 0.968970  |
| H  | -3.812977 | 0.400934  | 1.246026  |
| H  | -5.138318 | -0.720121 | 0.872995  |
| H  | -3.709786 | -1.301412 | 1.752827  |
| O  | -2.577030 | -2.620486 | -1.700167 |
| C  | -3.020313 | -3.831254 | -2.396527 |
| C  | -4.489608 | -3.715491 | -2.773849 |
| H  | -4.781637 | -4.586049 | -3.370247 |
| H  | -5.128001 | -3.686737 | -1.885515 |
| H  | -4.667662 | -2.815410 | -3.370183 |
| C  | -2.128061 | -3.823110 | -3.630902 |
| H  | -1.071005 | -3.884194 | -3.351065 |
| H  | -2.364369 | -4.685414 | -4.262077 |
| H  | -2.286857 | -2.910666 | -4.215517 |
| C  | -2.753506 | -5.061356 | -1.533604 |
| H  | -3.080731 | -5.957690 | -2.070978 |
| H  | -1.684618 | -5.168824 | -1.322463 |
| H  | -3.299801 | -5.028600 | -0.584810 |
| H  | -3.180796 | -2.912982 | 0.211611  |

-----

**TSB7f-1R**

| ----- |                         |           |           |
|-------|-------------------------|-----------|-----------|
|       | Coordinates (Angstroms) |           |           |
|       | X                       | Y         | Z         |
| ----- |                         |           |           |
| Ir    | -0.259968               | 0.518444  | -0.253210 |
| C     | -1.031005               | 0.281610  | -2.120282 |
| N     | 0.028379                | -1.526752 | -0.603821 |
| C     | -1.579945               | 1.252714  | -2.979315 |
| C     | -2.155008               | 0.890542  | -4.197157 |
| C     | -2.149489               | -0.437474 | -4.630875 |
| C     | -1.565174               | -1.425138 | -3.856636 |
| C     | -1.027477               | -1.041952 | -2.611453 |
| C     | -0.248221               | -3.433841 | -2.198444 |
| C     | -0.390804               | -2.010317 | -1.738777 |
| C     | 0.693405                | -2.310937 | 0.379719  |
| C     | 0.286107                | -2.198965 | 1.707713  |
| C     | 0.951192                | -2.877006 | 2.725136  |
| C     | 2.045139                | -3.677894 | 2.377346  |
| C     | 2.487685                | -3.790933 | 1.055482  |
| C     | 1.806793                | -3.087141 | 0.062044  |
| O     | 2.760580                | -4.325287 | 3.364179  |
| C     | 2.215549                | -5.582882 | 3.746760  |
| H     | -2.599791               | -0.687485 | -5.588415 |
| H     | -0.189343               | -4.118629 | -1.348029 |
| H     | -0.526431               | -1.525959 | 1.962393  |
| H     | 2.174903                | -3.116126 | -0.958700 |
| H     | 2.895092                | -6.002978 | 4.491827  |
| H     | 1.218271                | -5.470484 | 4.189754  |
| H     | 2.151167                | -6.264553 | 2.889460  |
| C     | 0.530317                | 2.568223  | -0.379643 |
| C     | -0.211596               | 2.437079  | 0.821594  |
| C     | 0.498488                | 1.513687  | 1.681021  |
| C     | 1.630803                | 1.046803  | 0.981210  |
| C     | 1.658227                | 1.678926  | -0.322294 |
| C     | 2.774905                | 1.682476  | -1.330210 |
| C     | 2.654974                | 0.081506  | 1.513378  |
| C     | 3.415468                | 0.339208  | -1.590058 |
| C     | 4.023363                | 0.717728  | 1.514835  |
| C     | 4.437736                | 1.470429  | 2.647933  |
| C     | 5.643567                | 2.113475  | 2.678931  |
| C     | 6.505801                | 2.062231  | 1.553827  |
| C     | 6.111000                | 1.321587  | 0.403746  |
| C     | 4.851936                | 0.638245  | 0.412860  |
| C     | 2.990822                | -0.423344 | -2.723971 |

|   |           |           |           |
|---|-----------|-----------|-----------|
| C | 3.586121  | -1.620480 | -3.035702 |
| C | 4.628279  | -2.132828 | -2.217563 |
| C | 5.037101  | -1.412945 | -1.062597 |
| C | 4.415764  | -0.150984 | -0.780493 |
| C | 5.280533  | -3.353339 | -2.537617 |
| C | 6.291677  | -3.839802 | -1.745896 |
| C | 6.680683  | -3.138781 | -0.582498 |
| C | 6.062108  | -1.959410 | -0.245988 |
| H | 0.289236  | 3.201618  | -1.220986 |
| H | -1.101330 | 2.999206  | 1.066293  |
| H | 0.218208  | 1.217482  | 2.681555  |
| H | 2.379664  | 2.090652  | -2.263398 |
| H | 3.542965  | 2.381908  | -0.976970 |
| H | 2.361230  | -0.221494 | 2.519304  |
| H | 2.676767  | -0.818812 | 0.897854  |
| H | 3.291323  | -2.186886 | -3.912620 |
| H | 4.969115  | -3.894073 | -3.428281 |
| H | 6.787788  | -4.770753 | -2.006213 |
| H | 7.467153  | -3.538630 | 0.051224  |
| H | 6.362457  | -1.433706 | 0.654949  |
| O | 3.577753  | 1.558365  | 3.723242  |
| C | 3.819080  | 0.573366  | 4.723826  |
| H | 4.802560  | 0.717817  | 5.188475  |
| H | 3.038444  | 0.693127  | 5.478405  |
| H | 3.766851  | -0.441021 | 4.307095  |
| O | 2.002418  | 0.149878  | -3.450953 |
| C | 1.615191  | -0.460605 | -4.667763 |
| H | 1.240434  | -1.477063 | -4.507315 |
| H | 0.812592  | 0.160390  | -5.067501 |
| H | 2.451230  | -0.484669 | -5.378064 |
| H | 0.713962  | -3.513851 | -2.725604 |
| H | 5.932584  | 2.677505  | 3.561768  |
| C | 7.753654  | 2.741081  | 1.549416  |
| C | 8.571696  | 2.697989  | 0.449367  |
| C | 6.976639  | 1.307862  | -0.724466 |
| C | 8.174540  | 1.977135  | -0.701182 |
| H | 9.523932  | 3.220836  | 0.455093  |
| H | 8.046859  | 3.299487  | 2.435097  |
| H | 8.822913  | 1.956674  | -1.572733 |
| H | 6.680549  | 0.764746  | -1.616603 |
| H | -1.853534 | 0.093292  | 0.229120  |
| C | -5.906660 | -1.595973 | 0.985110  |
| C | -6.952459 | -2.306703 | 0.410433  |
| C | -6.650483 | -3.459231 | -0.299607 |

|    |           |           |           |
|----|-----------|-----------|-----------|
| C  | -5.348827 | -3.926007 | -0.396915 |
| C  | -4.336094 | -3.180309 | 0.195154  |
| C  | -4.558769 | -1.964959 | 0.857716  |
| H  | -7.976494 | -1.970474 | 0.524482  |
| H  | -5.124072 | -4.852978 | -0.911445 |
| Cl | -2.732426 | -3.874469 | 0.150789  |
| Cl | -7.940575 | -4.360571 | -1.053395 |
| Cl | -6.344177 | -0.204099 | 1.948379  |
| C  | -3.429370 | -1.151392 | 1.441175  |
| H  | -2.500553 | -1.706387 | 1.341460  |
| H  | -3.591837 | -1.017171 | 2.514048  |
| N  | -3.164189 | 1.231365  | 1.727148  |
| C  | -3.253270 | 0.249502  | 0.829478  |
| C  | -3.948482 | 0.636152  | -0.452233 |
| H  | -3.818509 | -0.150501 | -1.198003 |
| H  | -5.018078 | 0.782544  | -0.274082 |
| H  | -3.535560 | 1.567578  | -0.844458 |
| O  | -2.372775 | 0.949705  | 2.817856  |
| C  | -2.665764 | 1.743680  | 4.011454  |
| C  | -4.163901 | 1.771041  | 4.282558  |
| H  | -4.347137 | 2.281336  | 5.233923  |
| H  | -4.702223 | 2.312981  | 3.498810  |
| H  | -4.566696 | 0.755687  | 4.356091  |
| C  | -1.915494 | 0.980223  | 5.096074  |
| H  | -0.848291 | 0.911073  | 4.857816  |
| H  | -2.015685 | 1.503418  | 6.052260  |
| H  | -2.319184 | -0.031275 | 5.212073  |
| C  | -2.096695 | 3.150223  | 3.839171  |
| H  | -2.259878 | 3.722361  | 4.758975  |
| H  | -1.019264 | 3.114772  | 3.647851  |
| H  | -2.584689 | 3.688787  | 3.020762  |
| H  | -3.177399 | 2.215592  | 1.420727  |
| S  | -3.518432 | 4.819281  | 0.092850  |
| C  | -4.447970 | 6.279773  | 0.522519  |
| H  | -4.240003 | 6.540153  | 1.563139  |
| H  | -4.142432 | 7.097803  | -0.134651 |
| H  | -5.513331 | 6.075504  | 0.392579  |
| O  | -3.862865 | 4.499142  | -1.309079 |
| O  | -3.989424 | 3.767708  | 1.042177  |
| O  | -2.091944 | 5.162159  | 0.298659  |
| C  | 3.691100  | -4.630991 | 0.727926  |
| H  | 4.559347  | -4.332745 | 1.324774  |
| H  | 3.503755  | -5.691022 | 0.938283  |
| H  | 3.950015  | -4.538642 | -0.329964 |

|   |           |           |           |
|---|-----------|-----------|-----------|
| C | 0.527978  | -2.707841 | 4.159546  |
| H | -0.163529 | -3.500005 | 4.471933  |
| H | 1.388739  | -2.738427 | 4.834859  |
| H | 0.014015  | -1.750860 | 4.296469  |
| C | -1.459536 | -2.853525 | -4.330606 |
| H | -0.560332 | -2.958845 | -4.956121 |
| H | -2.313466 | -3.100241 | -4.971666 |
| C | -1.371388 | -3.828980 | -3.161342 |
| H | -2.328405 | -3.843075 | -2.628031 |
| H | -1.188710 | -4.845147 | -3.526031 |
| H | -2.623685 | 1.641651  | -4.825073 |
| O | -1.552583 | 2.553094  | -2.560763 |
| C | -1.637165 | 3.577356  | -3.542405 |
| H | -1.119521 | 3.266889  | -4.458612 |
| H | -2.685033 | 3.794508  | -3.782426 |
| C | -0.974811 | 4.815214  | -2.989352 |
| H | -1.181431 | 5.663761  | -3.660256 |
| H | -1.382208 | 5.047197  | -1.998461 |
| O | 0.419393  | 4.579343  | -2.905373 |
| C | 1.093884  | 5.594689  | -2.194306 |
| H | 0.680090  | 5.717767  | -1.182652 |
| H | 2.143340  | 5.297136  | -2.119652 |
| H | 1.030530  | 6.560233  | -2.718251 |

# TSB7f-1S

|    | Coordinates (Angstroms) |           |           |
|----|-------------------------|-----------|-----------|
|    | X                       | Y         | Z         |
| Ir | 0.150988                | -0.671086 | -0.125618 |
| C  | 0.867235                | -0.747749 | -2.030875 |
| N  | 0.079587                | 1.333650  | -0.712149 |
| C  | 1.198694                | -1.859475 | -2.830681 |
| C  | 1.798201                | -1.698858 | -4.078128 |
| C  | 2.058306                | -0.427643 | -4.598817 |
| C  | 1.689552                | 0.702735  | -3.891421 |
| C  | 1.083941                | 0.512401  | -2.633176 |
| C  | 0.742205                | 3.033220  | -2.412170 |
| C  | 0.601852                | 1.642859  | -1.864123 |
| C  | -0.530224               | 2.299199  | 0.136881  |
| C  | -0.163977               | 2.343854  | 1.478267  |
| C  | -0.787191               | 3.215529  | 2.366875  |
| C  | -1.800680               | 4.043980  | 1.872856  |

|   |           |           |           |
|---|-----------|-----------|-----------|
| C | -2.205681 | 4.000397  | 0.534044  |
| C | -1.563075 | 3.112383  | -0.327778 |
| O | -2.472726 | 4.893344  | 2.728889  |
| C | -1.809821 | 6.135397  | 2.939750  |
| H | 2.542789  | -0.334613 | -5.567660 |
| H | 0.775090  | 3.766836  | -1.602166 |
| H | 0.587305  | 1.654495  | 1.845168  |
| H | -1.894542 | 3.029728  | -1.358634 |
| H | -2.460283 | 6.734981  | 3.580643  |
| H | -0.842452 | 5.995418  | 3.437471  |
| H | -1.649848 | 6.662455  | 1.990696  |
| C | -0.799785 | -2.645029 | 0.106909  |
| C | -0.042389 | -2.361643 | 1.273646  |
| C | -0.667509 | -1.250375 | 1.949968  |
| C | -1.771260 | -0.832483 | 1.173336  |
| C | -1.860650 | -1.680423 | 0.002652  |
| C | -2.973850 | -1.755008 | -1.008019 |
| C | -2.726749 | 0.271217  | 1.538091  |
| C | -3.494511 | -0.419343 | -1.488676 |
| C | -4.134580 | -0.268313 | 1.615119  |
| C | -4.592415 | -0.839356 | 2.834017  |
| C | -5.842649 | -1.382039 | 2.945609  |
| C | -6.708108 | -1.410549 | 1.822520  |
| C | -6.264565 | -0.865273 | 0.584489  |
| C | -4.958191 | -0.283986 | 0.506824  |
| C | -2.994788 | 0.121708  | -2.715604 |
| C | -3.468599 | 1.312258  | -3.208692 |
| C | -4.465719 | 2.032864  | -2.499753 |
| C | -4.958725 | 1.528259  | -1.266594 |
| C | -4.454157 | 0.274960  | -0.785038 |
| C | -4.992886 | 3.249651  | -3.008457 |
| C | -5.967763 | 3.934377  | -2.325685 |
| C | -6.446051 | 3.443270  | -1.090016 |
| C | -5.946282 | 2.273994  | -0.569979 |
| H | -0.626431 | -3.436332 | -0.605979 |
| H | 0.799791  | -2.933600 | 1.638499  |
| H | -0.355435 | -0.813399 | 2.888576  |
| H | -2.617546 | -2.341126 | -1.857767 |
| H | -3.800875 | -2.317754 | -0.557331 |
| H | -2.421666 | 0.698444  | 2.494728  |
| H | -2.682489 | 1.069174  | 0.795342  |
| H | -3.109467 | 1.718485  | -4.148111 |
| H | -4.615149 | 3.627939  | -3.955543 |
| H | -6.369430 | 4.859207  | -2.730770 |

|    |           |           |           |
|----|-----------|-----------|-----------|
| H  | -7.207789 | 3.996166  | -0.547479 |
| H  | -6.315347 | 1.909447  | 0.383680  |
| O  | -3.721480 | -0.866175 | 3.901522  |
| C  | -3.936998 | 0.174990  | 4.848287  |
| H  | -4.919086 | 0.075410  | 5.327226  |
| H  | -3.153559 | 0.079738  | 5.603204  |
| H  | -3.865085 | 1.162316  | 4.373971  |
| O  | -2.067393 | -0.642848 | -3.339021 |
| C  | -1.623044 | -0.247842 | -4.623685 |
| H  | -1.123919 | 0.726650  | -4.592816 |
| H  | -0.909298 | -1.009671 | -4.937793 |
| H  | -2.457647 | -0.212695 | -5.335160 |
| H  | -0.151575 | 3.261930  | -3.009956 |
| H  | -6.164541 | -1.811611 | 3.890466  |
| C  | -8.001749 | -1.992166 | 1.902984  |
| C  | -8.819848 | -2.037298 | 0.803101  |
| C  | -7.133585 | -0.937394 | -0.538886 |
| C  | -8.377812 | -1.506252 | -0.431430 |
| H  | -9.806460 | -2.486394 | 0.875019  |
| H  | -8.330625 | -2.405797 | 2.853177  |
| H  | -9.028390 | -1.553095 | -1.300315 |
| H  | -6.802260 | -0.540470 | -1.493460 |
| H  | 1.768517  | -0.334609 | 0.295599  |
| C  | 4.574072  | 2.969419  | 0.329809  |
| C  | 5.625470  | 3.823621  | 0.640989  |
| C  | 6.921451  | 3.366640  | 0.457851  |
| C  | 7.174530  | 2.099045  | -0.042397 |
| C  | 6.092748  | 1.279247  | -0.340861 |
| C  | 4.757074  | 1.663295  | -0.153340 |
| H  | 5.432485  | 4.822502  | 1.014446  |
| H  | 8.189058  | 1.753233  | -0.202604 |
| Cl | 6.465444  | -0.284593 | -1.018339 |
| Cl | 8.260699  | 4.415547  | 0.846304  |
| Cl | 2.965989  | 3.627328  | 0.550389  |
| C  | 3.593634  | 0.750729  | -0.480493 |
| H  | 3.794589  | 0.172453  | -1.382805 |
| H  | 2.723104  | 1.369373  | -0.684832 |
| N  | 3.706976  | -1.434625 | 0.653113  |
| C  | 3.228419  | -0.191312 | 0.663914  |
| C  | 3.112108  | 0.387011  | 2.053184  |
| H  | 4.113997  | 0.538277  | 2.470183  |
| H  | 2.608342  | 1.351533  | 2.013225  |
| H  | 2.555220  | -0.281408 | 2.712573  |
| O  | 3.753301  | -2.072161 | -0.564469 |

|   |           |           |           |
|---|-----------|-----------|-----------|
| C | 4.161619  | -3.473358 | -0.497754 |
| C | 3.010540  | -4.298748 | 0.072663  |
| H | 3.222508  | -5.366469 | -0.051669 |
| H | 2.864649  | -4.116449 | 1.142016  |
| H | 2.087379  | -4.056642 | -0.460875 |
| C | 4.397104  | -3.794082 | -1.968169 |
| H | 5.241800  | -3.220168 | -2.363493 |
| H | 4.613123  | -4.860150 | -2.087998 |
| H | 3.508549  | -3.550629 | -2.556546 |
| C | 5.441732  | -3.646164 | 0.314380  |
| H | 5.785395  | -4.681454 | 0.215907  |
| H | 6.233075  | -2.985895 | -0.052540 |
| H | 5.282567  | -3.452113 | 1.379423  |
| H | 3.528210  | -2.030642 | 1.476802  |
| S | 2.539569  | -3.028941 | 4.030791  |
| C | 3.254239  | -3.500056 | 5.592765  |
| H | 3.811920  | -2.653011 | 5.999003  |
| H | 2.452338  | -3.782473 | 6.279112  |
| H | 3.924711  | -4.347857 | 5.432834  |
| O | 1.810714  | -4.213819 | 3.525765  |
| O | 3.701438  | -2.665228 | 3.166535  |
| O | 1.657454  | -1.869844 | 4.301833  |
| C | -3.337206 | 4.870049  | 0.060059  |
| H | -4.256044 | 4.662490  | 0.618717  |
| H | -3.111146 | 5.933918  | 0.198484  |
| H | -3.537572 | 4.700279  | -1.001128 |
| C | -0.400980 | 3.227209  | 3.821494  |
| H | 0.402360  | 3.948521  | 4.016583  |
| H | -1.250819 | 3.498863  | 4.455134  |
| H | -0.037594 | 2.241548  | 4.130506  |
| C | 1.907095  | 2.096735  | -4.430828 |
| H | 1.080417  | 2.364369  | -5.105782 |
| H | 2.821019  | 2.120930  | -5.035057 |
| C | 1.981331  | 3.126760  | -3.305580 |
| H | 2.883277  | 2.952960  | -2.704041 |
| H | 2.056670  | 4.137734  | -3.718581 |
| H | 2.083100  | -2.569795 | -4.660266 |
| O | 0.932990  | -3.101713 | -2.326617 |
| C | 0.776431  | -4.184375 | -3.227975 |
| H | 0.205611  | -3.864755 | -4.109391 |
| H | 1.749347  | -4.570173 | -3.560042 |
| C | 0.029324  | -5.279913 | -2.506801 |
| H | 0.010247  | -6.181051 | -3.139152 |
| H | 0.544898  | -5.535202 | -1.568595 |

|   |           |           |           |
|---|-----------|-----------|-----------|
| O | -1.282144 | -4.828083 | -2.244740 |
| C | -2.016114 | -5.712514 | -1.426612 |
| H | -1.530862 | -5.853104 | -0.449342 |
| H | -3.002597 | -5.267670 | -1.273462 |
| H | -2.136635 | -6.696023 | -1.904686 |

**E-2a-H<sup>+</sup>**

|    | Coordinates (Angstroms) |           |           |
|----|-------------------------|-----------|-----------|
|    | X                       | Y         | Z         |
| C  | -1.460601               | -0.983032 | -0.407979 |
| C  | -2.690551               | -1.521105 | -0.057387 |
| C  | -3.734715               | -0.645472 | 0.202672  |
| C  | -3.570159               | 0.727979  | 0.112226  |
| C  | -2.321255               | 1.224443  | -0.240850 |
| C  | -1.224295               | 0.394792  | -0.508576 |
| H  | -2.828974               | -2.593864 | 0.010181  |
| H  | -4.394027               | 1.402618  | 0.312657  |
| Cl | -2.177847               | 2.965199  | -0.351465 |
| Cl | -5.292367               | -1.286821 | 0.650711  |
| Cl | -0.164010               | -2.110009 | -0.741899 |
| C  | 0.136115                | 0.930448  | -0.893441 |
| H  | 0.082311                | 2.013927  | -1.042418 |
| H  | 0.459655                | 0.496740  | -1.845748 |
| N  | 2.330658                | 0.297158  | -0.206263 |
| C  | 1.172934                | 0.709038  | 0.170757  |
| C  | 0.921378                | 0.955196  | 1.610953  |
| H  | 0.003127                | 1.524578  | 1.755668  |
| H  | 0.820825                | -0.009677 | 2.124476  |
| H  | 1.767111                | 1.482061  | 2.062082  |
| O  | 3.304904                | 0.081295  | 0.704364  |
| C  | 4.641060                | -0.236335 | 0.138738  |
| C  | 4.580774                | -1.593252 | -0.550414 |
| H  | 4.169148                | -2.348179 | 0.126582  |
| H  | 3.985006                | -1.577669 | -1.469948 |
| H  | 5.595494                | -1.893314 | -0.830189 |
| C  | 5.477792                | -0.286016 | 1.407444  |
| H  | 6.511639                | -0.533222 | 1.150134  |
| H  | 5.468204                | 0.683648  | 1.914652  |
| H  | 5.098978                | -1.049114 | 2.094630  |
| C  | 5.086860                | 0.889903  | -0.783344 |
| H  | 4.516072                | 0.922456  | -1.718504 |

|   |          |          |           |
|---|----------|----------|-----------|
| H | 5.000294 | 1.857303 | -0.278991 |
| H | 6.135572 | 0.730934 | -1.051836 |
| H | 2.545504 | 0.098517 | -1.184210 |

### tAmylOH

| Coordinates (Angstroms) |           |           |           |
|-------------------------|-----------|-----------|-----------|
|                         | X         | Y         | Z         |
| C                       | -2.151886 | -0.002825 | 0.089531  |
| H                       | -2.216302 | 0.924060  | 0.670456  |
| H                       | -3.052760 | -0.061054 | -0.531709 |
| H                       | -2.182862 | -0.844304 | 0.790579  |
| C                       | -0.904407 | -0.035706 | -0.788412 |
| H                       | -0.922226 | 0.817181  | -1.479531 |
| H                       | -0.915959 | -0.941339 | -1.408965 |
| C                       | 0.436590  | -0.000245 | -0.041963 |
| C                       | 0.595300  | 1.276933  | 0.783809  |
| H                       | -0.120458 | 1.314854  | 1.611671  |
| H                       | 1.602596  | 1.328517  | 1.215712  |
| H                       | 0.446698  | 2.162864  | 0.155832  |
| C                       | 0.636226  | -1.239363 | 0.832286  |
| H                       | -0.085781 | -1.275983 | 1.654646  |
| H                       | 0.529211  | -2.153000 | 0.236253  |
| H                       | 1.640261  | -1.235104 | 1.274579  |
| O                       | 1.414537  | -0.005282 | -1.094712 |
| H                       | 2.290353  | 0.012801  | -0.683332 |

### E-2a-H<sup>+</sup>-tAmylOH

| Coordinates (Angstroms) |          |           |           |
|-------------------------|----------|-----------|-----------|
|                         | X        | Y         | Z         |
| C                       | 2.219636 | 0.319289  | -0.988001 |
| C                       | 3.538725 | 0.567459  | -1.341112 |
| C                       | 4.539136 | 0.086046  | -0.509005 |
| C                       | 4.245663 | -0.626301 | 0.644034  |
| C                       | 2.911285 | -0.851370 | 0.958808  |
| C                       | 1.854824 | -0.391810 | 0.162303  |
| H                       | 3.777658 | 1.121272  | -2.241652 |
| H                       | 5.034148 | -0.997479 | 1.288365  |
| Cl                      | 2.587893 | -1.748330 | 2.426302  |

|    |           |           |           |
|----|-----------|-----------|-----------|
| Cl | 6.206210  | 0.388695  | -0.921458 |
| Cl | 0.975849  | 0.940798  | -2.049943 |
| C  | 0.405027  | -0.635943 | 0.502609  |
| H  | 0.324078  | -1.420286 | 1.262657  |
| H  | -0.144466 | -0.990690 | -0.372759 |
| N  | -1.440160 | 0.864604  | 0.628604  |
| C  | -0.273926 | 0.573561  | 1.084365  |
| C  | 0.306755  | 1.357226  | 2.201423  |
| H  | 1.379598  | 1.184695  | 2.289099  |
| H  | 0.110510  | 2.424172  | 2.067376  |
| H  | -0.177527 | 1.047070  | 3.136064  |
| O  | -2.166322 | 1.832077  | 1.239593  |
| C  | -2.974547 | 2.672299  | 0.322767  |
| C  | -2.103284 | 3.162449  | -0.823804 |
| H  | -1.182775 | 3.620911  | -0.448149 |
| H  | -1.843668 | 2.352102  | -1.512696 |
| H  | -2.654325 | 3.915776  | -1.395184 |
| C  | -3.389618 | 3.806304  | 1.247367  |
| H  | -4.057626 | 4.485782  | 0.710087  |
| H  | -3.921638 | 3.417410  | 2.121549  |
| H  | -2.516735 | 4.372338  | 1.587650  |
| C  | -4.176150 | 1.867097  | -0.154027 |
| H  | -3.878085 | 1.028224  | -0.790577 |
| H  | -4.744833 | 1.484815  | 0.699571  |
| H  | -4.831941 | 2.512955  | -0.746636 |
| H  | -1.898566 | 0.304886  | -0.127425 |
| C  | -3.966993 | -3.255586 | 1.125472  |
| H  | -3.432479 | -4.195368 | 0.949538  |
| H  | -4.064653 | -3.131197 | 2.209194  |
| H  | -4.977417 | -3.356377 | 0.714746  |
| C  | -3.228865 | -2.059867 | 0.530392  |
| H  | -2.235392 | -1.983030 | 0.992342  |
| H  | -3.769088 | -1.137777 | 0.781987  |
| C  | -3.041968 | -2.094884 | -0.991308 |
| C  | -2.171981 | -3.266066 | -1.440595 |
| H  | -2.682181 | -4.221967 | -1.286038 |
| H  | -1.943233 | -3.182029 | -2.509619 |
| H  | -1.227661 | -3.285459 | -0.884728 |
| C  | -4.372479 | -2.075354 | -1.738167 |
| H  | -4.918842 | -3.012820 | -1.596286 |
| H  | -5.004009 | -1.250331 | -1.389873 |
| H  | -4.202878 | -1.951703 | -2.814559 |
| O  | -2.333759 | -0.865142 | -1.283069 |
| H  | -2.250821 | -0.750660 | -2.240907 |

---

**MsO<sup>-</sup>-tAmylOH**

---

|   | Coordinates (Angstroms) |           |           |
|---|-------------------------|-----------|-----------|
|   | X                       | Y         | Z         |
| S | 2.404436                | 0.131420  | 0.054846  |
| C | 3.491106                | -1.279406 | -0.052200 |
| H | 4.189792                | -1.258716 | 0.787704  |
| H | 2.894551                | -2.194362 | -0.015522 |
| H | 4.043476                | -1.235308 | -0.993870 |
| O | 1.519324                | 0.037092  | -1.139410 |
| O | 3.273880                | 1.328248  | 0.025293  |
| O | 1.663959                | -0.025858 | 1.329493  |
| C | -4.536713               | -0.115033 | 0.472841  |
| H | -4.454881               | 0.676154  | 1.226981  |
| H | -5.544195               | -0.054304 | 0.045589  |
| H | -4.456465               | -1.079639 | 0.986058  |
| C | -3.489914               | 0.031920  | -0.627664 |
| H | -3.657712               | 0.972355  | -1.169598 |
| H | -3.615973               | -0.776357 | -1.360375 |
| C | -2.022533               | 0.014375  | -0.172999 |
| C | -1.685766               | 1.224920  | 0.702333  |
| H | -2.246143               | 1.218584  | 1.643921  |
| H | -0.618747               | 1.222794  | 0.952474  |
| H | -1.913402               | 2.155806  | 0.169715  |
| C | -1.668246               | -1.287243 | 0.551518  |
| H | -2.201697               | -1.381245 | 1.503896  |
| H | -1.917450               | -2.154327 | -0.072210 |
| H | -0.594392               | -1.316028 | 0.770031  |
| O | -1.279672               | 0.094935  | -1.392818 |
| H | -0.325275               | 0.089329  | -1.175770 |

---

## References

1. Frisch, M. J.; Trucks, G. W.; Schlegel, H. B.; Scuseria, G. E.; Robb, M. A.; Cheeseman, J. R.; Scalmani, G.; Barone, V.; Mennucci, B.; Petersson, G. A.; Nakatsuji, H.; Caricato, M.; Li, X.; Hratchian, H. P.; Izmaylov, A. F.; Bloino, J.; Zheng, G.; Sonnenberg, J. L.; Hada, M.; Ehara, M.; Toyota, K.; Fukuda, R.; Hasegawa, J.; Ishida, M.; Nakajima, T.; Honda, Y.; Kitao, O.; Nakai, H.; Vreven, T.; Montgomery Jr., J. A.; Peralta, J. E.; Ogliaro, F.; Bearpark, M.; Heyd, J. J.; Brothers, E.; Kudin, K. N.; Staroverov, V. N.; Keith, T.; Kobayashi, R.; Normand, J.; Raghavachari, K.; Rendell, A.; Burant, J. C.; Iyengar, S. S.; Tomasi, J.; Cossi, M.; Rega, N.; Millam, J. M.; Klene, M.; Knox, J. E.; Cross, J. B.; Bakken, V.; Adamo, C.; Jaramillo, J.; Gomperts, R.; Stratmann, R. E.; Yazyev, O.; Austin, A. J.; Cammi, R.; Pomelli, C.; Ochterski, J. W.; Martin, R. L.; Morokuma, K.; Zakrzewski, V. G.; Voth, G. A.; Salvador, P.; Dannenberg, J. J.; Dapprich, S.; Daniels, A. D.; Farkas, O.; Foresman, J. B.; Ortiz, J. V.; Cioslowski, J.; Fox, D. J. *Gaussian 09; Gaussian Inc.: Pittsburgh, PA, USA, 2010*.
2. Chai, J.-D.; Head-Gordon, M., Long-range corrected hybrid density functionals with damped atom-atom dispersion corrections. *Phys. Chem. Chem. Phys.* **2008**, *10*, 6615-6620.
3. Hay, P. J.; Wadt, W. R., Ab initio effective core potentials for molecular calculations. Potentials for k to au including the outermost core orbitals. *J. Chem. Phys.* **1985**, *82*, 299-310.
4. Ditchfield, R.; Hehre, W. J.; Pople, J. A., Self - consistent molecular - orbital methods. Ix. An extended gaussian - type basis for molecular - orbital studies of organic molecules. *J. Chem. Phys.* **1971**, *54*, 724-728.
5. Hehre, W. J.; Ditchfield, R.; Pople, J. A., Self—consistent molecular orbital methods. Xii. Further extensions of gaussian—type basis sets for use in molecular orbital studies of organic molecules. *J. Chem. Phys.* **1972**, *56*, 2257-2261.
6. Weigend, F.; Ahlrichs, R., Balanced basis sets of split valence, triple zeta valence and quadruple zeta valence quality for h to rn: Design and assessment of accuracy. *Phys. Chem. Chem. Phys.* **2005**, *7*, 3297-3305.
7. Neese, F., Software update: The orca program system, version 4.0. *WIREs Comput. Mol. Sci.* **2018**, *8*, e1327.
8. Neese, F.; Wennmo, F.; Becker, U.; Riplinger, C., The orca quantum chemistry program package. *J. Chem. Phys.* **2020**, *152*, 224108.
9. Mardirossian, N.; Head-Gordon, M.,  $\omega$ B97M-V: A combinatorially optimized, range-separated hybrid, meta-gga density functional with vv10 nonlocal correlation. *J. Chem. Phys.* **2016**, *144*, 214110.
10. Marenich, A. V.; Cramer, C. J.; Truhlar, D. G., Universal solvation model based on solute electron density and on a continuum model of the solvent defined by the bulk dielectric constant and atomic surface tensions. *J. Phys. Chem. B* **2009**, *113*, 6378-6396.
11. Hratchian, H. P.; Schlegel, H. B., Accurate reaction paths using a hessian based predictor-corrector integrator. *J. Chem. Phys.* **2004**, *120*, 9918-9924.
12. Grimme, S., Supramolecular binding thermodynamics by dispersion-corrected density functional theory. *Chem. Eur. J.* **2012**, *18*, 9955-9964.
13. Lu, T.; Chen, Q., Shermo: A general code for calculating molecular thermochemistry properties. *Comput. Theor. Chem.* **2021**, *1200*, 113249.
14. Bryantsev, V. S.; Diallo, M. S.; Goddard, W. A., Calculation of solvation free energies of charged solutes using mixed cluster/continuum models. *J. Phys. Chem. B* **2008**, *112*, 9709-9719.
15. Lu, T.; Chen, F., Multiwfn: A multifunctional wavefunction analyzer. *J. Comput. Chem.* **2012**, *33*, 580-592.

16. Lu, T.; Chen, Q., Independent gradient model based on hirshfeld partition: A new method for visual study of interactions in chemical systems. *J. Comput. Chem.* **2022**, *43*, 539-555.
17. Stephens, P. J.; Devlin, F. J.; Chabalowski, C. F.; Frisch, M. J., Ab initio calculation of vibrational absorption and circular dichroism spectra using density functional force fields. *J. Phys. Chem.* **1994**, *98*, 11623-11627.
18. Grimme, S.; Antony, J.; Ehrlich, S.; Krieg, H., A consistent and accurate ab initio parametrization of density functional dispersion correction (DFT-D) for the 94 elements H-Pu. *J. Chem. Phys.* **2010**, *132*, 154104.
19. Adamo, C.; Barone, V., Toward reliable density functional methods without adjustable parameters: The pbe0 model. *J. Chem. Phys.* **1999**, *110*, 6158-6170.
